# Supplementary material for: Acid-Induced Rearrangement of Epoxygermacranolides: Synthesis of Furanoheliangolides and Cadinanes from Nobilin
Source: MDPI journal article supplement (doi:10.3390/molecules22122252), 2017-12-18
Supplement: s1 [file s1]

# **Acid-Induced Rearrangement of Epoxygermacranolides: Synthesis of Furanoheliangolides and Cadinanes from Nobilin**

Maria De Mieri <sup>1, \*</sup>, Martin Smieško <sup>2</sup>, Isidor Ismajili <sup>1</sup>, Marcel Kaiser <sup>3, 4</sup>, and Matthias Hamburger

<sup>1, \*</sup>

<sup>1</sup> Pharmaceutical Biology, Pharmazentrum, University of Basel, Klingelbergstrasse 50, 4056 Basel, Switzerland; [mariademieri@gmail.com](mailto:mariademieri@gmail.com), [isidor.ismajili@gmail.com](mailto:isidor.ismajili@gmail.com), [Matthias.Hamburger@unibas.ch](mailto:Matthias.Hamburger@unibas.ch)

<sup>2</sup> Department of Molecular Modeling, Pharmazentrum, University of Basel, Klingelbergstrasse 50, 4056 Basel, Switzerland; [martin.smiesko@unibas.ch](mailto:martin.smiesko@unibas.ch)

<sup>3</sup> Department of Medical Parasitology & Infection Biology, Swiss Tropical and Public Health Institute, Socinstrasse 57, 4000 Basel, Switzerland; and University of Basel, Petersplatz 1, 4001 Basel, Switzerland; [marcel.kaiser@swisstph.ch](mailto:marcel.kaiser@swisstph.ch)

<sup>4</sup> University of Basel, Petersplatz 1, 4001 Basel, Switzerland.

\* Correspondence: [Matthias.Hamburger@unibas.ch](mailto:Matthias.Hamburger@unibas.ch); [mariademieri@gmail.com](mailto:mariademieri@gmail.com)

## Content

**Figure S1:**  $^1\text{H}$ -NMR spectrum of nobilin **1** in  $\text{CD}_3\text{OD}$ .

**Figure S2:**  $^{13}\text{C}$  spectrum of nobilin **1** in  $\text{CD}_3\text{OD}$ .

**Figure S3:**  $^1\text{H}$  NMR spectrum of compound **2** in  $\text{CD}_3\text{OD}$ .

**Figure S4:**  $^1\text{H}$ - $^1\text{H}$ -COSY spectrum of compound **2** in  $\text{CD}_3\text{OD}$ .

**Figure S5:** HSQC (green) and HMBC (red) overlaid spectra of compound **2** in  $\text{CD}_3\text{OD}$ .

**Figure S6:** 2D  $^1\text{H}$ - $^1\text{H}$  NOESY spectrum of compound **2** in  $\text{CD}_3\text{OD}$ .

**Figure S7:**  $^1\text{H}$  NMR spectrum of compound **3** in  $\text{CDCl}_3$ .

**Figure S8:**  $^{13}\text{C}$  spectrum of compound **3** in  $\text{CDCl}_3$ .

**Figure S9:**  $^1\text{H}$ - $^1\text{H}$ -COSY spectrum of compound **3** in  $\text{CDCl}_3$ .

**Figure S10:** HSQC (green) and HMBC (red) overlaid spectra of compound **3** in  $\text{CDCl}_3$ .

**Figure S11:** 2D  $^1\text{H}$ - $^1\text{H}$  NOESY spectrum of compound **3** in  $\text{CDCl}_3$ .

**Figure S12:**  $^1\text{H}$  NMR spectrum of compound **4** in  $\text{CDCl}_3$ .

**Figure S13:**  $^{13}\text{C}$  spectrum of compound **4** in  $\text{CDCl}_3$ .

**Figure S14:**  $^1\text{H}$ - $^1\text{H}$ -COSY spectrum of compound **4** in  $\text{CDCl}_3$ .

**Figure S15:** HSQC (green) and HMBC (red) overlaid spectra of compound **4** in  $\text{CDCl}_3$ .

**Figure S16:** 2D  $^1\text{H}$ - $^1\text{H}$  NOESY spectrum of compound **4** in  $\text{CDCl}_3$ .

**Figure S17:**  $^1\text{H}$ -NMR spectrum of compound **5** in  $\text{CD}_3\text{OD}$ .

**Figure S18:**  $^{13}\text{C}$  spectrum of compound **5** in  $\text{CD}_3\text{OD}$ .

**Figure S19:**  $^1\text{H}$ - $^1\text{H}$  COSY spectrum of compound **5** in  $\text{CD}_3\text{OD}$ .

**Figure S20:** Overlay of HSQC and HMBC spectra of compound **5** in  $\text{CD}_3\text{OD}$ .

**Figure S21:** 2D  $^1\text{H}$ - $^1\text{H}$  NOESY spectrum of compound **5** in  $\text{CD}_3\text{OD}$ .

**Figure S22:** 1D Selective NOESY spectrum of compound **5** in  $\text{CD}_3\text{OD}$  ( $D_8 = 0.3$  sec).

**Figure S23:** DFT 6-31+G(d,p) optimized structure of **5**

**Figure S24:**  $^1\text{H}$ -NMR spectrum of compounds **6-7** in  $\text{CD}_3\text{OD}$ .

**Figure S25:**  $^{13}\text{C}$  spectrum of compounds **6-7** in  $\text{CD}_3\text{OD}$ .

**Figure S26:**  $^1\text{H}$ - $^1\text{H}$  COSY spectrum of compounds **6-7** in  $\text{CD}_3\text{OD}$ .

**Figure S27:** Overlay of HSQC and HMBC spectra of compounds **6-7** in  $\text{CD}_3\text{OD}$ .

**Figure S28:** 2D  $^1\text{H}$ - $^1\text{H}$  NOESY spectrum of compounds **6-7** in  $\text{CD}_3\text{OD}$ .

**Figure S29:**  $^1\text{H}$ -NMR spectrum of compound **8** in  $\text{CD}_3\text{OD}$ .

**Figure S30:**  $^{13}\text{C}$  spectrum of compound **8** in  $\text{CD}_3\text{OD}$ .

**Figure S31:**  $^1\text{H}$ - $^1\text{H}$  COSY spectrum of compound **8** in  $\text{CD}_3\text{OD}$ .

**Figure S32:** Overlay of HSQC and HMBC spectra of compound **8** in  $\text{CD}_3\text{OD}$ .

**Figure S33:** 2D  $^1\text{H}$ - $^1\text{H}$  NOESY spectrum of compound **8** in  $\text{CD}_3\text{OD}$ .

**Figure S34:**  $^1\text{H}$ -NMR spectrum of compound **9** in  $\text{CD}_3\text{OD}$ .

**Figure S35:**  $^{13}\text{C}$  spectrum of compound **9** in  $\text{CD}_3\text{OD}$ .

**Figure S36:**  $^1\text{H}$ - $^1\text{H}$  COSY spectrum of compound **9** in  $\text{CD}_3\text{OD}$ .

**Figure S37:** Overlay of HSQC and HMBC spectra of compound **9** in  $\text{CD}_3\text{OD}$ .

**Figure S38:** 2D  $^1\text{H}$ - $^1\text{H}$  NOESY spectrum of compound **9** in  $\text{CD}_3\text{OD}$ .

**Figure S39:**  $^1\text{H}$  NMR spectrum of compound **10** in  $\text{CD}_3\text{OD}$ .

**Figure S40:**  $^1\text{H}$ - $^1\text{H}$ -COSY spectrum of compound **10** in  $\text{CD}_3\text{OD}$ .

**Figure S41:** HSQC (green) and HMBC (red) overlaid spectra of compound **10** in  $\text{CD}_3\text{OD}$ .

**Figure S42:** 2D  $^1\text{H}$ - $^1\text{H}$  NOESY spectrum of compound **10** in  $\text{CD}_3\text{OD}$ .

**Figure S43:**  $^1\text{H}$ -NMR spectrum of compound **11** in  $\text{CDCl}_3$ .

**Figure S44:** Overlay of HSQC and HMBC spectra of compound **11** in  $\text{CDCl}_3$ .

**Figure S45:**  $^1\text{H}$ -NMR spectrum of compound **12** in  $\text{CDCl}_3$ .

**Figure S46:** Overlay of HSQC and HMBC spectra of compound **12** in  $\text{CDCl}_3$ .

**Figure S47:**  $^1\text{H}$  NMR spectrum of compound **13** in  $\text{CD}_3\text{OD}$ .

**Figure S48:**  $^1\text{H}$ - $^1\text{H}$ -COSY spectrum of compound **13** in  $\text{CD}_3\text{OD}$ .

**Figure S49:** HSQC (green) and HMBC (red) overlaid spectra of compound **13** in  $\text{CD}_3\text{OD}$ .

**Figure S50:** 2D  $^1\text{H}$ - $^1\text{H}$  NOESY spectrum of compound **13** in  $\text{CD}_3\text{OD}$ .

**Figure S51:**  $^1\text{H}$  NMR spectrum of compound **14** in  $\text{CD}_3\text{OD}$ .

**Figure S52:**  $^1\text{H}$ - $^1\text{H}$ -COSY spectrum of compound **14** in  $\text{CD}_3\text{OD}$ .

**Figure S53:** HSQC (green) and HMBC (red) overlaid spectra of compound **14** in  $\text{CD}_3\text{OD}$ .

**Figure S54:** 2D  $^1\text{H}$ - $^1\text{H}$  NOESY spectrum of compound **14** in  $\text{CD}_3\text{OD}$ .

**Figure S55:**  $^1\text{H}$  NMR spectrum of compound **15** in  $\text{CD}_3\text{OD}$ .

**Figure S56:**  $^1\text{H}$ - $^1\text{H}$ -COSY spectrum of compound **15** in  $\text{CD}_3\text{OD}$ .

**Figure S57:** HSQC (green) and HMBC (red) overlaid spectra of compound **15** in  $\text{CD}_3\text{OD}$ .

**Figure S58:** 2D  $^1\text{H}$ - $^1\text{H}$  NOESY spectrum of compound **15** in  $\text{CD}_3\text{OD}$ .

**Figure S59:**  $^1\text{H}$  NMR spectrum of compound **16** in  $\text{CD}_3\text{OD}$ .

**Figure S60:**  $^1\text{H}$ - $^1\text{H}$ -COSY spectrum of compound **16** in  $\text{CD}_3\text{OD}$ .

**Figure S61:** HSQC (green) and HMBC (red) overlaid spectra of compound **16** in  $\text{CD}_3\text{OD}$ .

**Figure S62:** ECD spectra in MeOH of compounds **2**, **3**, **5**, **8-10**.

**Figure S63:** Overlay of  $^1\text{H}$  NMR spectra of **3** (a) and of the reaction of **3** with *p*-TSOH after 24 hours (b).

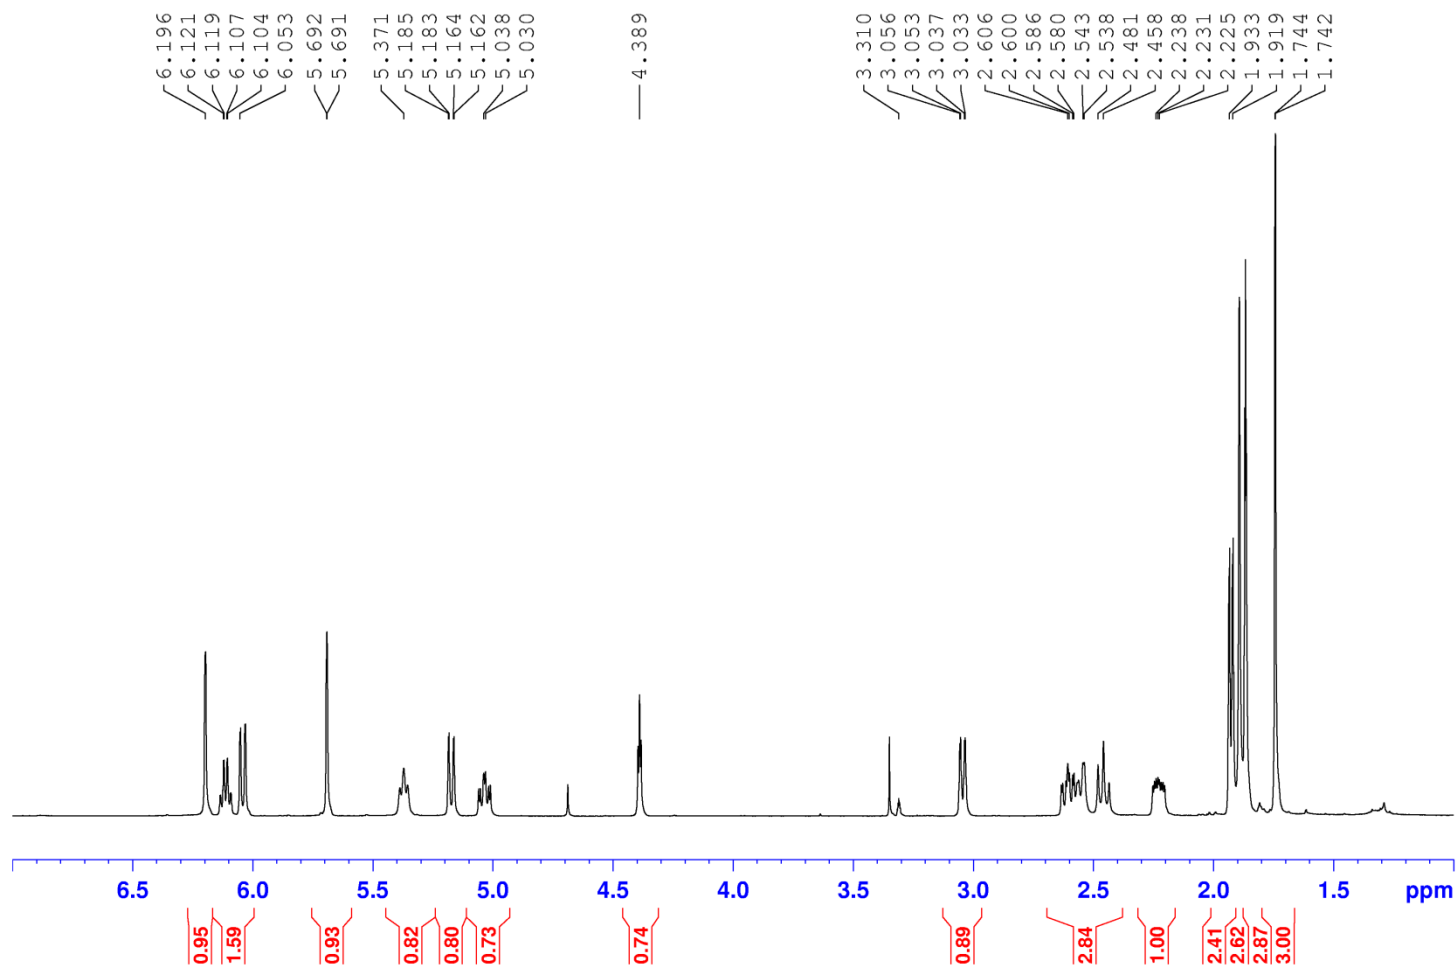

**Fig. S1.** <sup>1</sup>H NMR spectrum of nobilin 1 in CD<sub>3</sub>OD.

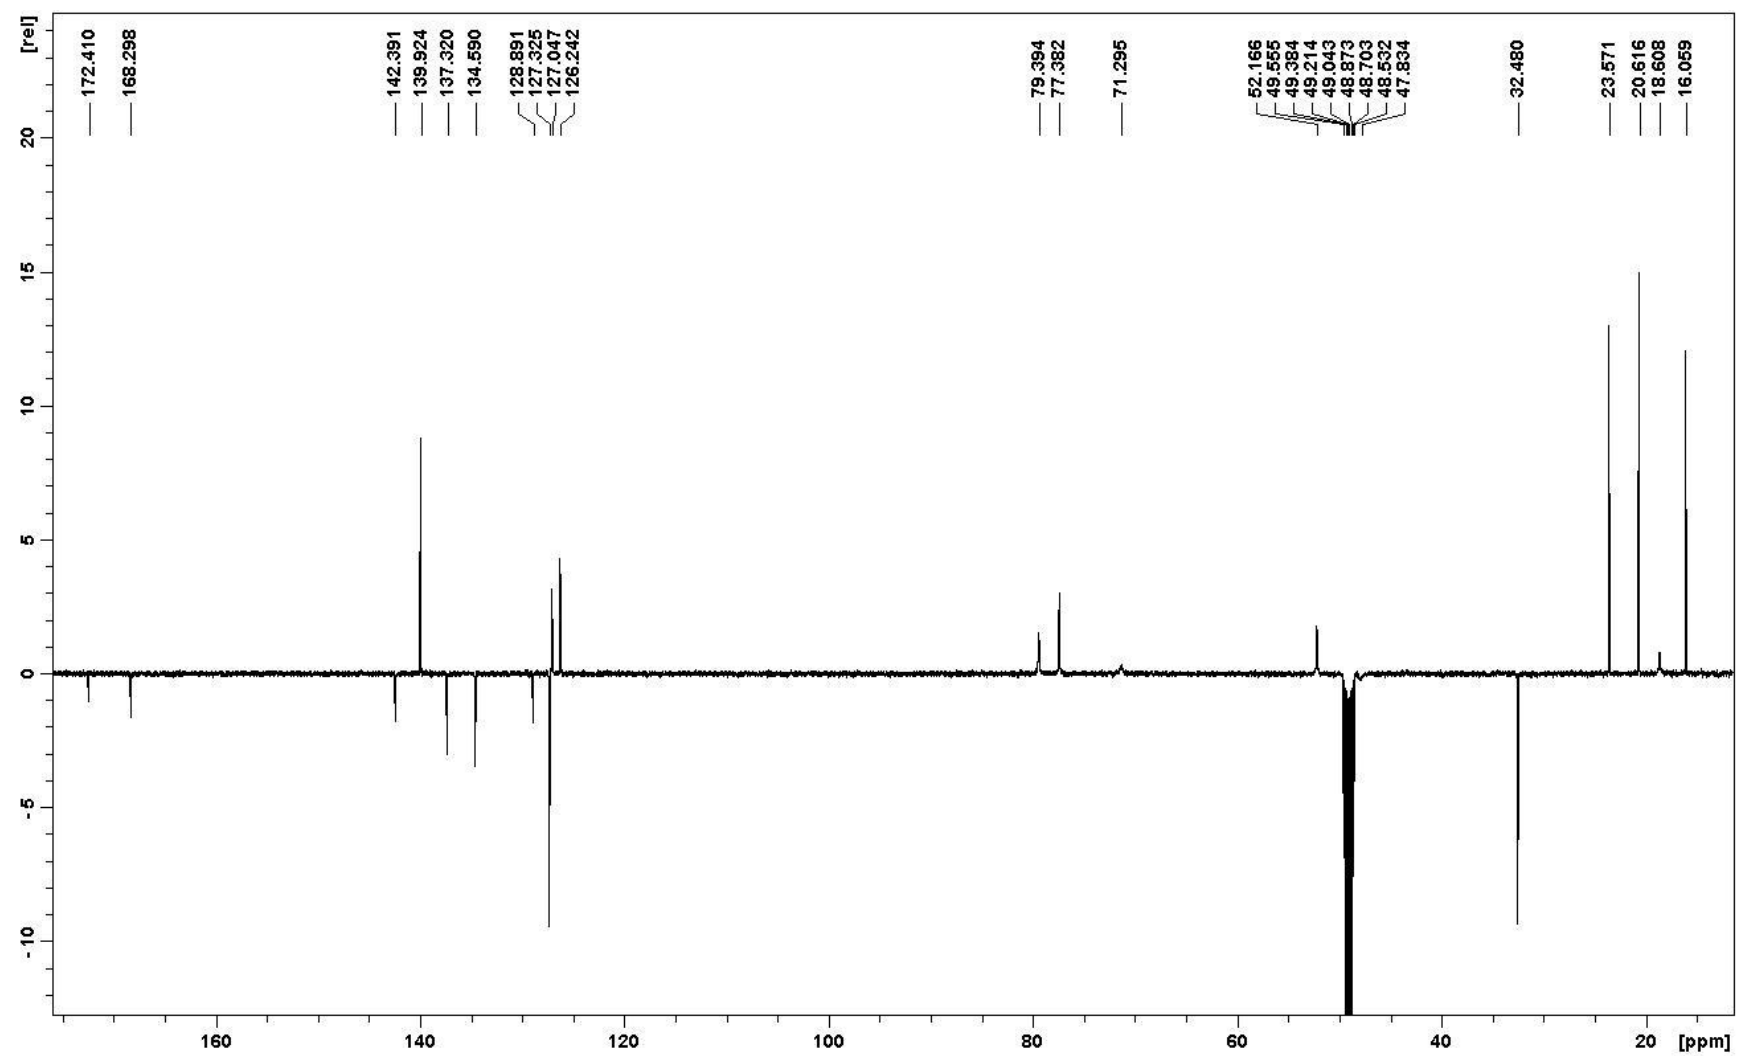

Fig. S2. <sup>13</sup>C spectrum of nobilin 1 in CD<sub>3</sub>OD.

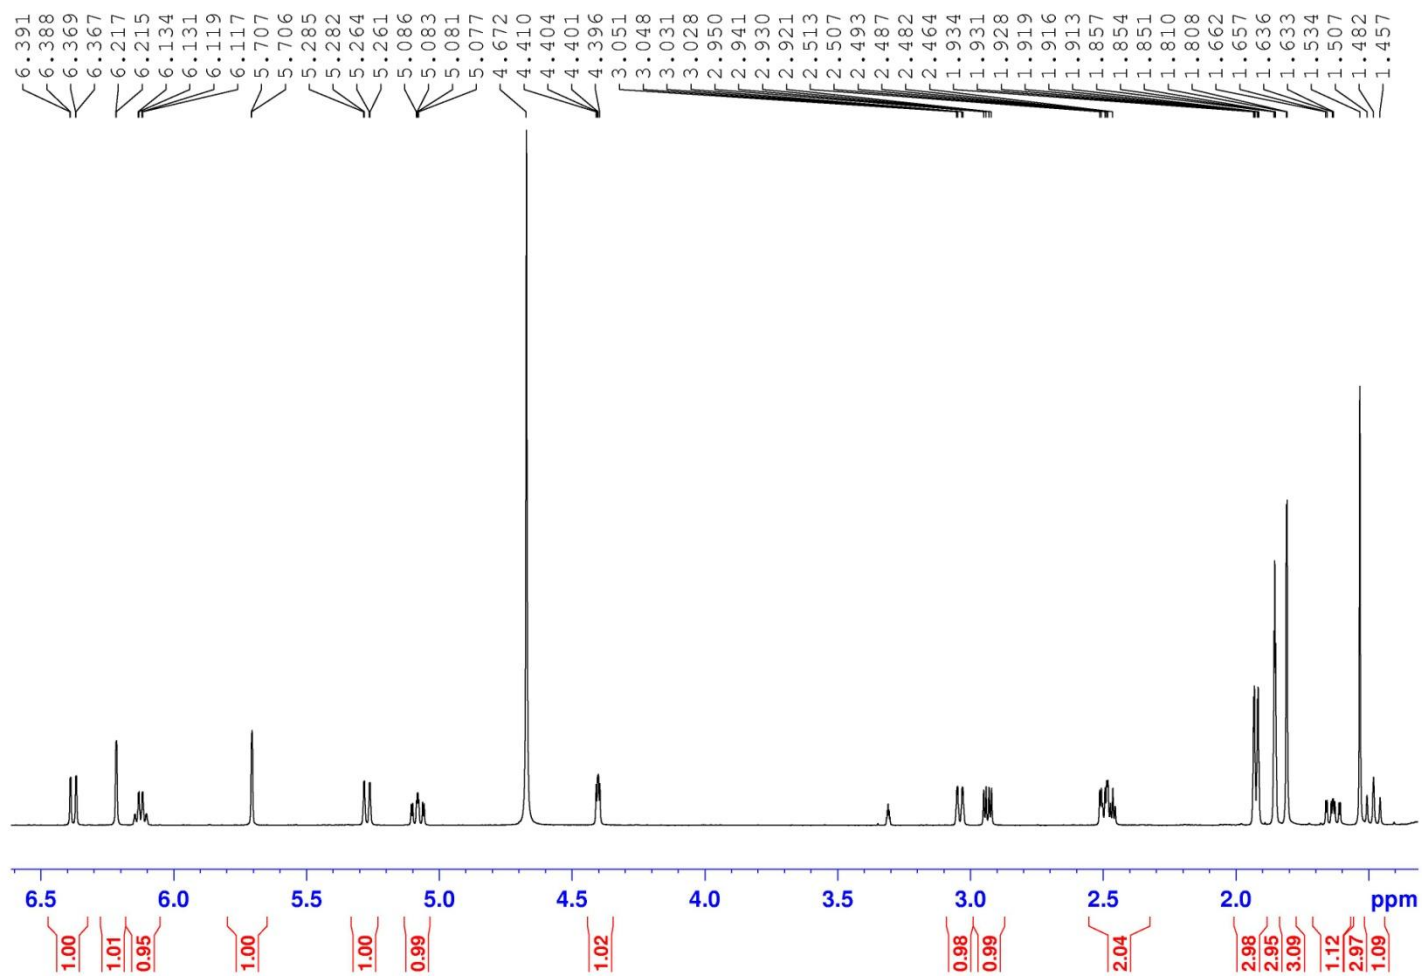

**Figure S3.** <sup>1</sup>H NMR spectrum of compound 2 in CD<sub>3</sub>OD.

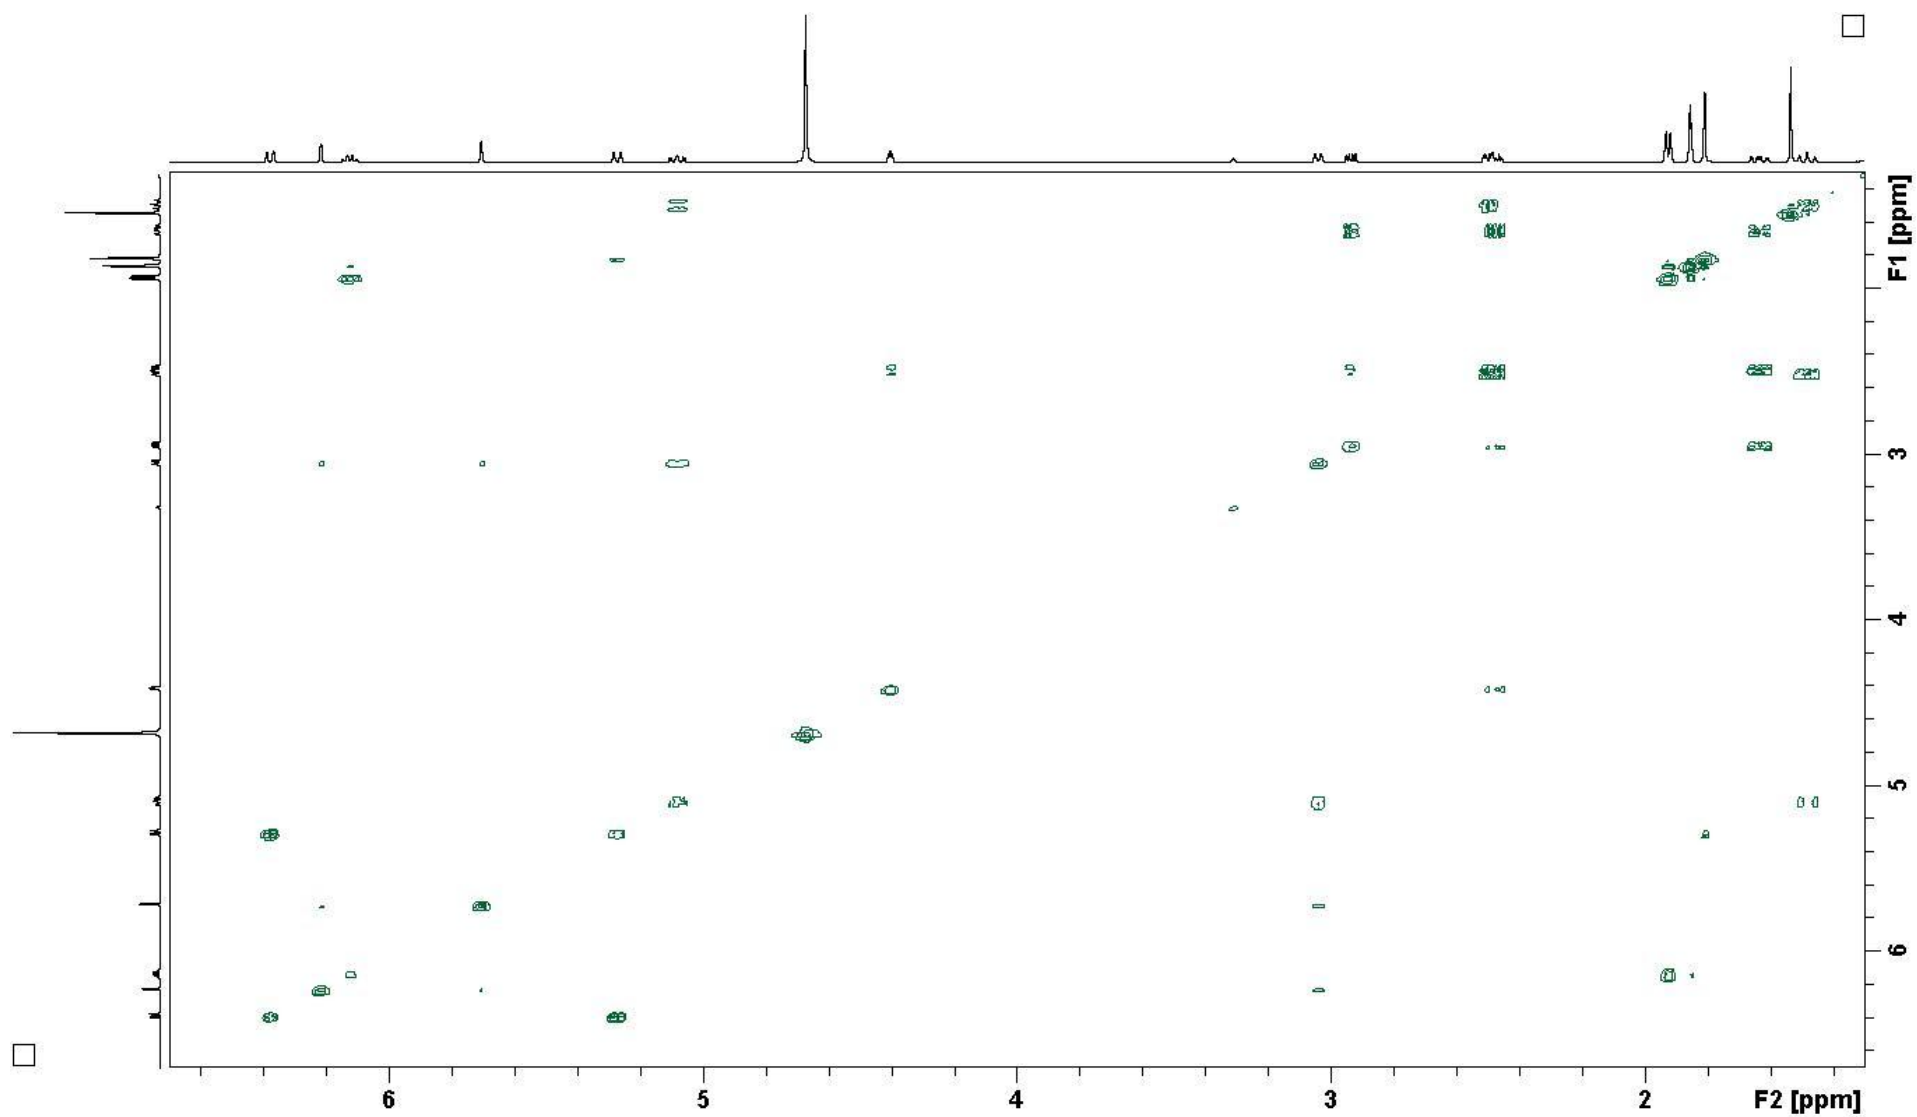

Figure S4.  $^1\text{H}$ - $^1\text{H}$ -COSY spectrum of compound 2 in  $\text{CD}_3\text{OD}$ .

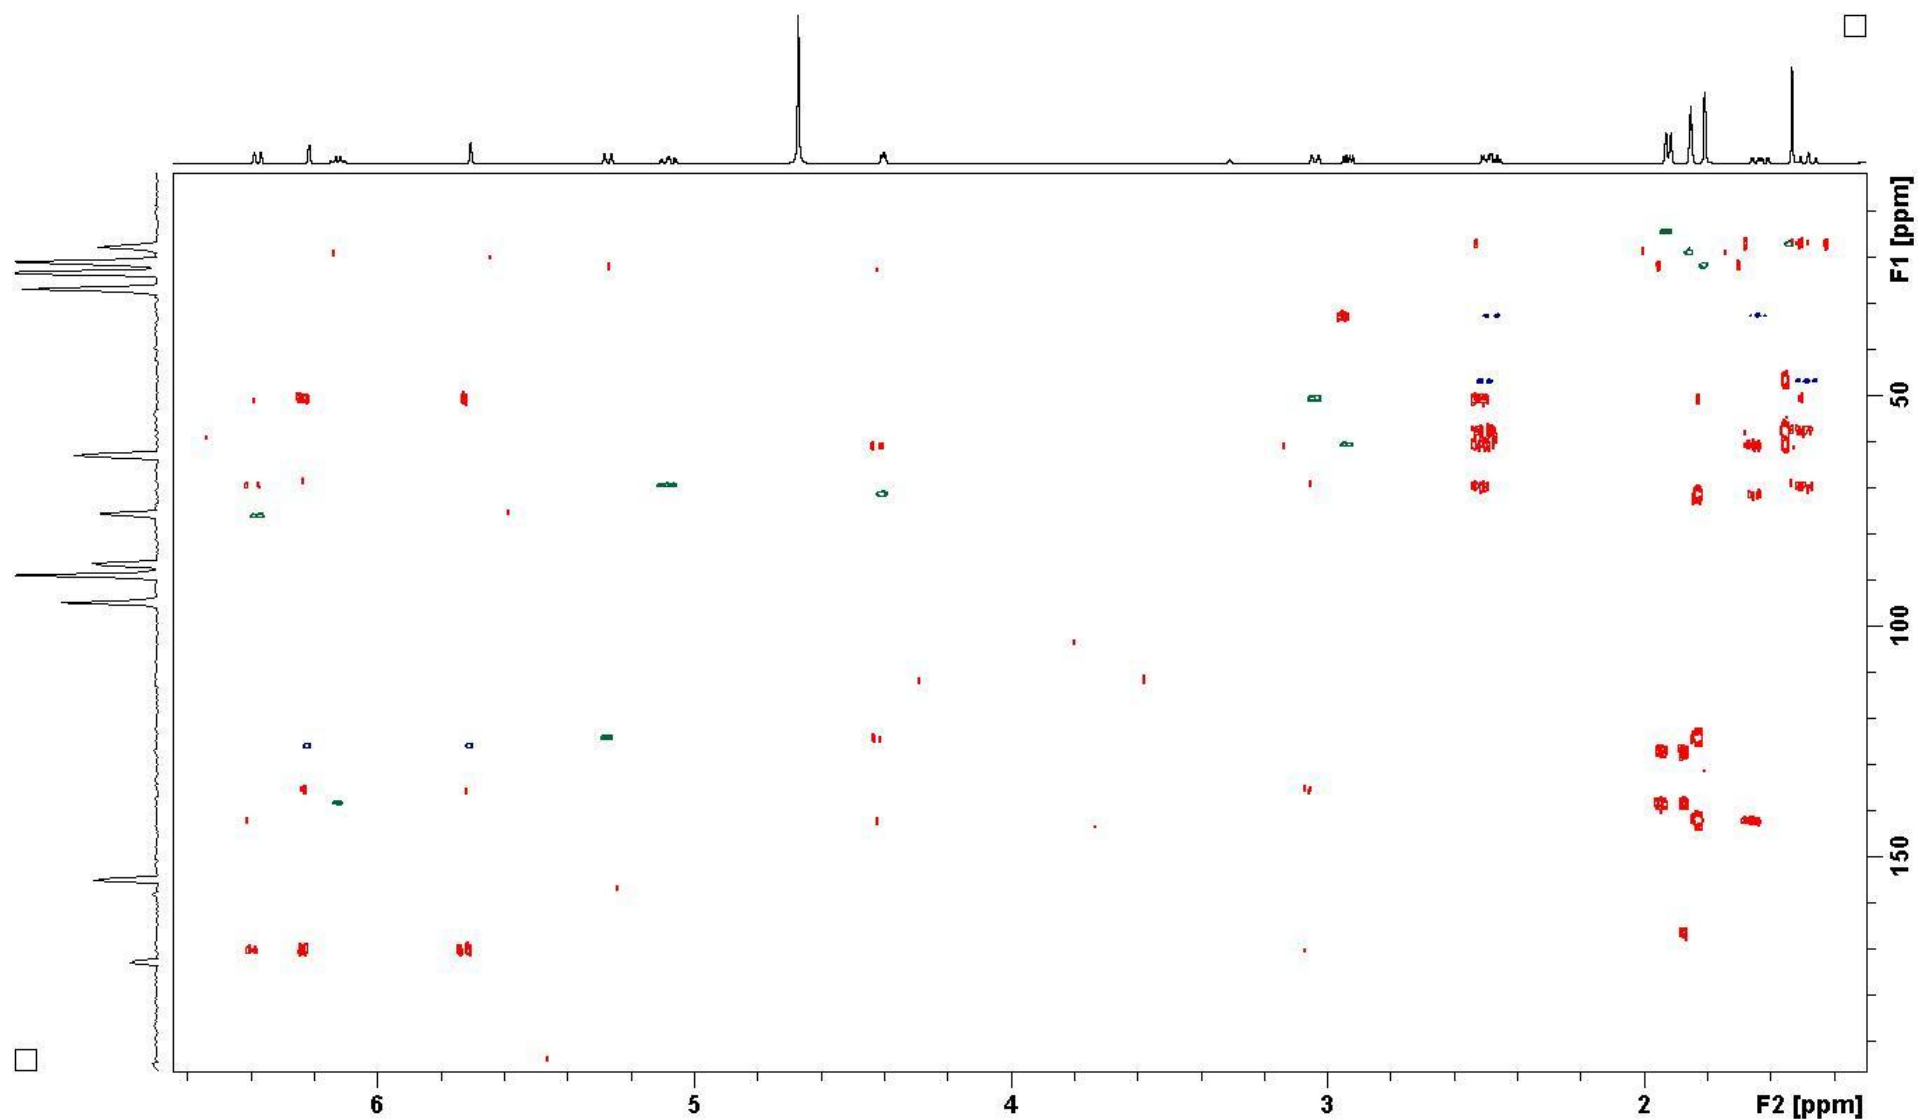

**Figure S5.** HSQC (green) and HMBC(red) overlaid spectra of compound 2 in CD<sub>3</sub>OD.

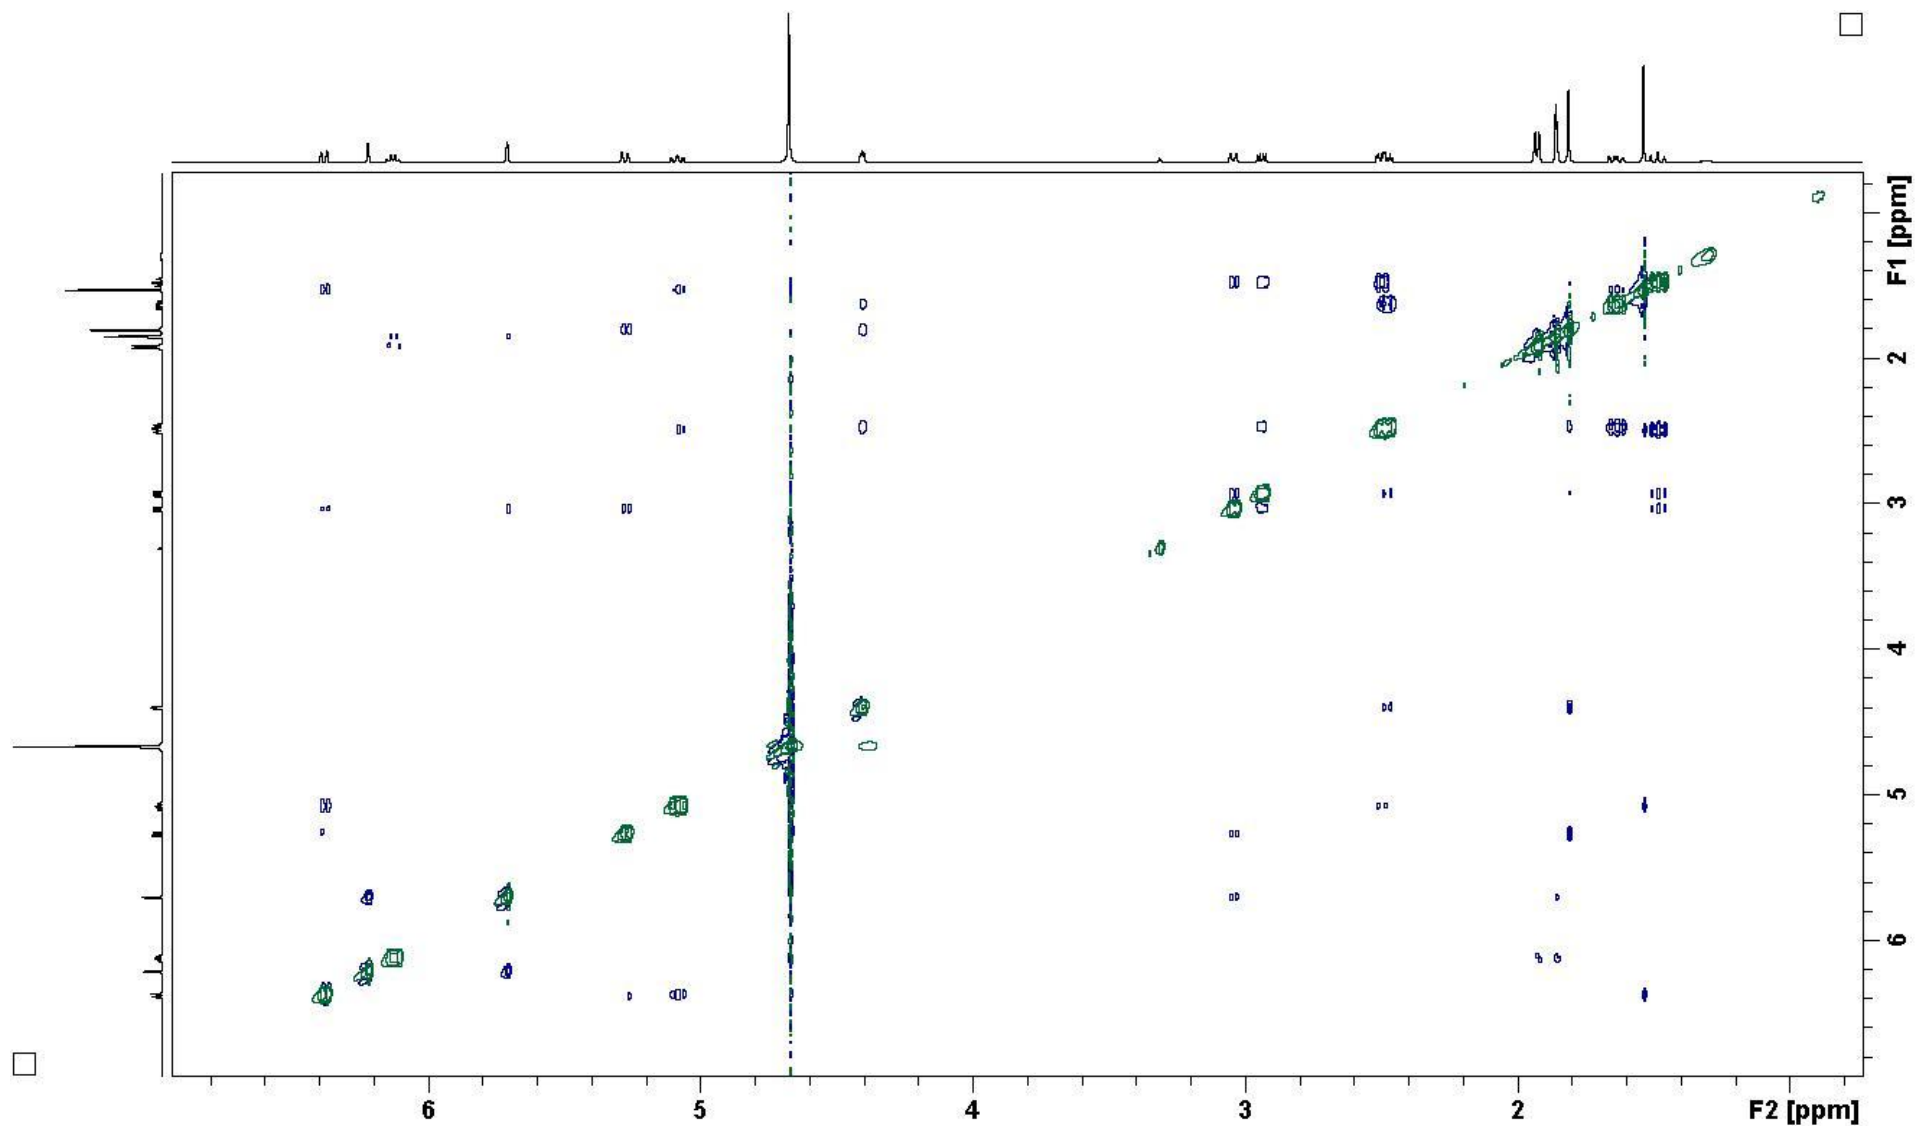

**Figure S6:** 2D  $^1\text{H}$ - $^1\text{H}$  NOESY spectrum of compound 2 in  $\text{CD}_3\text{OD}$ .

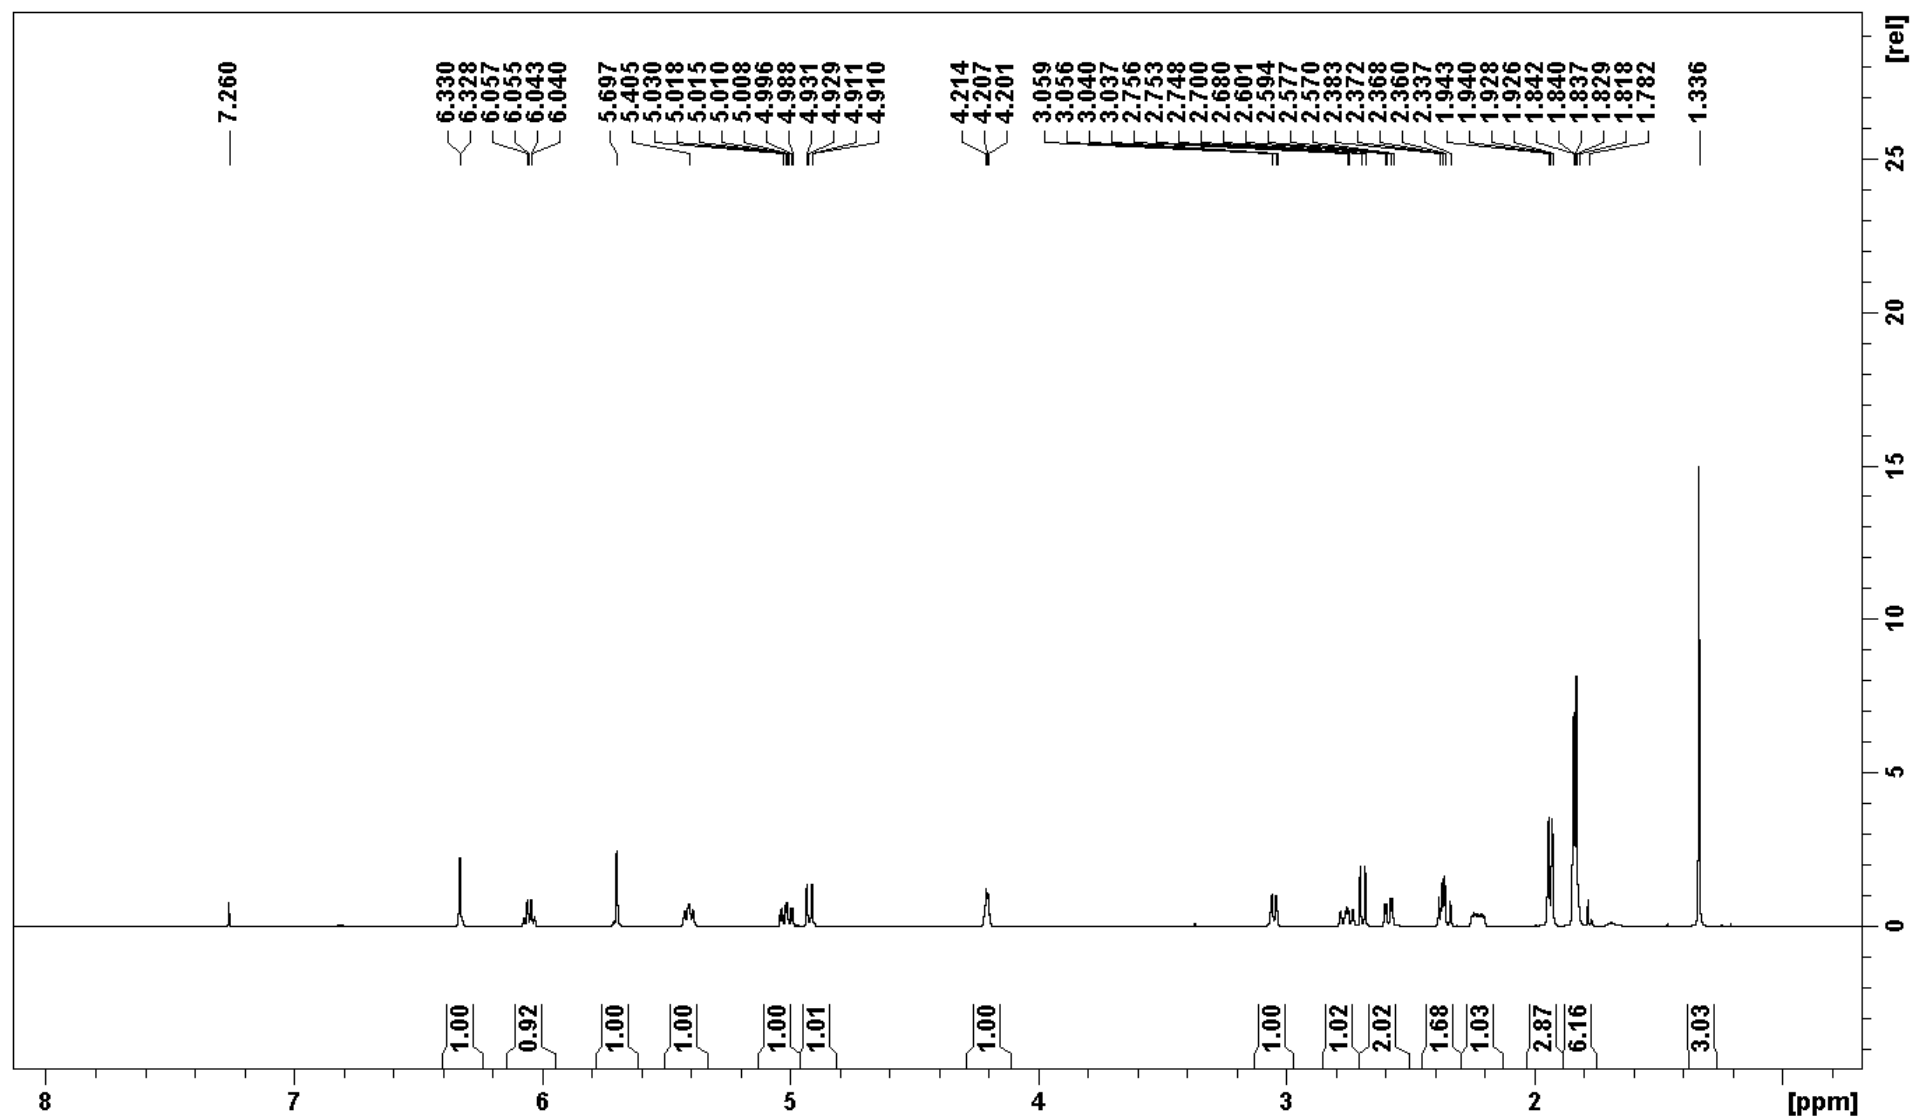

Figure S7. <sup>1</sup>H NMR spectrum of compound 3 in CDCl<sub>3</sub>.

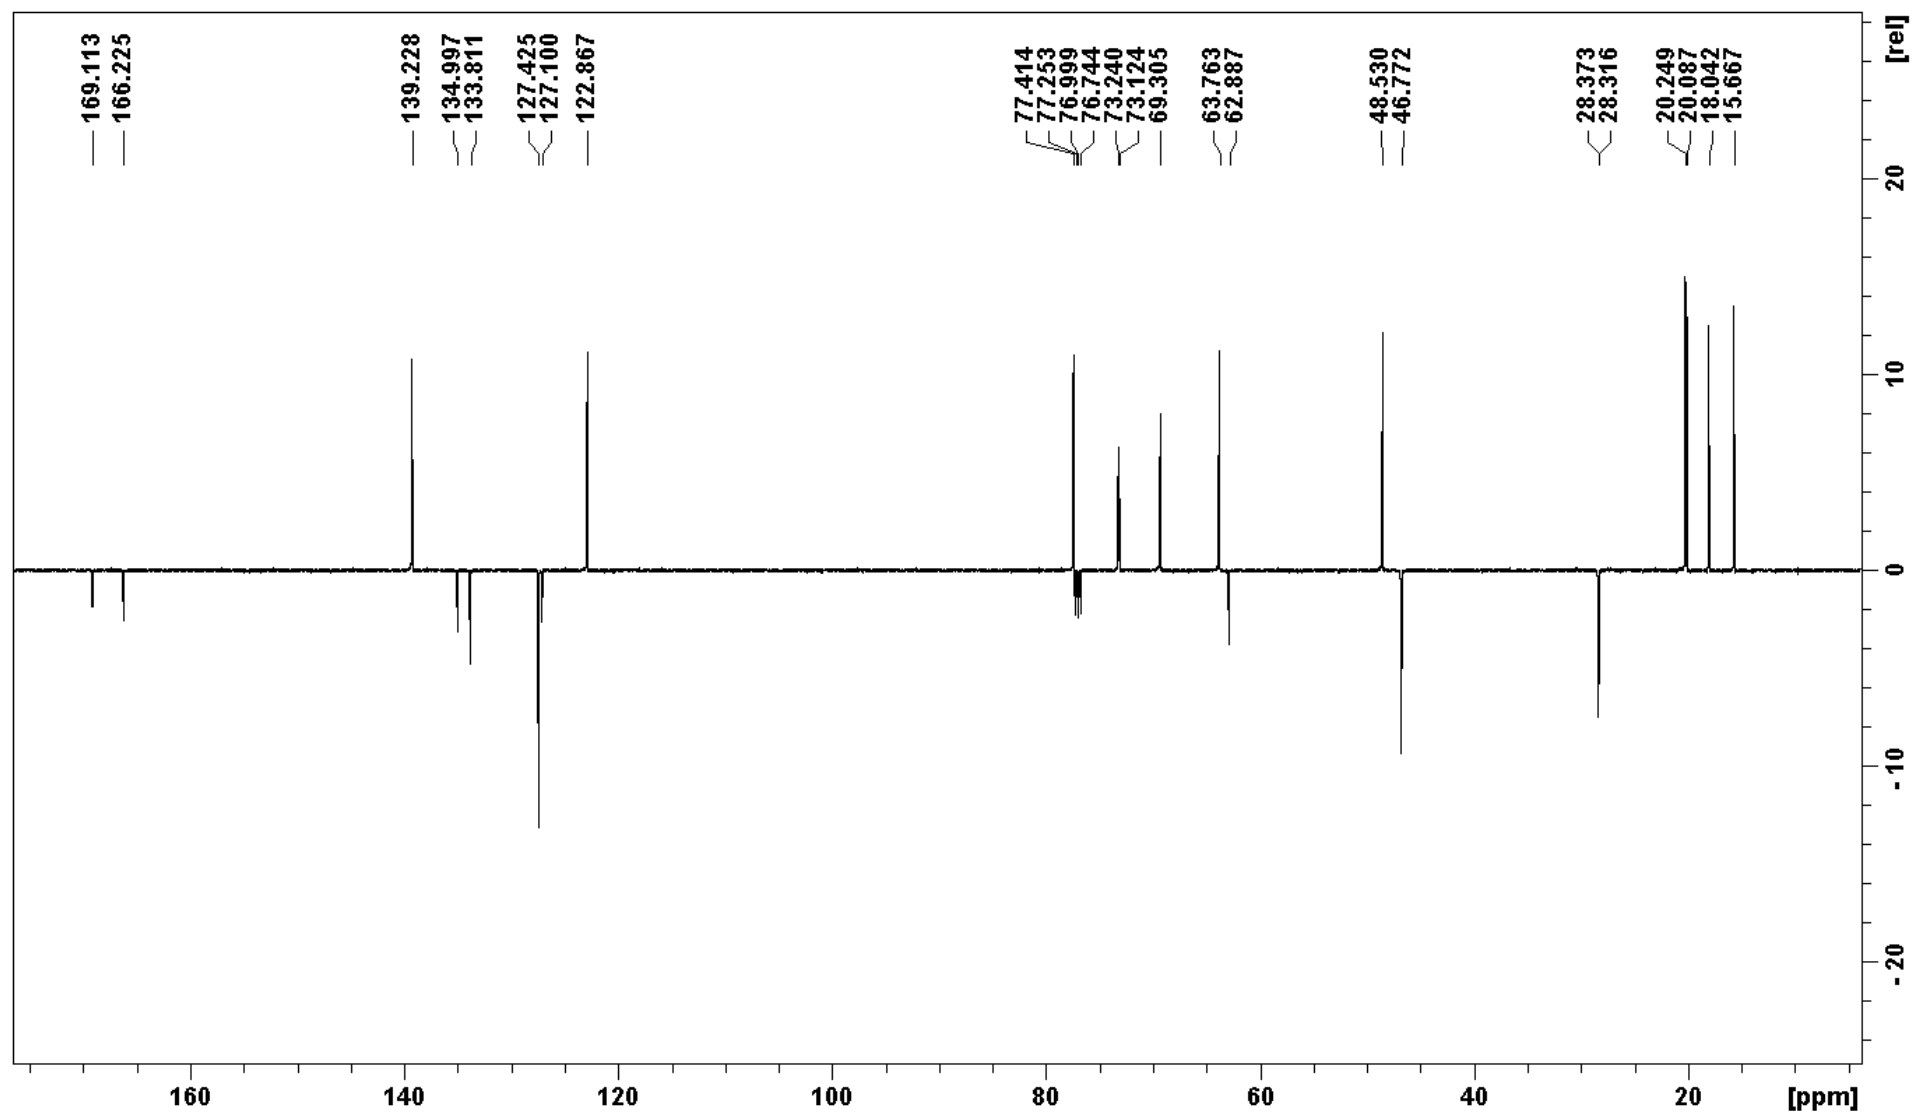

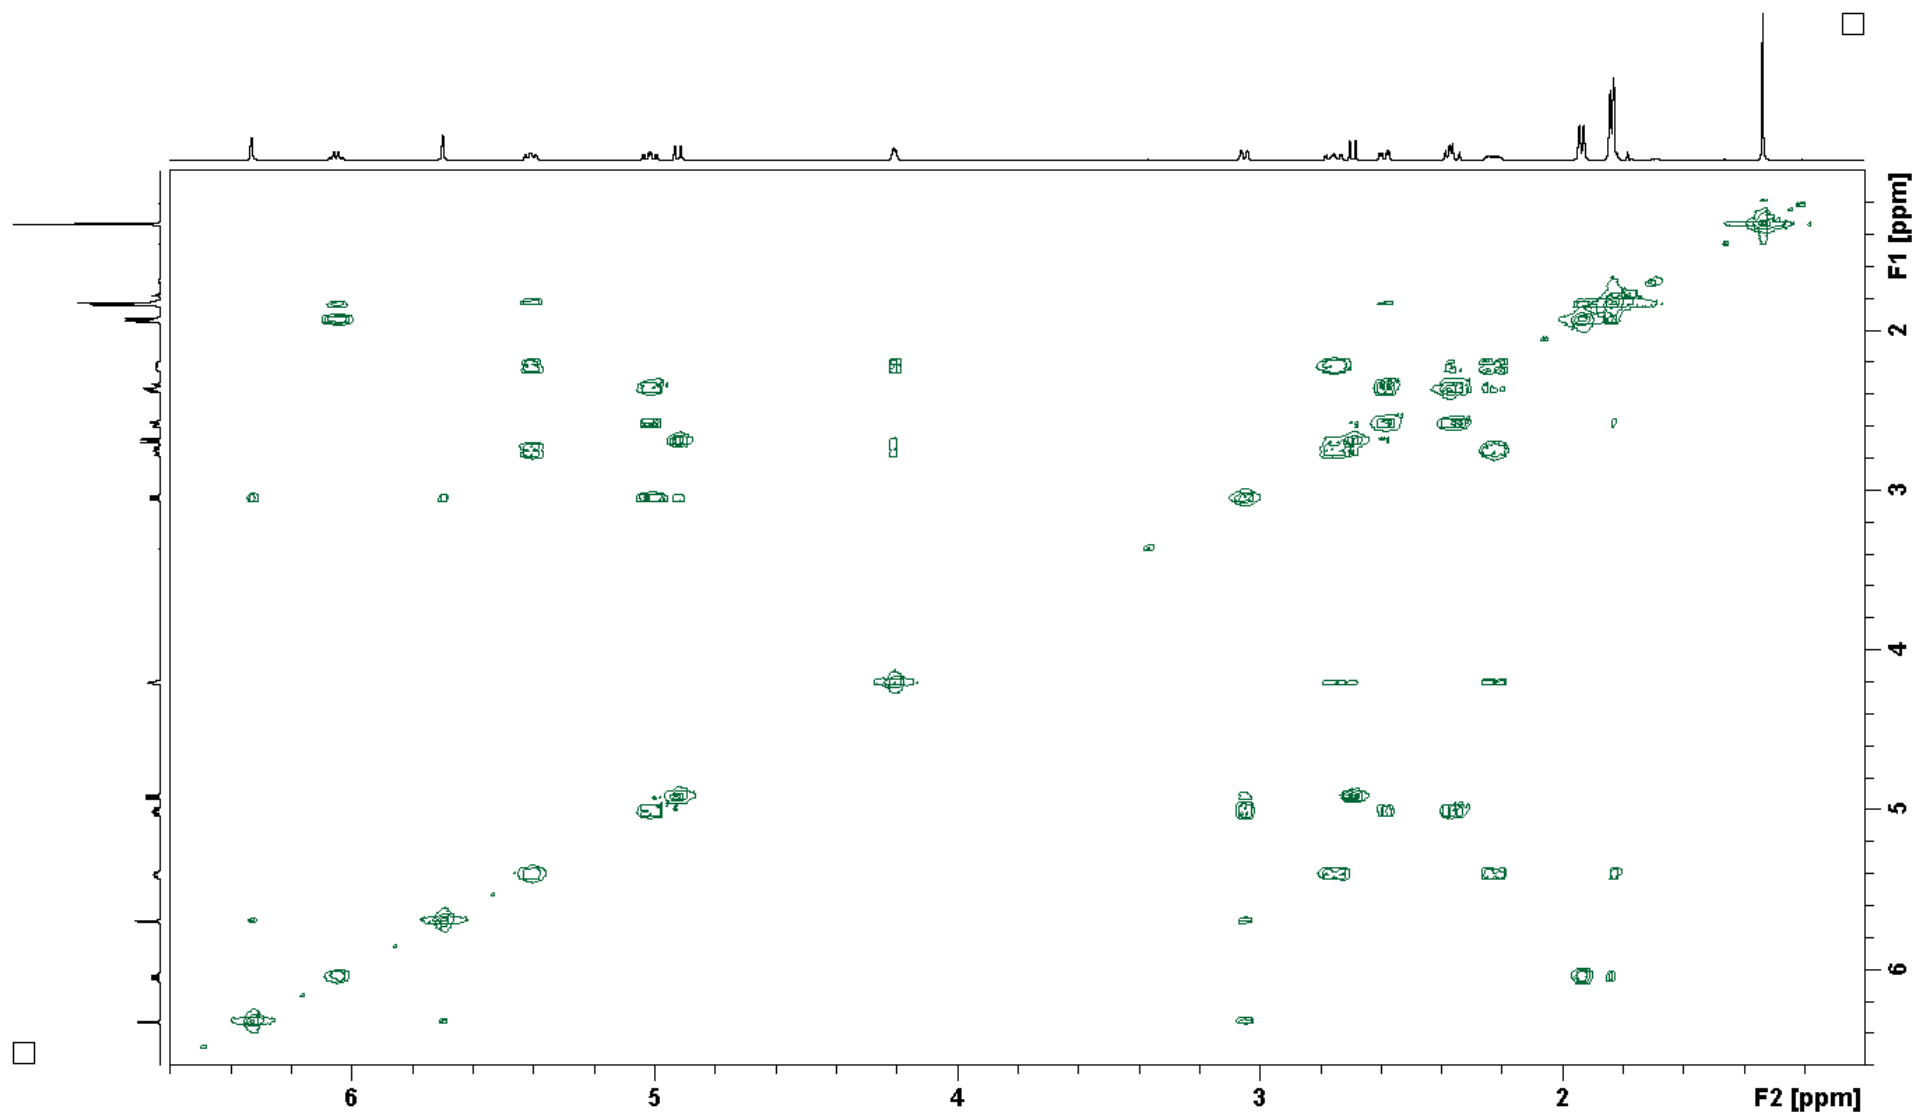

Figure S9.  $^1\text{H}$ - $^1\text{H}$ -COSY spectrum of compound 3 in  $\text{CDCl}_3$ .

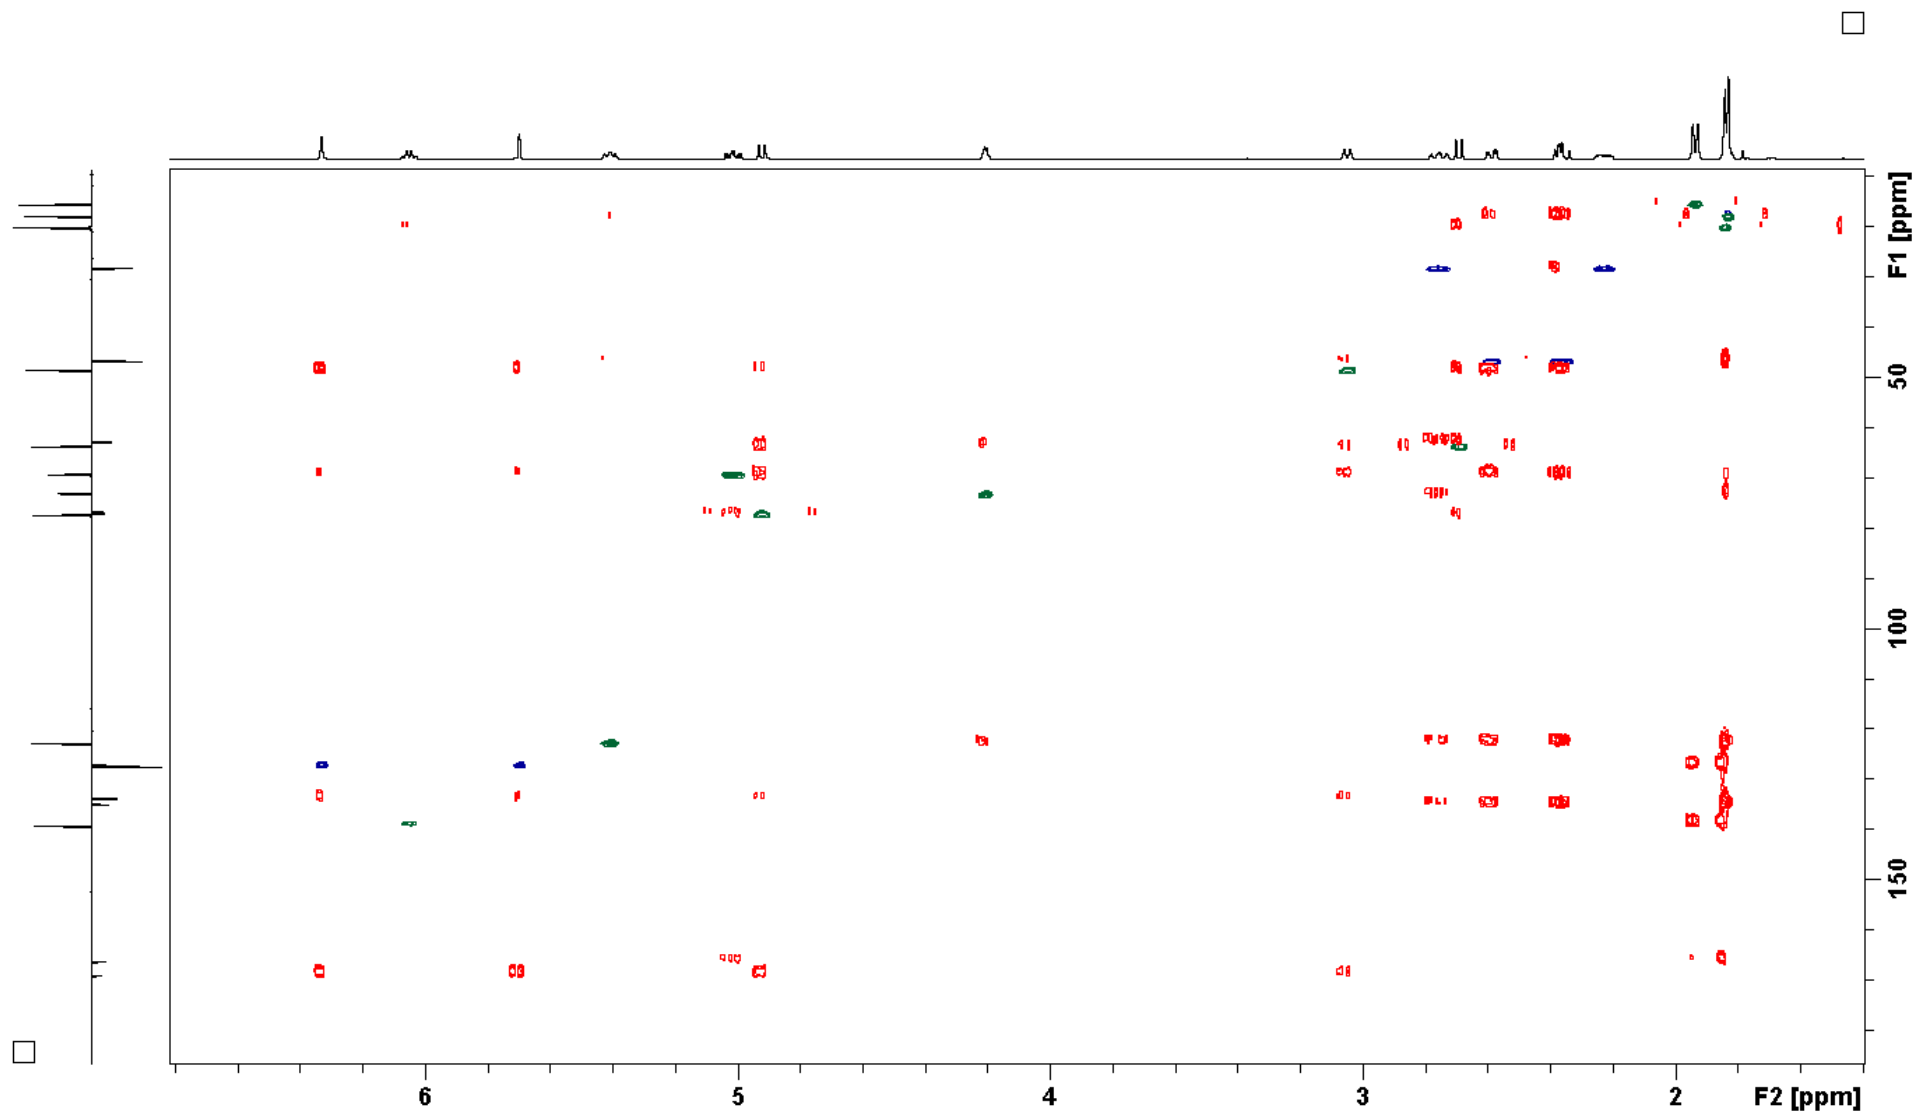

Figure S10. HSQC (green) and HMBC(red) overlaid spectra of compound 3 in CDCl<sub>3</sub>.

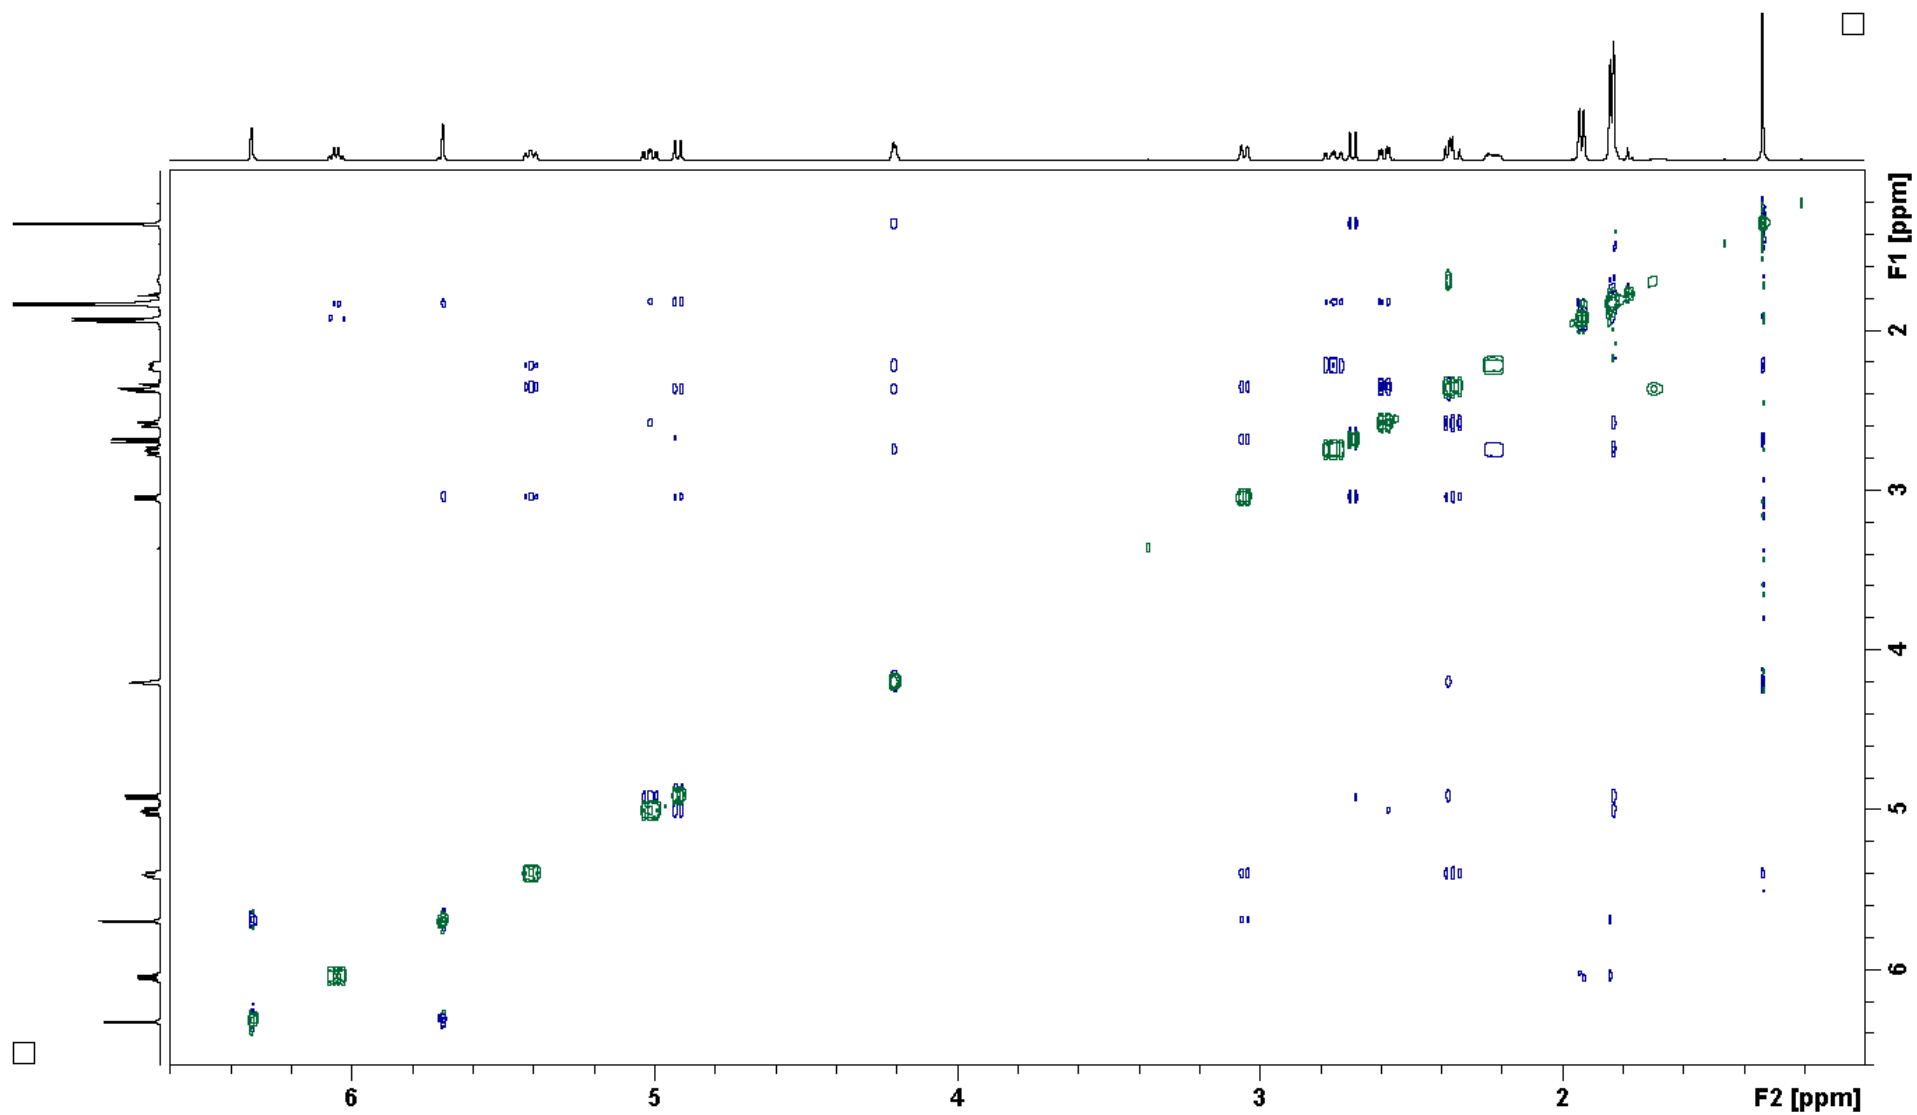

Figure S11: 2D  $^1\text{H}$ - $^1\text{H}$  NOESY spectrum of compound 3 in  $\text{CDCl}_3$ .

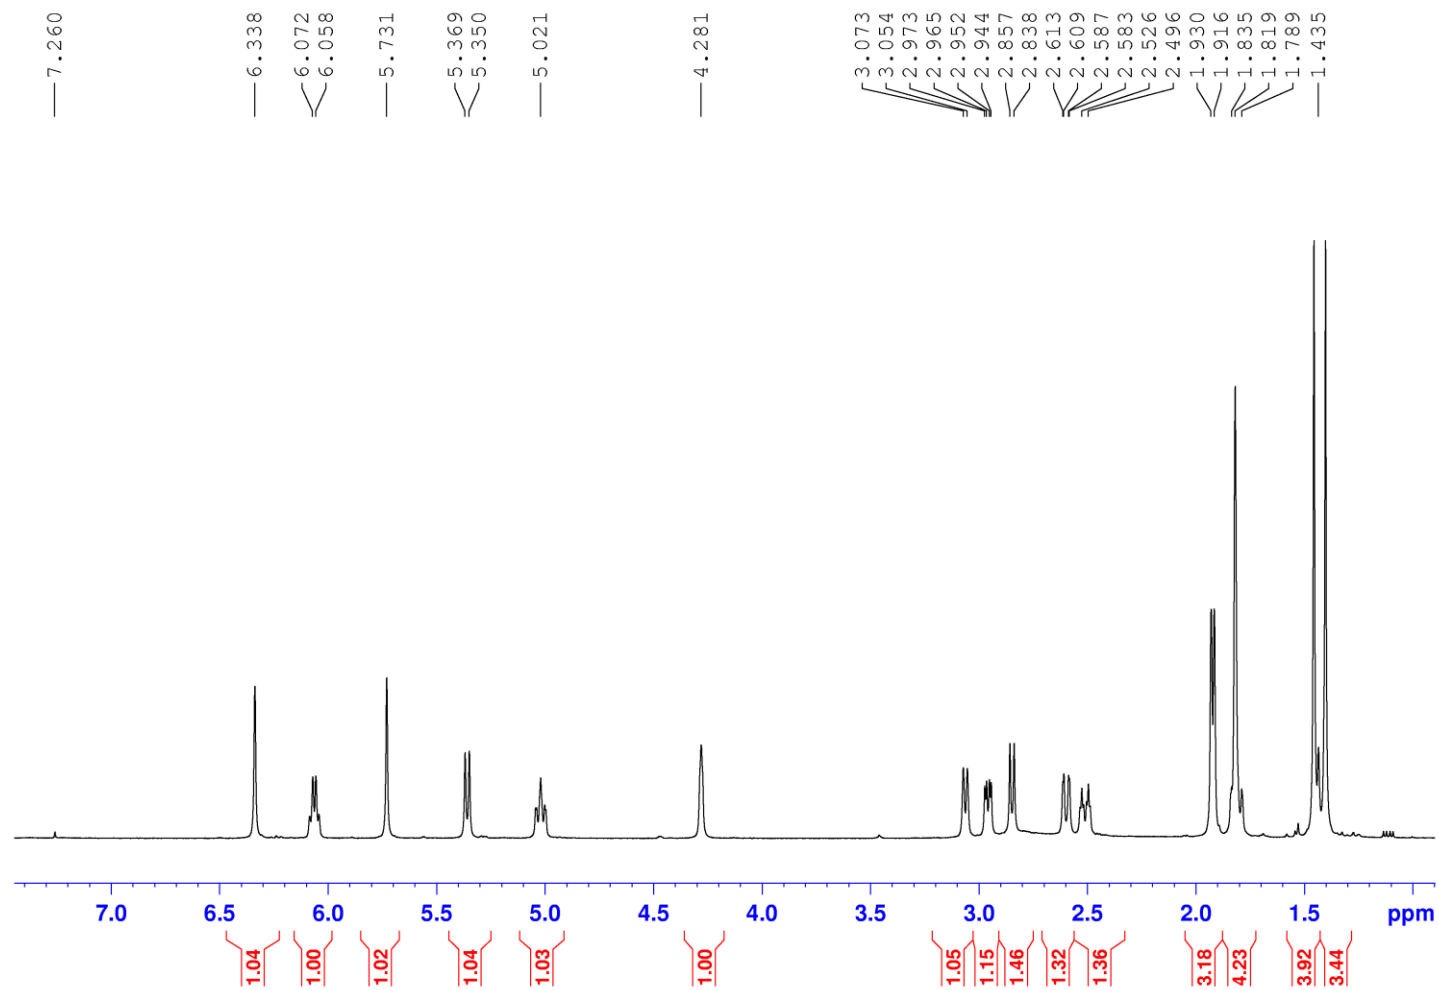

**Figure S12.** <sup>1</sup>H NMR spectrum of compound 4 in CDCl<sub>3</sub>.

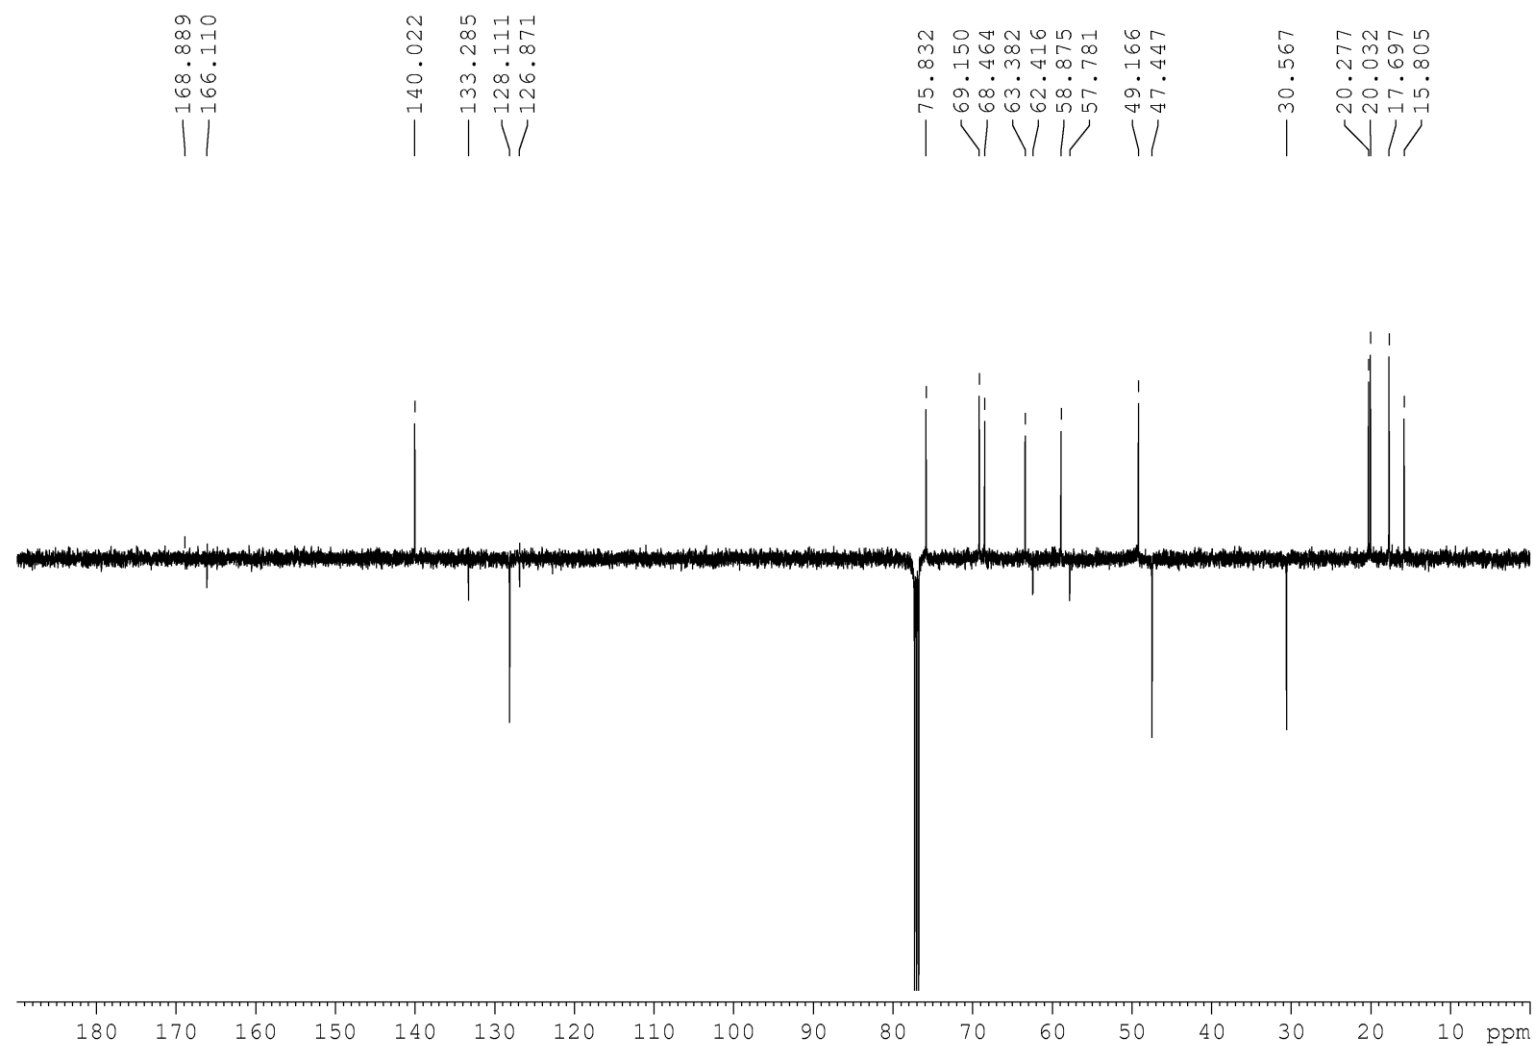

**Figure S13:** <sup>13</sup>C spectrum of compound **4** in CDCl<sub>3</sub>.

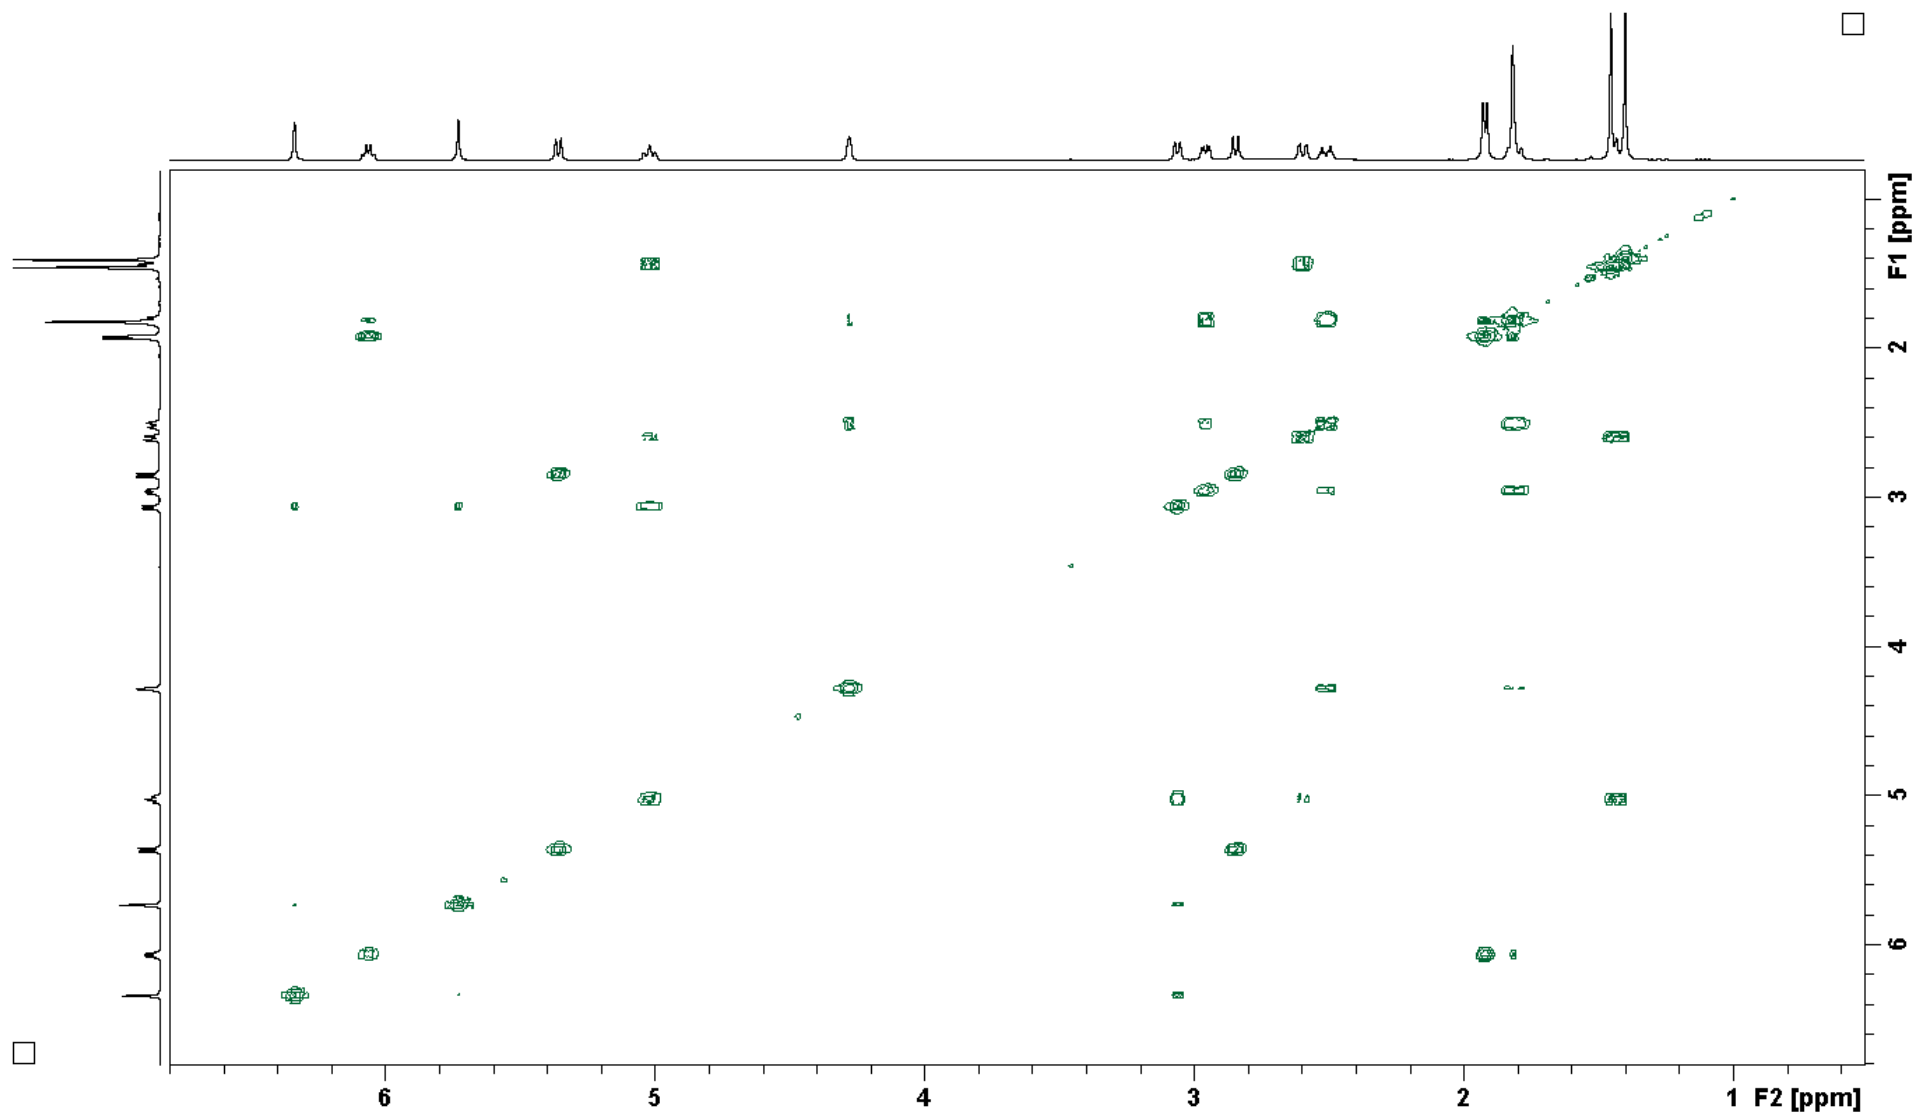

Figure S14.  $^1\text{H}$ - $^1\text{H}$ -COSY spectrum of compound **4** in  $\text{CDCl}_3$ .



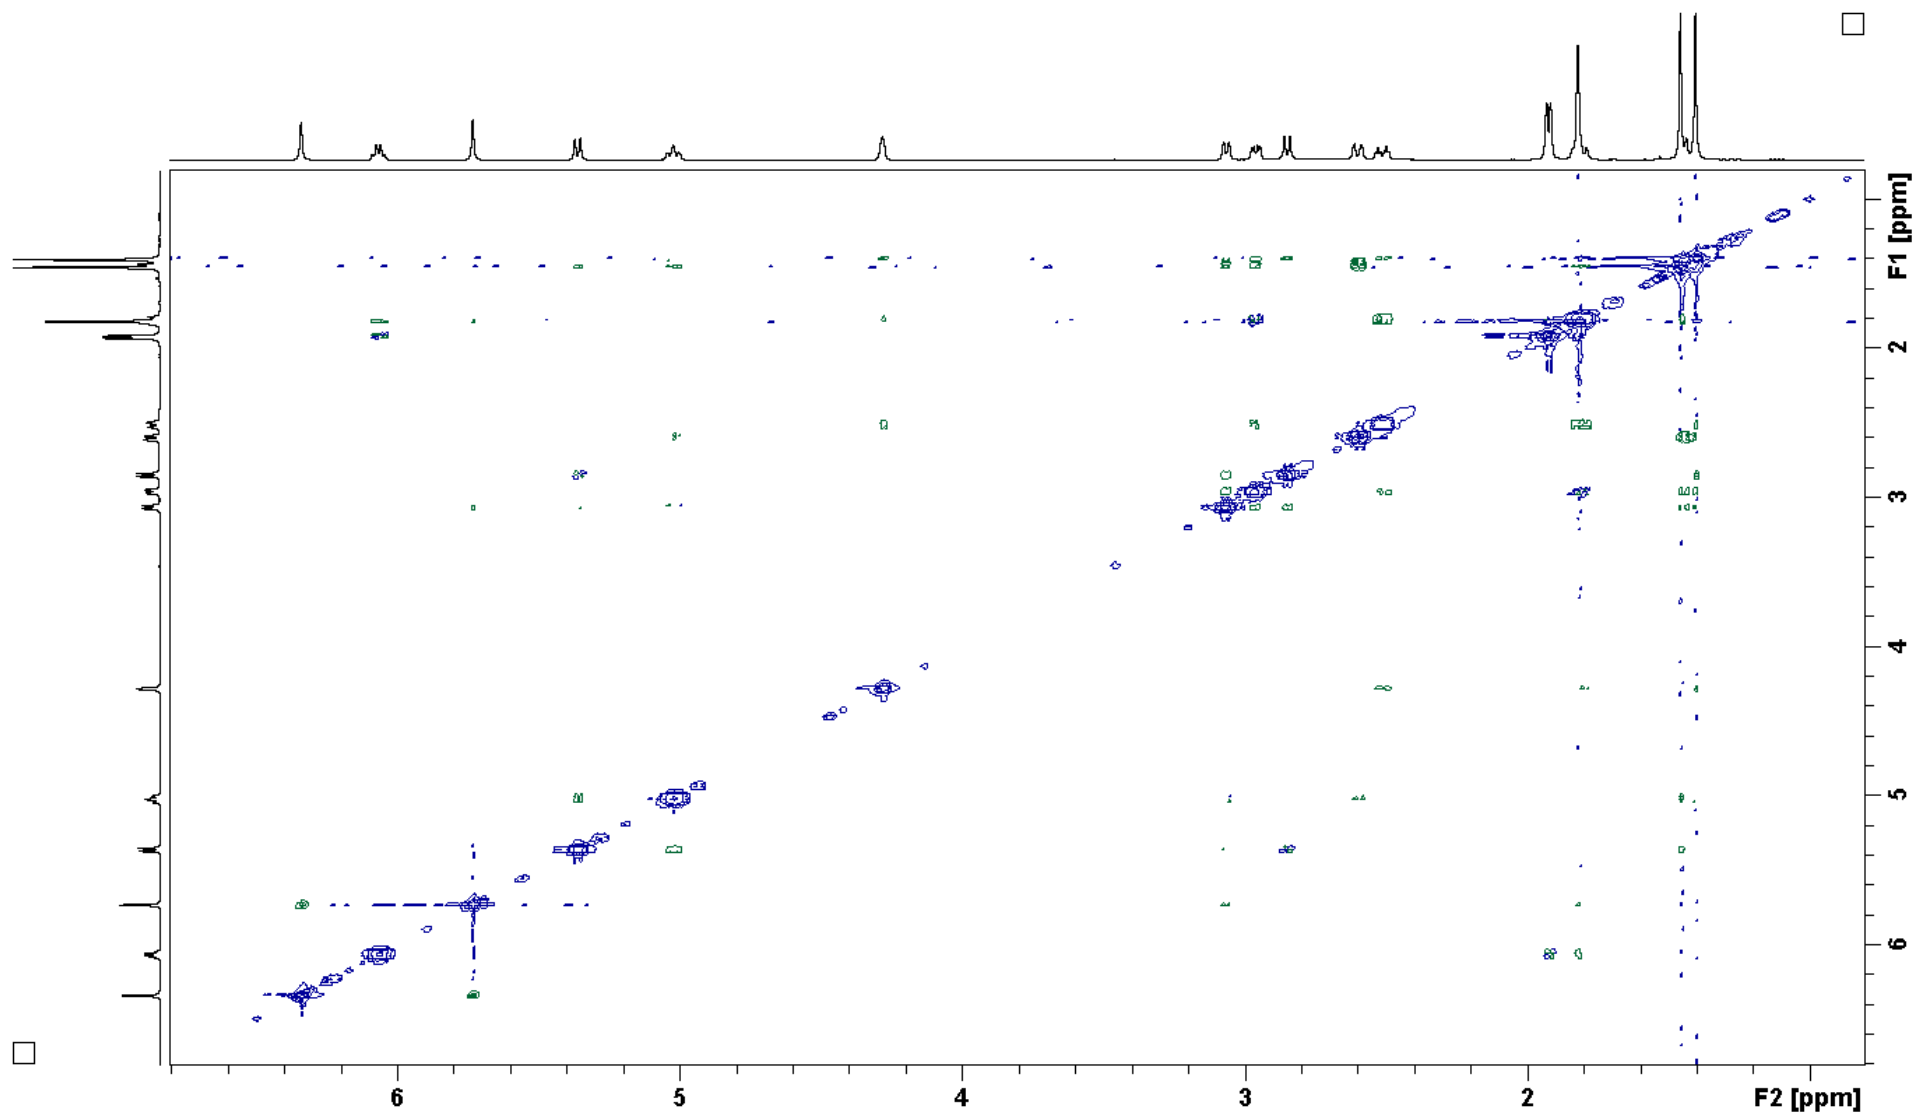

**Figure S16:** 2D  $^1\text{H}$ - $^1\text{H}$  NOESY spectrum of compound **4** in  $\text{CDCl}_3$ .

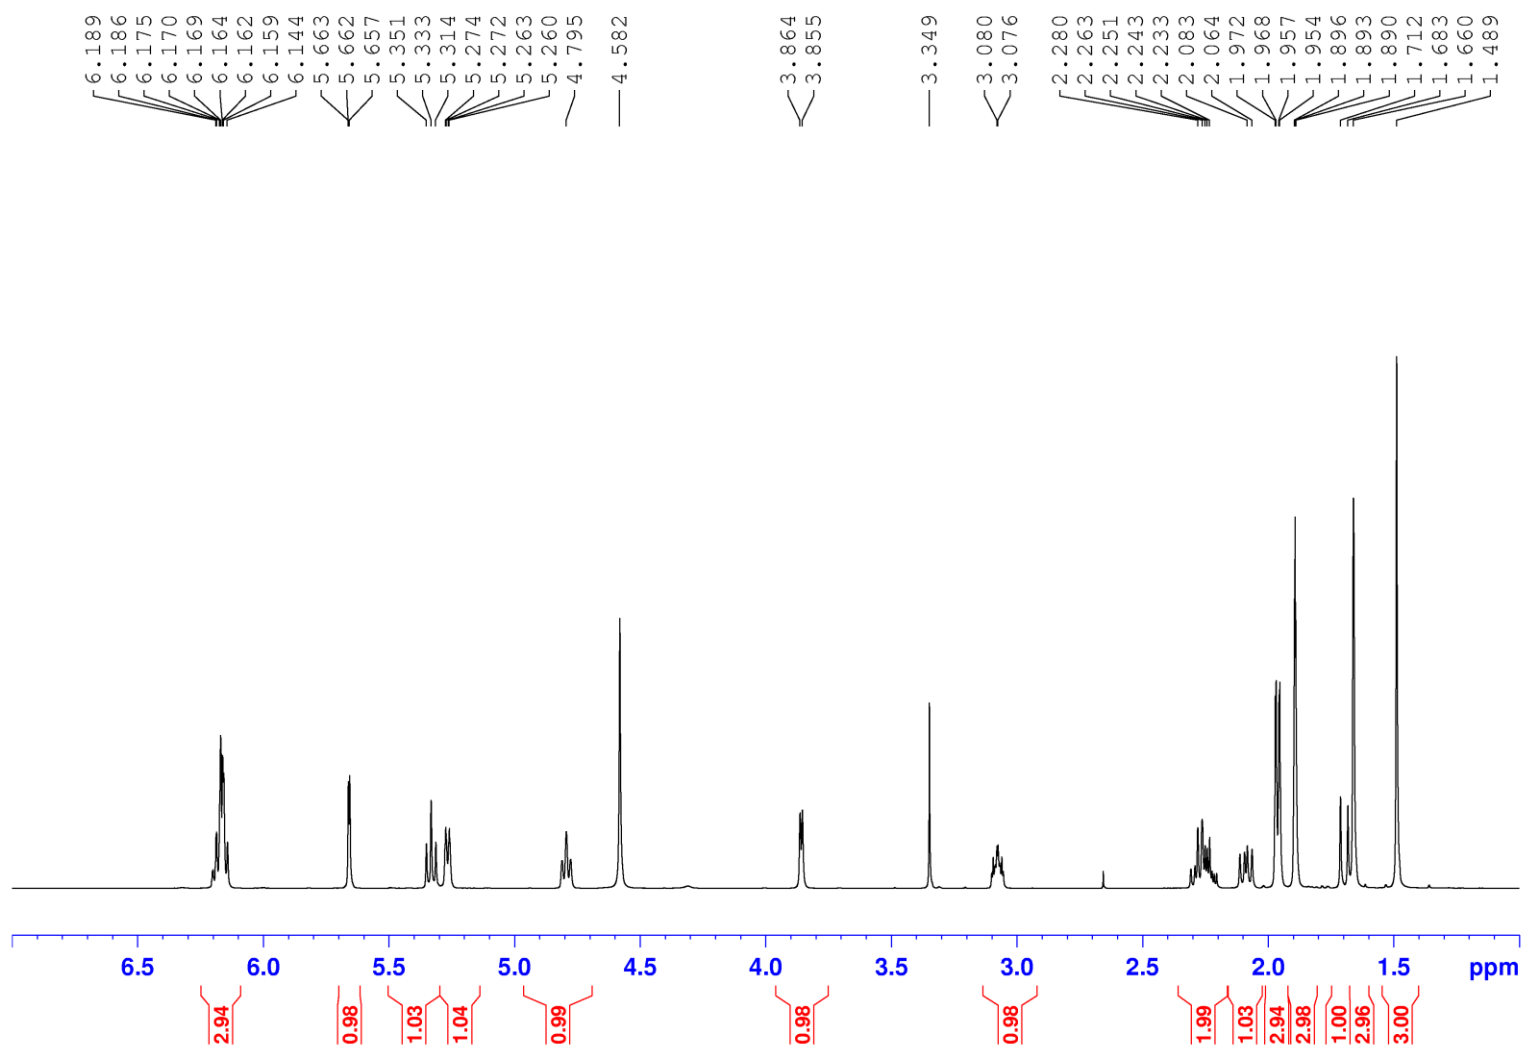

**Figure S17:** <sup>1</sup>H-NMR spectrum of compound **5** in CD<sub>3</sub>OD.

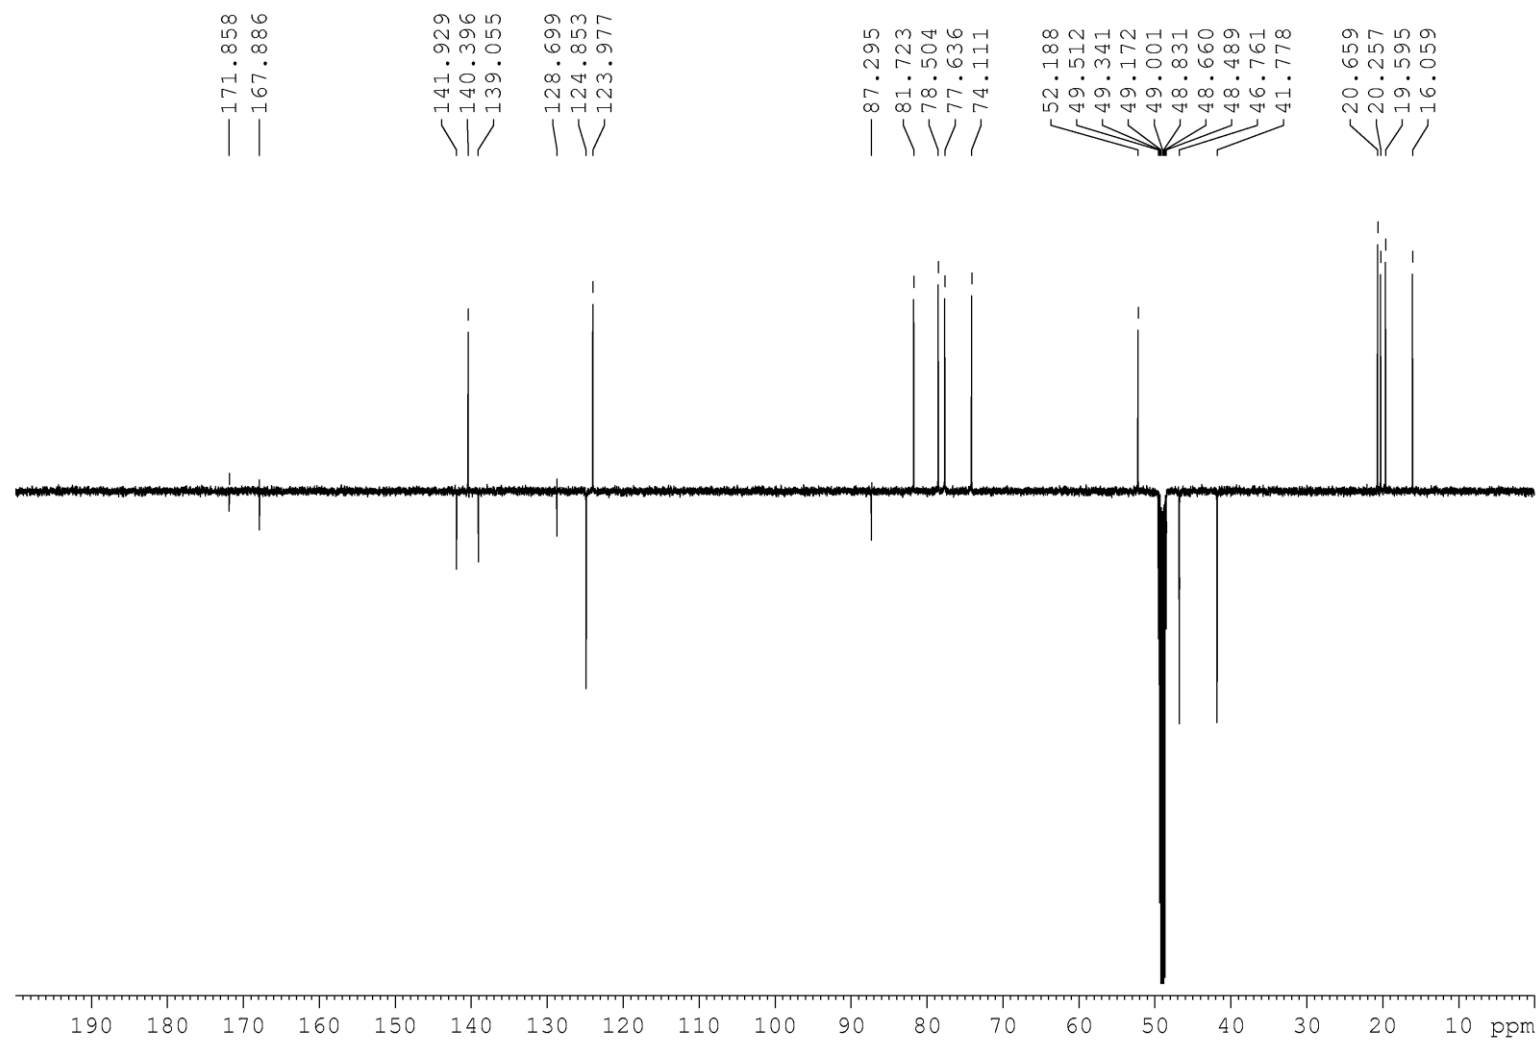

**Figure S18:** <sup>13</sup>C spectrum of compound 5 in CD<sub>3</sub>OD.

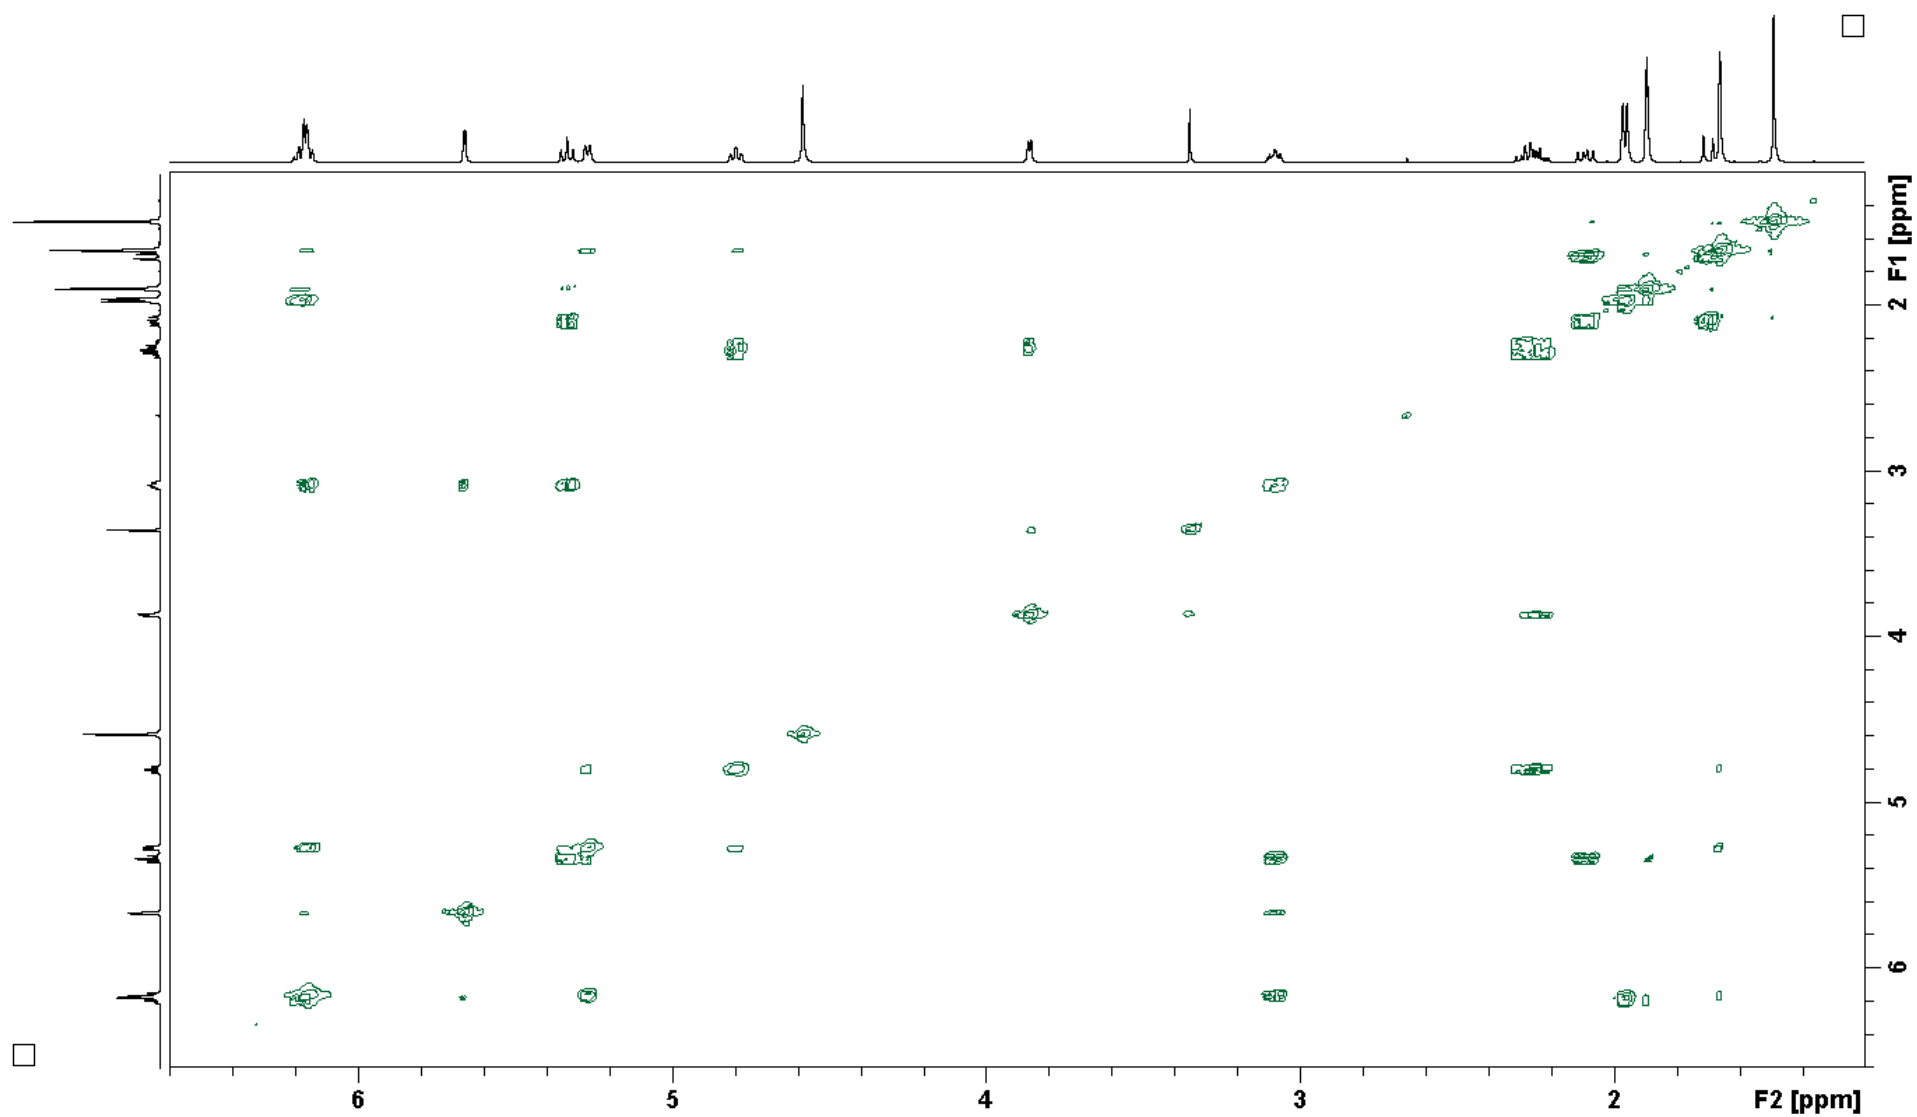

Figure S19:  $^1\text{H}$ - $^1\text{H}$  COSY spectrum of compound 5 in  $\text{CD}_3\text{OD}$ .

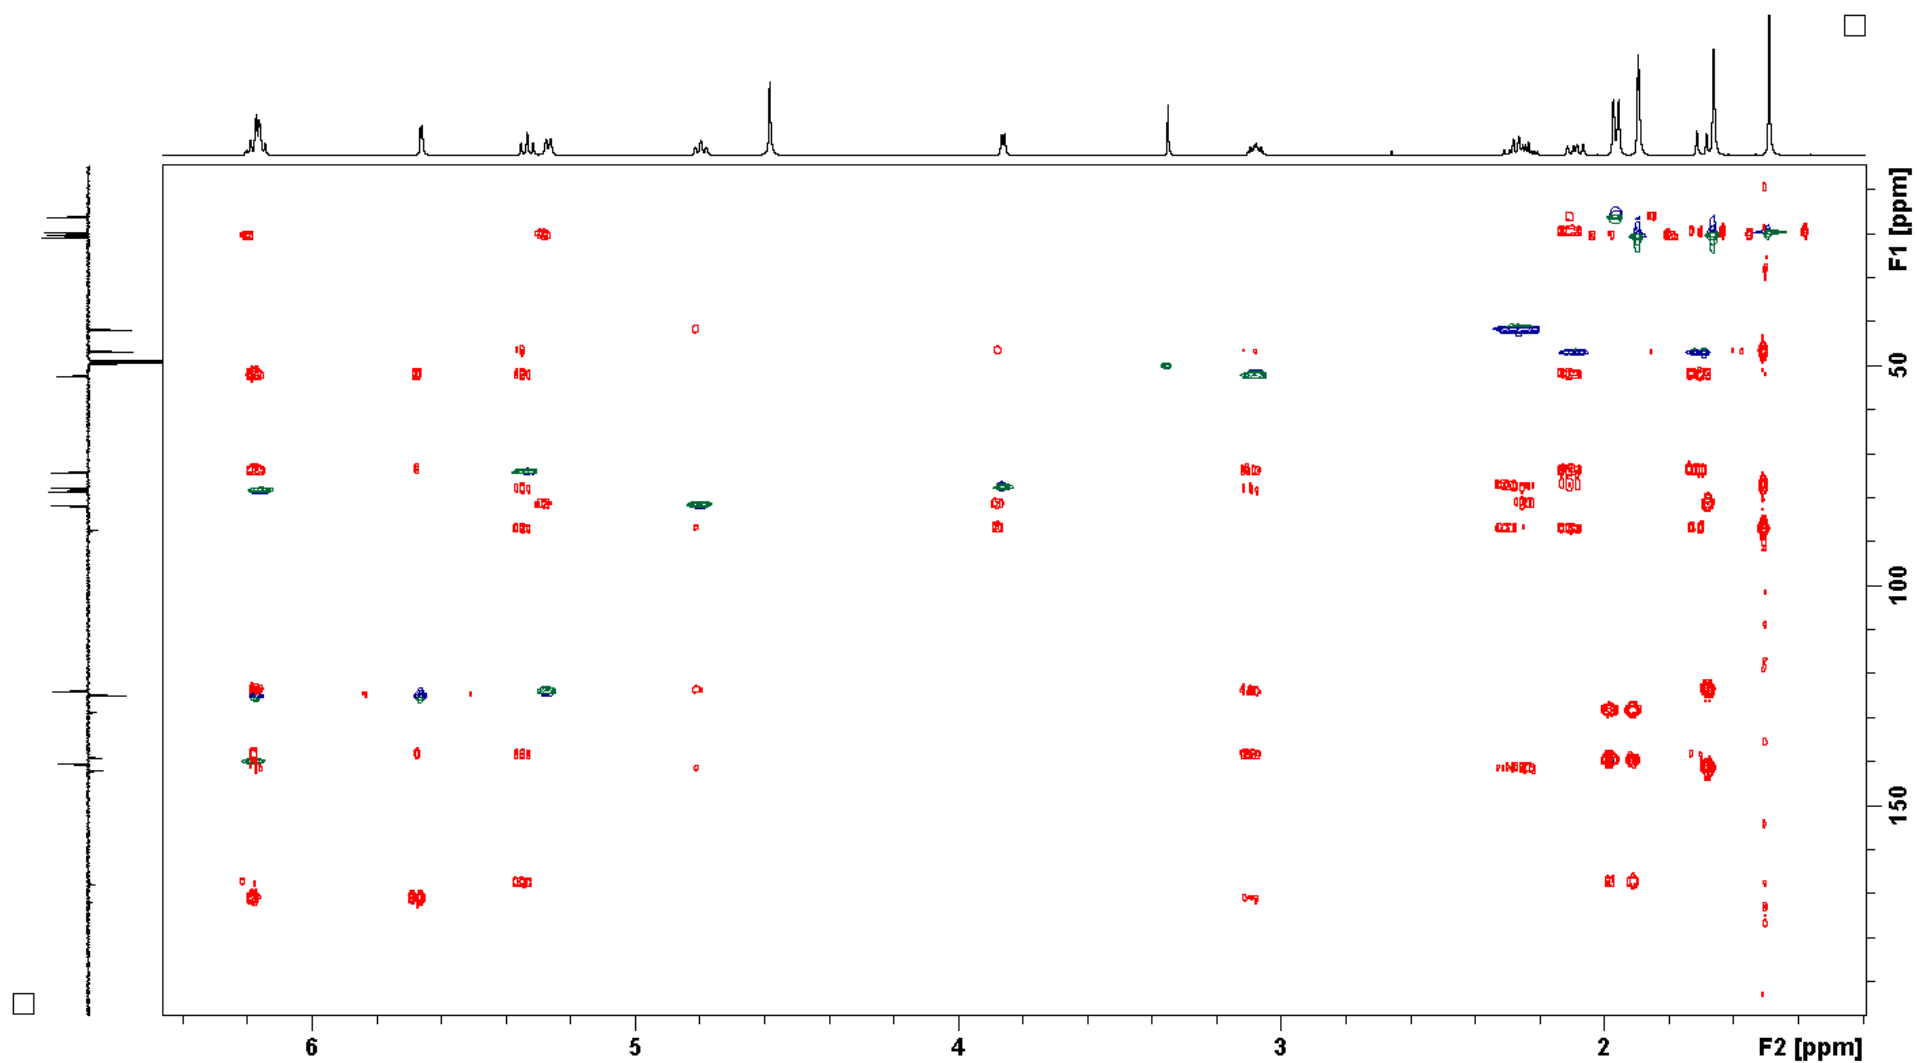

**Figure S20:** Overlay of HSQC and HMBC spectra of compound 5 in  $\text{CD}_3\text{OD}$ .

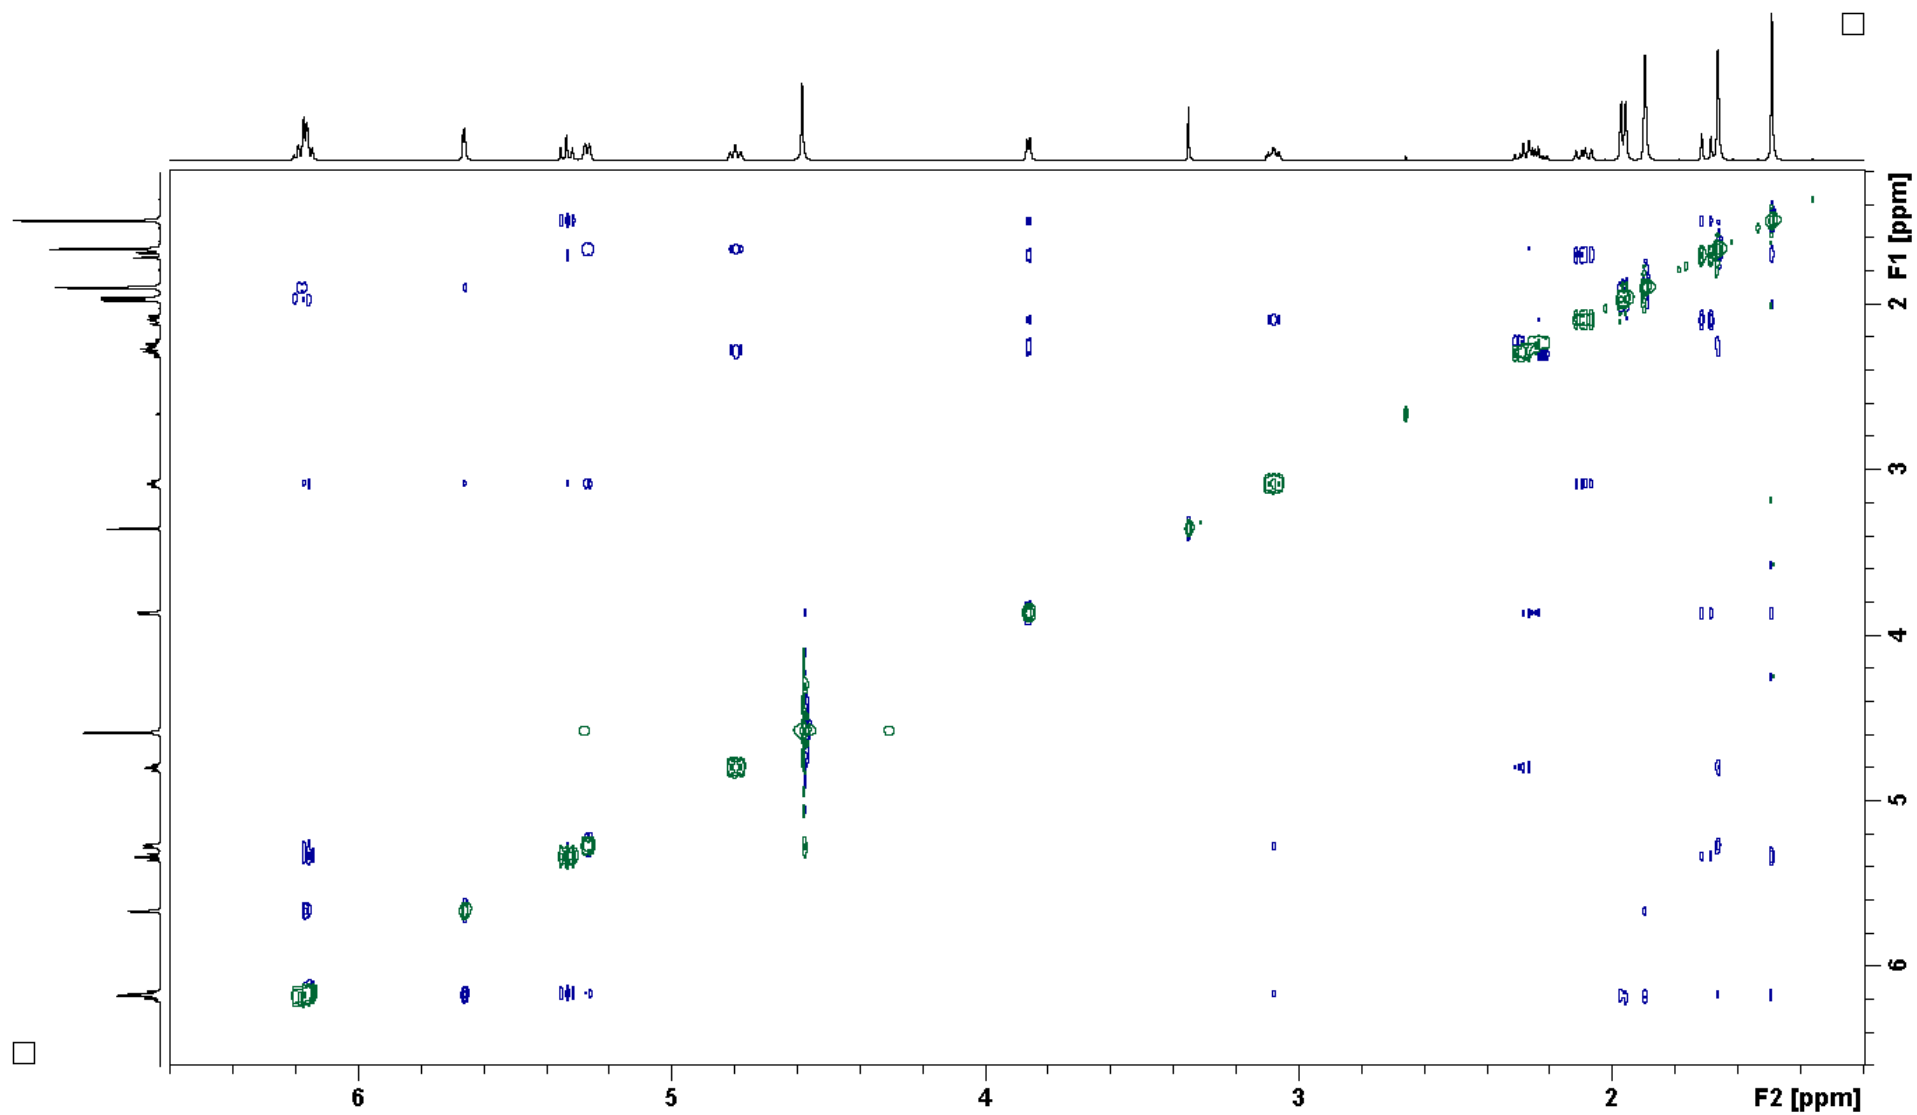

Figure S21: 2D  $^1\text{H}$ - $^1\text{H}$  NOESY spectrum of compound 5 in  $\text{CD}_3\text{OD}$ .

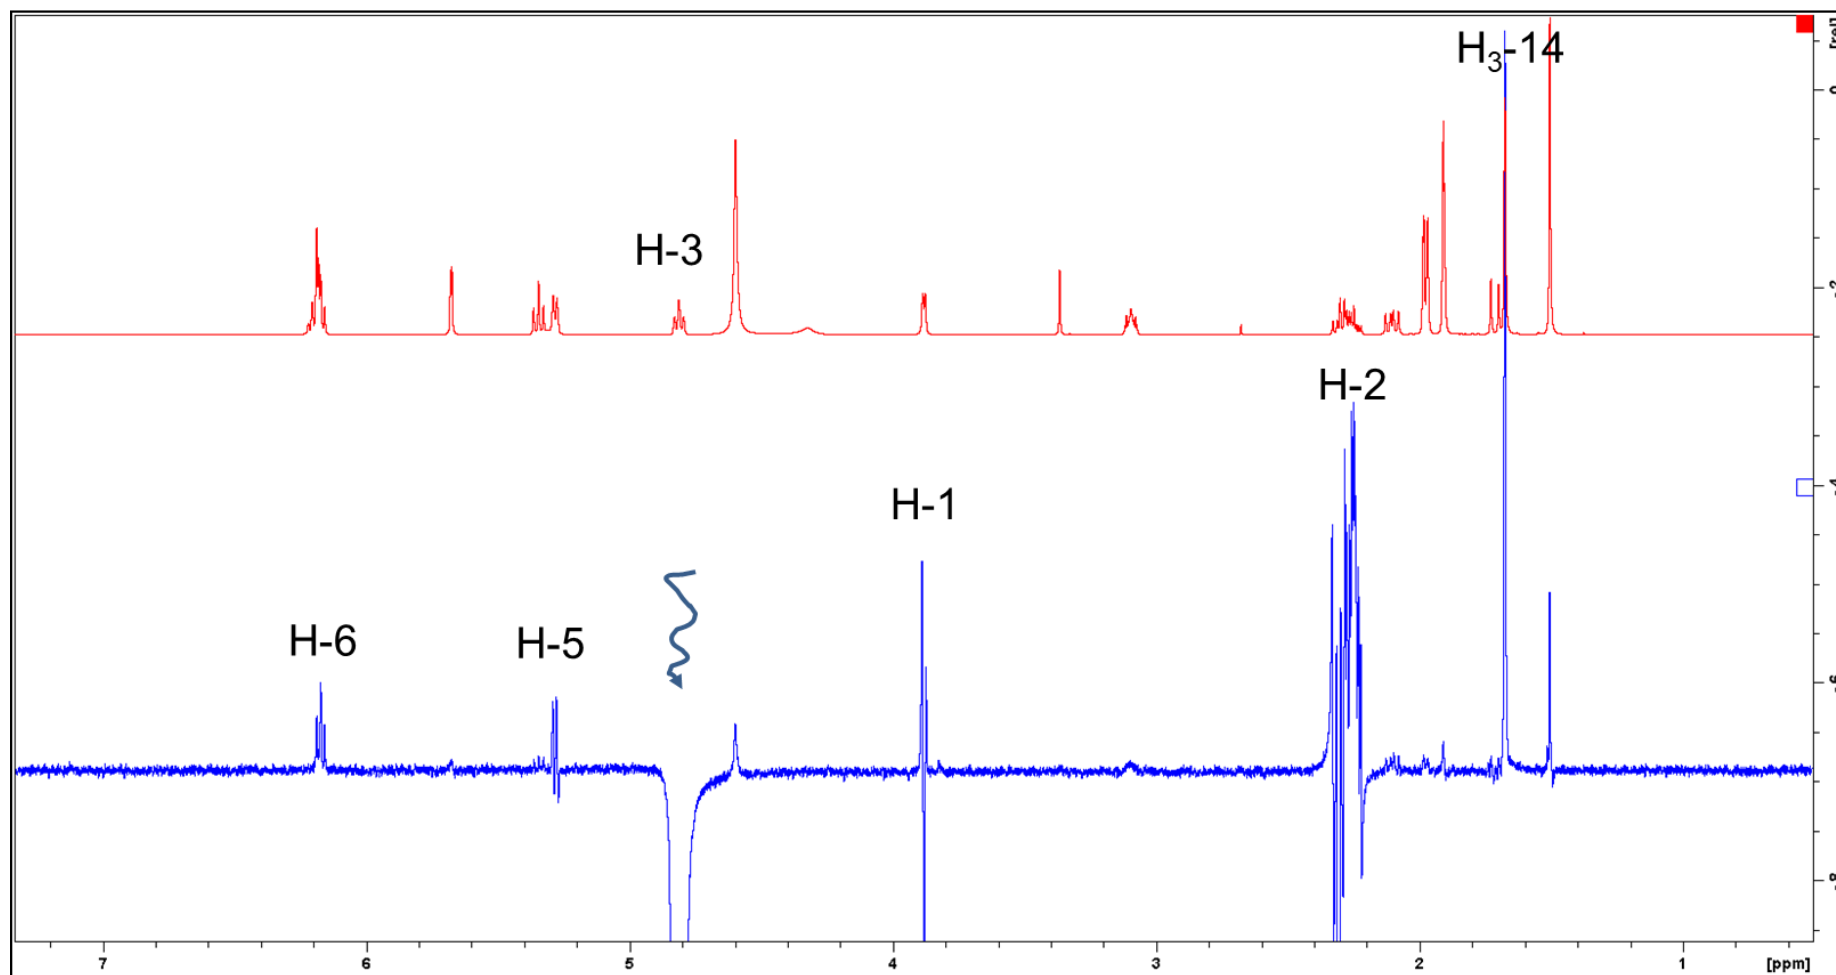

**Figure S22:** 1D Selective NOESY spectrum of compound **5** in CD<sub>3</sub>OD (D8 = 0.3 sec).

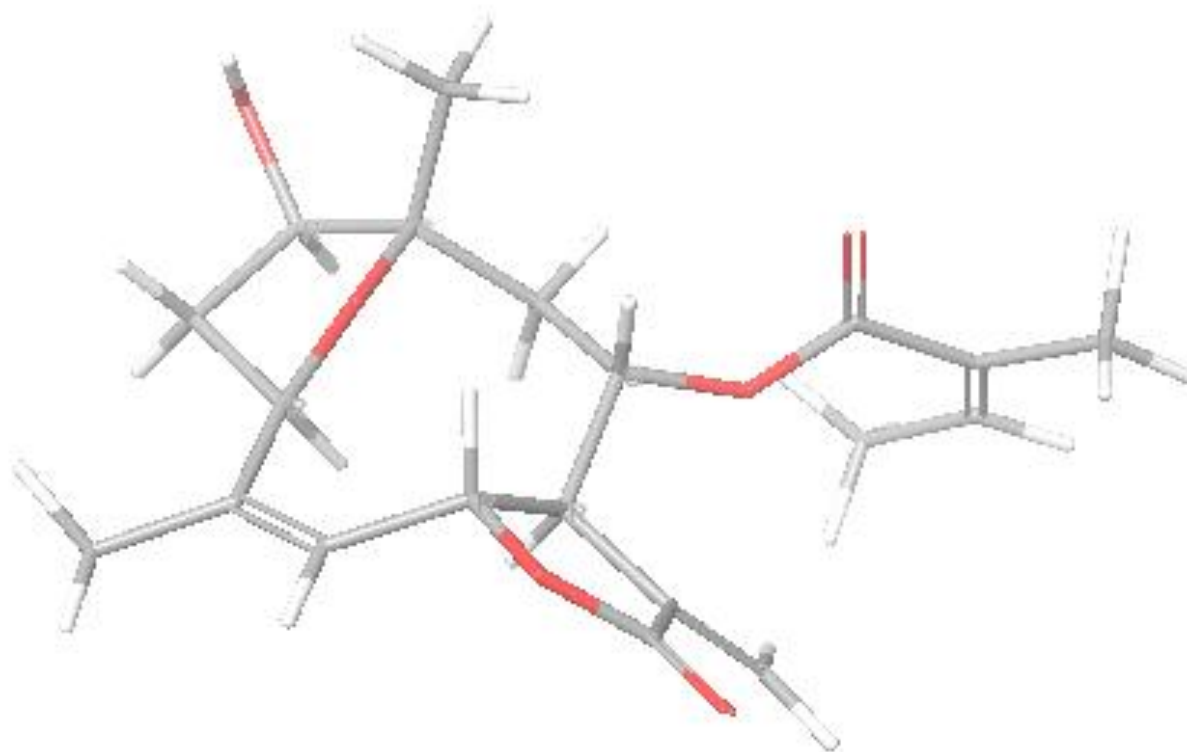

**Figure S23:** DFT 6-31+G(d,p) optimized structure of **5**.

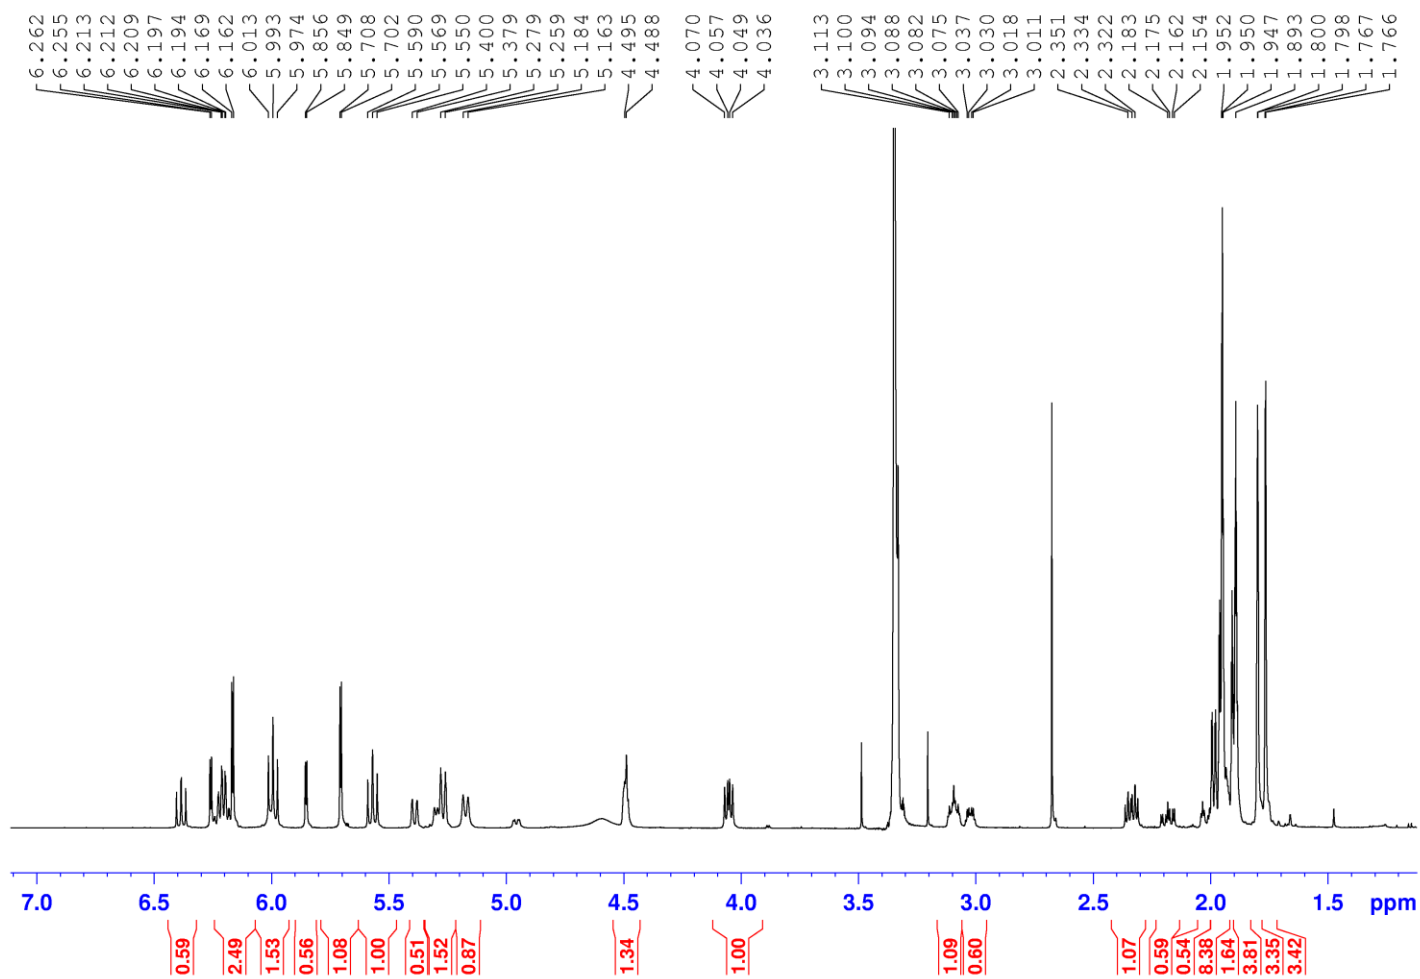

**Figure S24:** <sup>1</sup>H-NMR spectrum of compounds 6-7 in CD<sub>3</sub>OD.

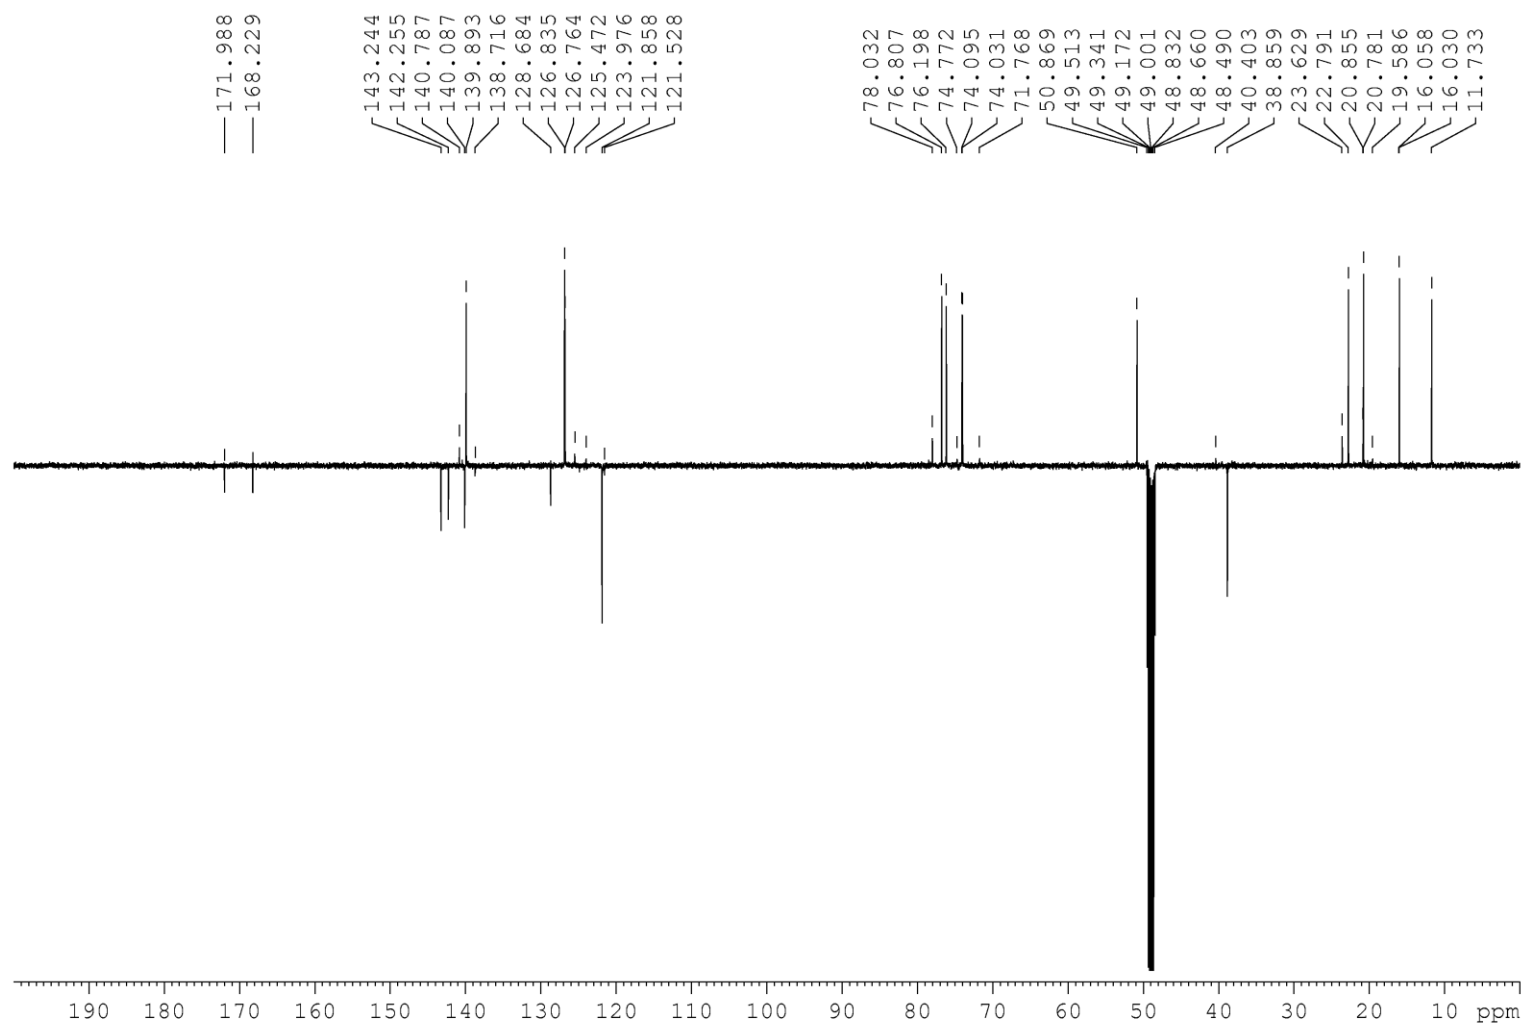

**Figure S25:**  $^{13}\text{C}$  spectrum of compounds 6-7 in  $\text{CD}_3\text{OD}$ .

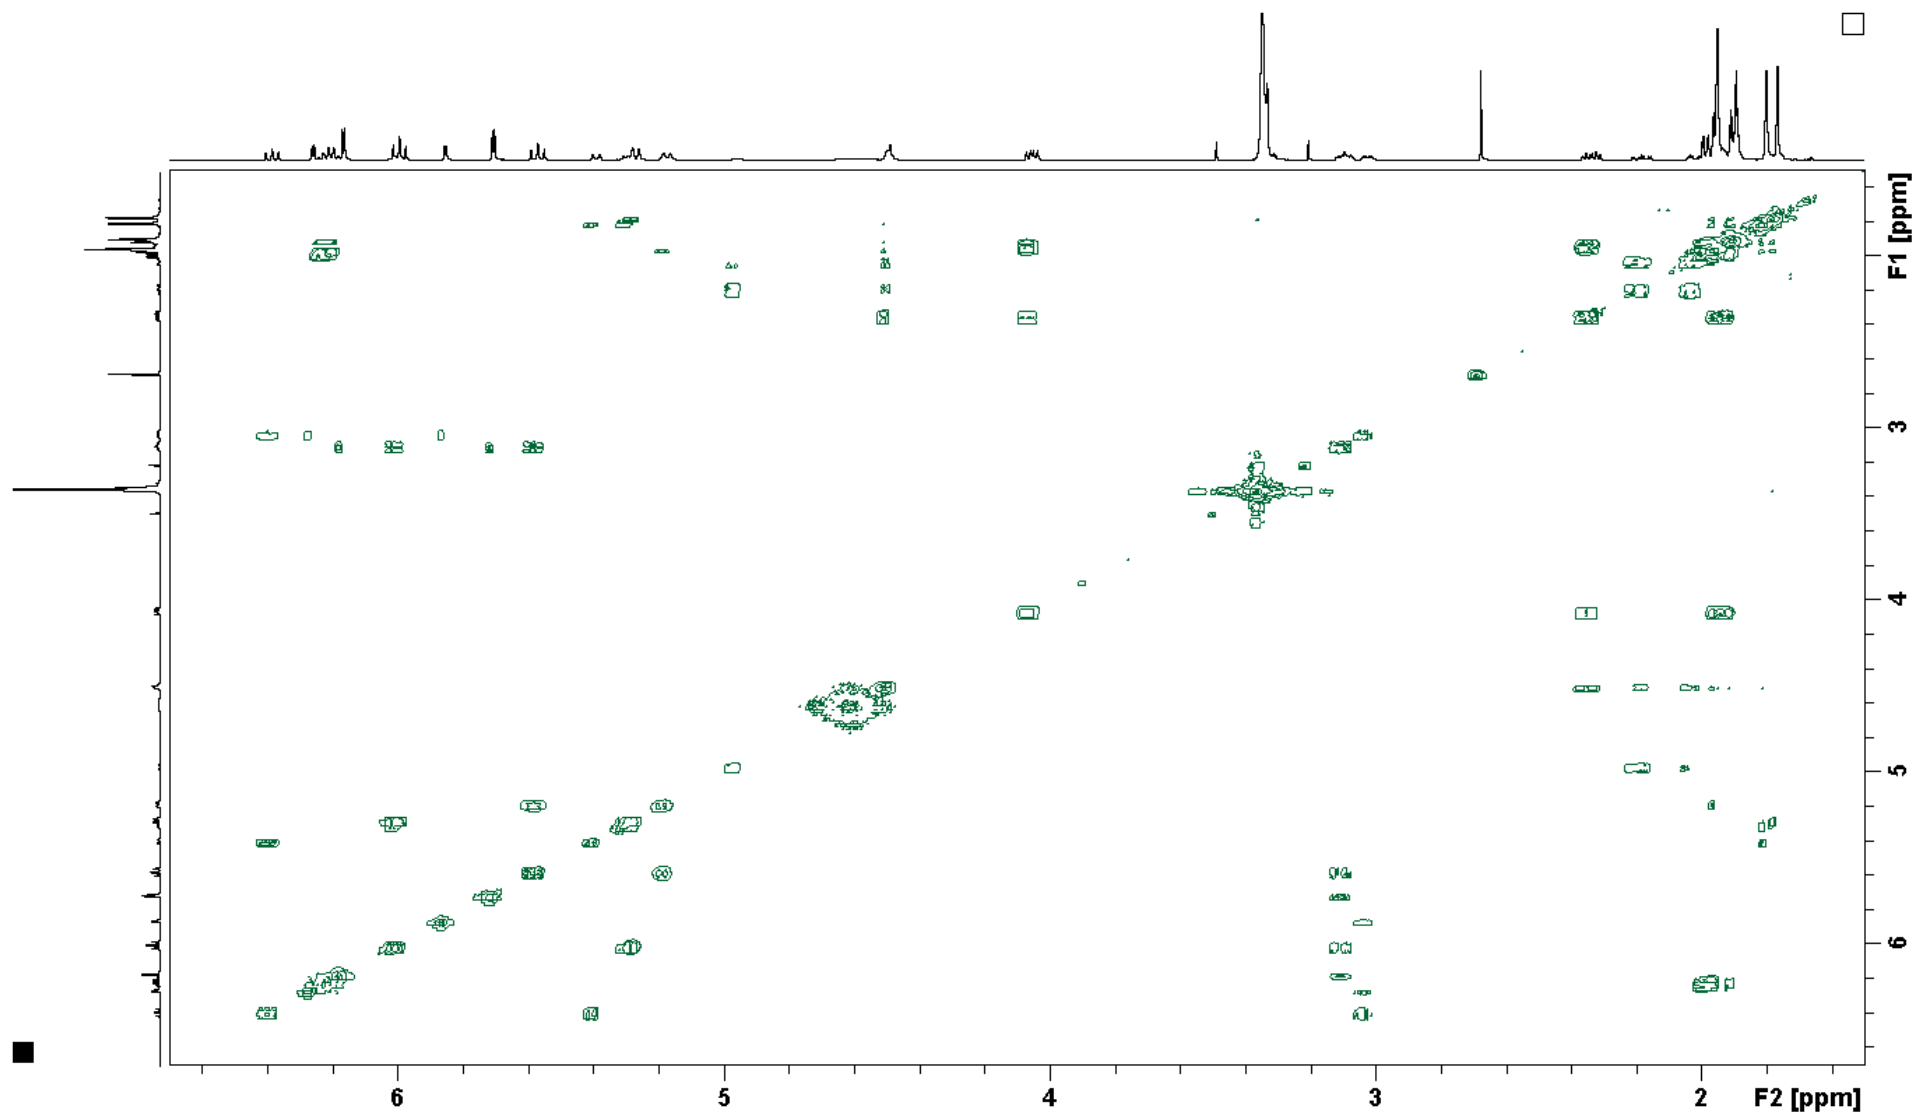

Figure S26:  $^1\text{H}$ - $^1\text{H}$  COSY spectrum of compounds 6-7 in  $\text{CD}_3\text{OD}$ .

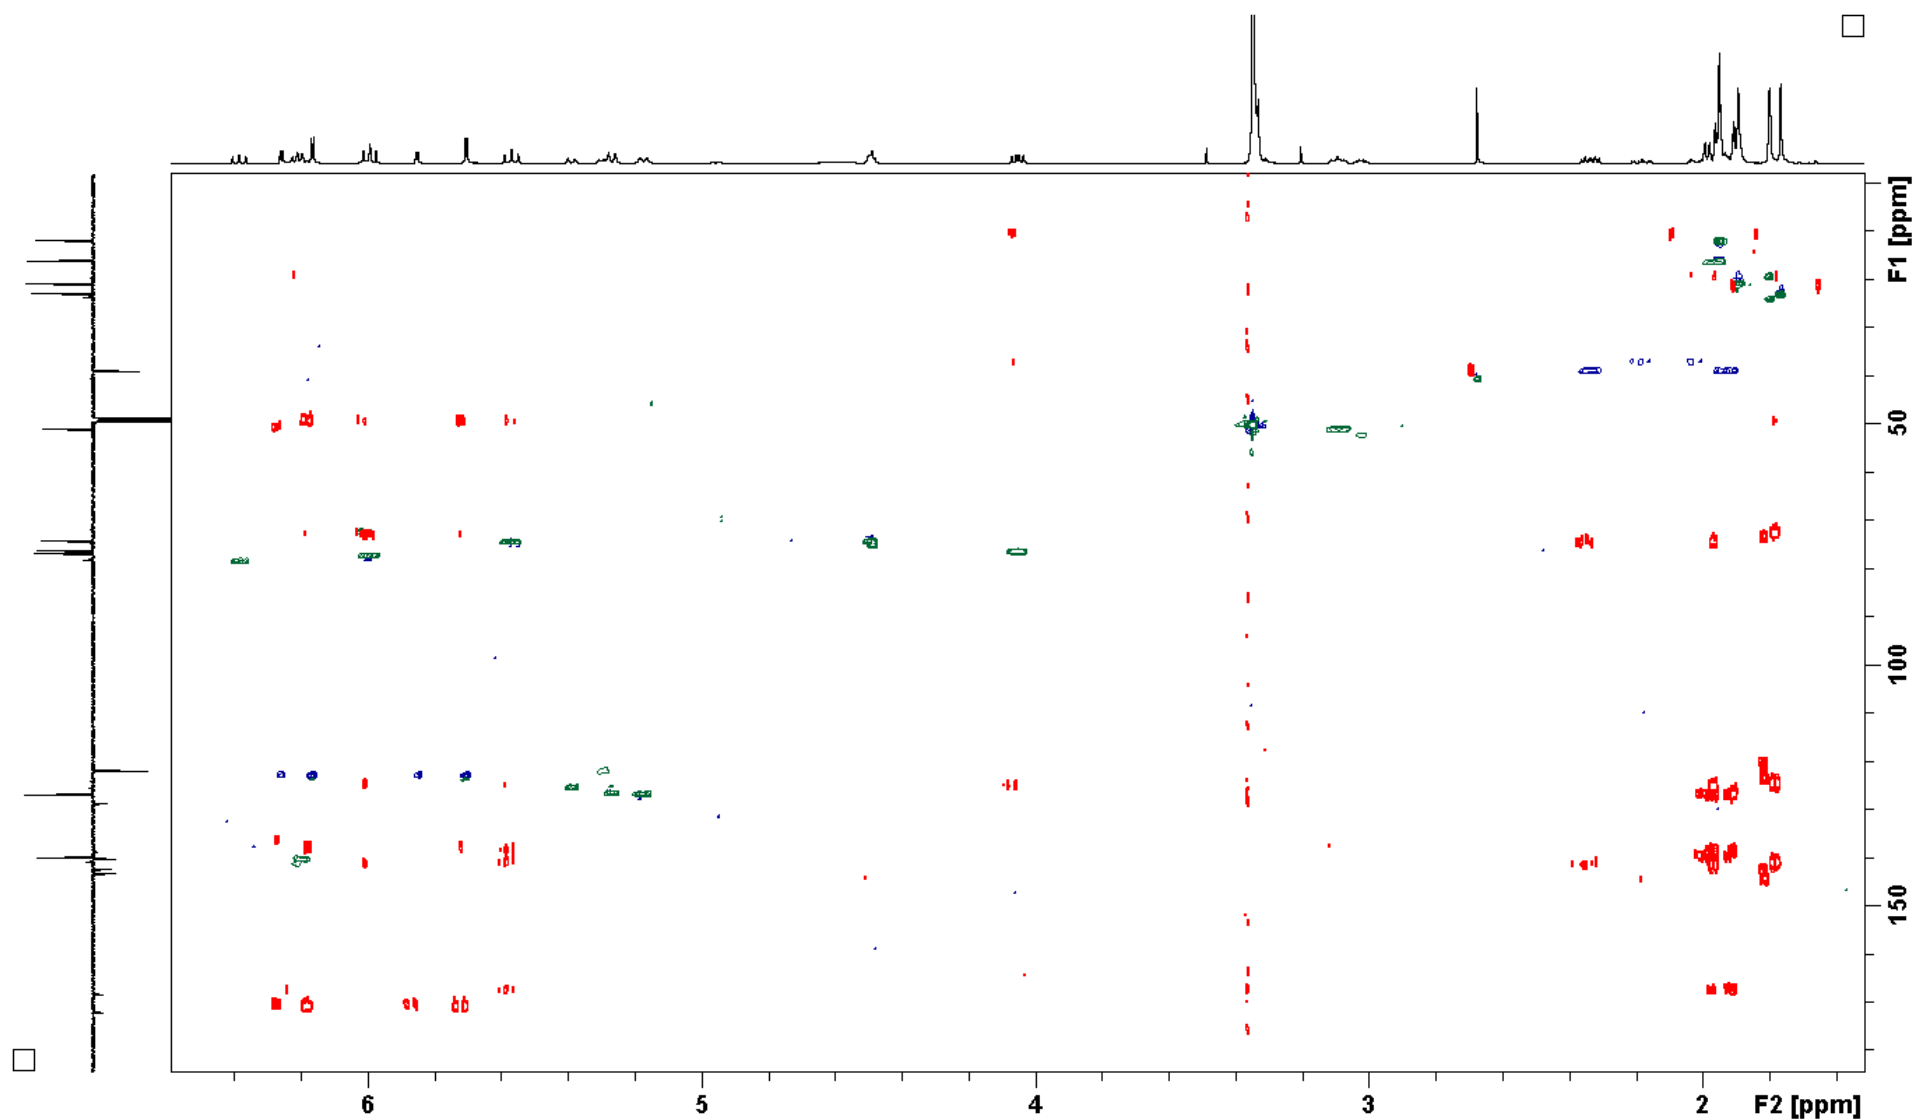

**Figure S27:** Overlay of HSQC and HMBC spectra of compounds **6-7** in CD<sub>3</sub>OD.

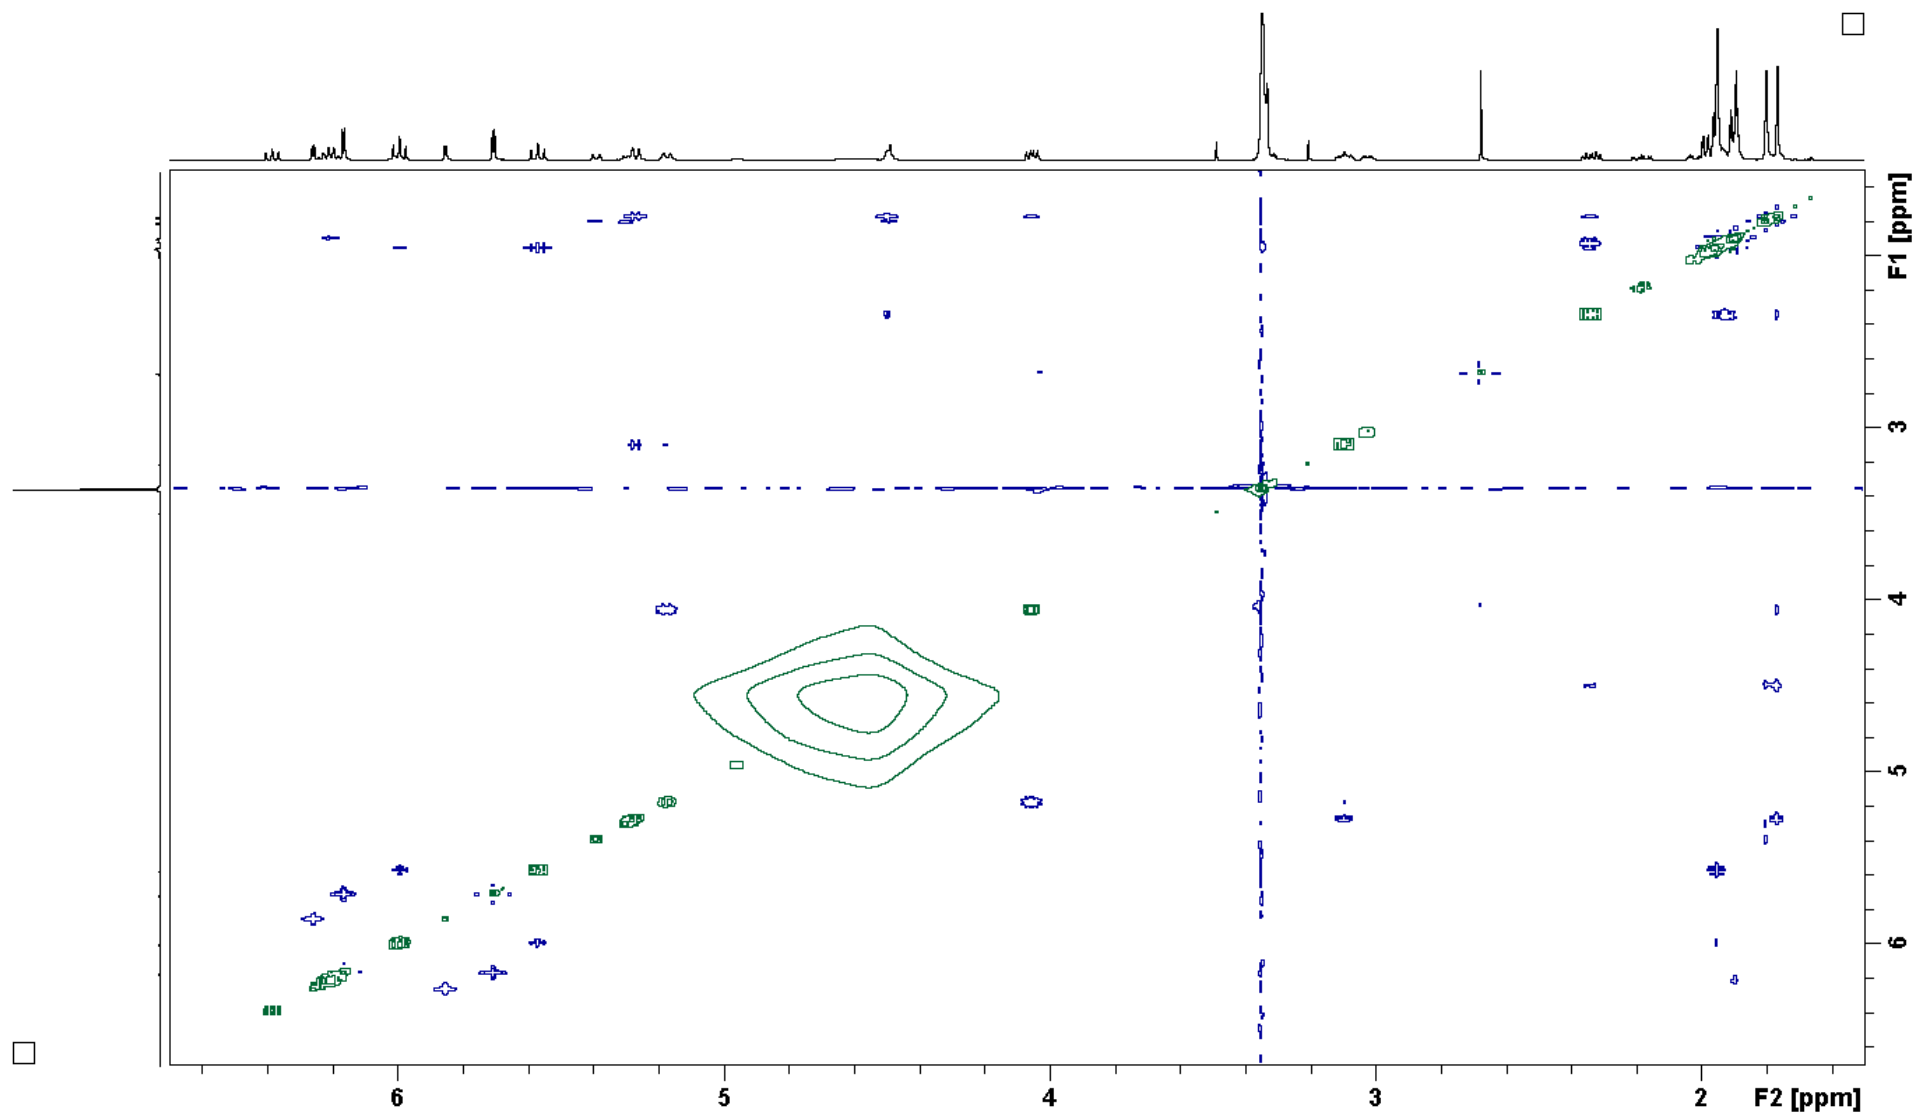

Figure S28: 2D  $^1\text{H}$ - $^1\text{H}$  NOESY spectrum of compounds 6-7 in  $\text{CD}_3\text{OD}$ .

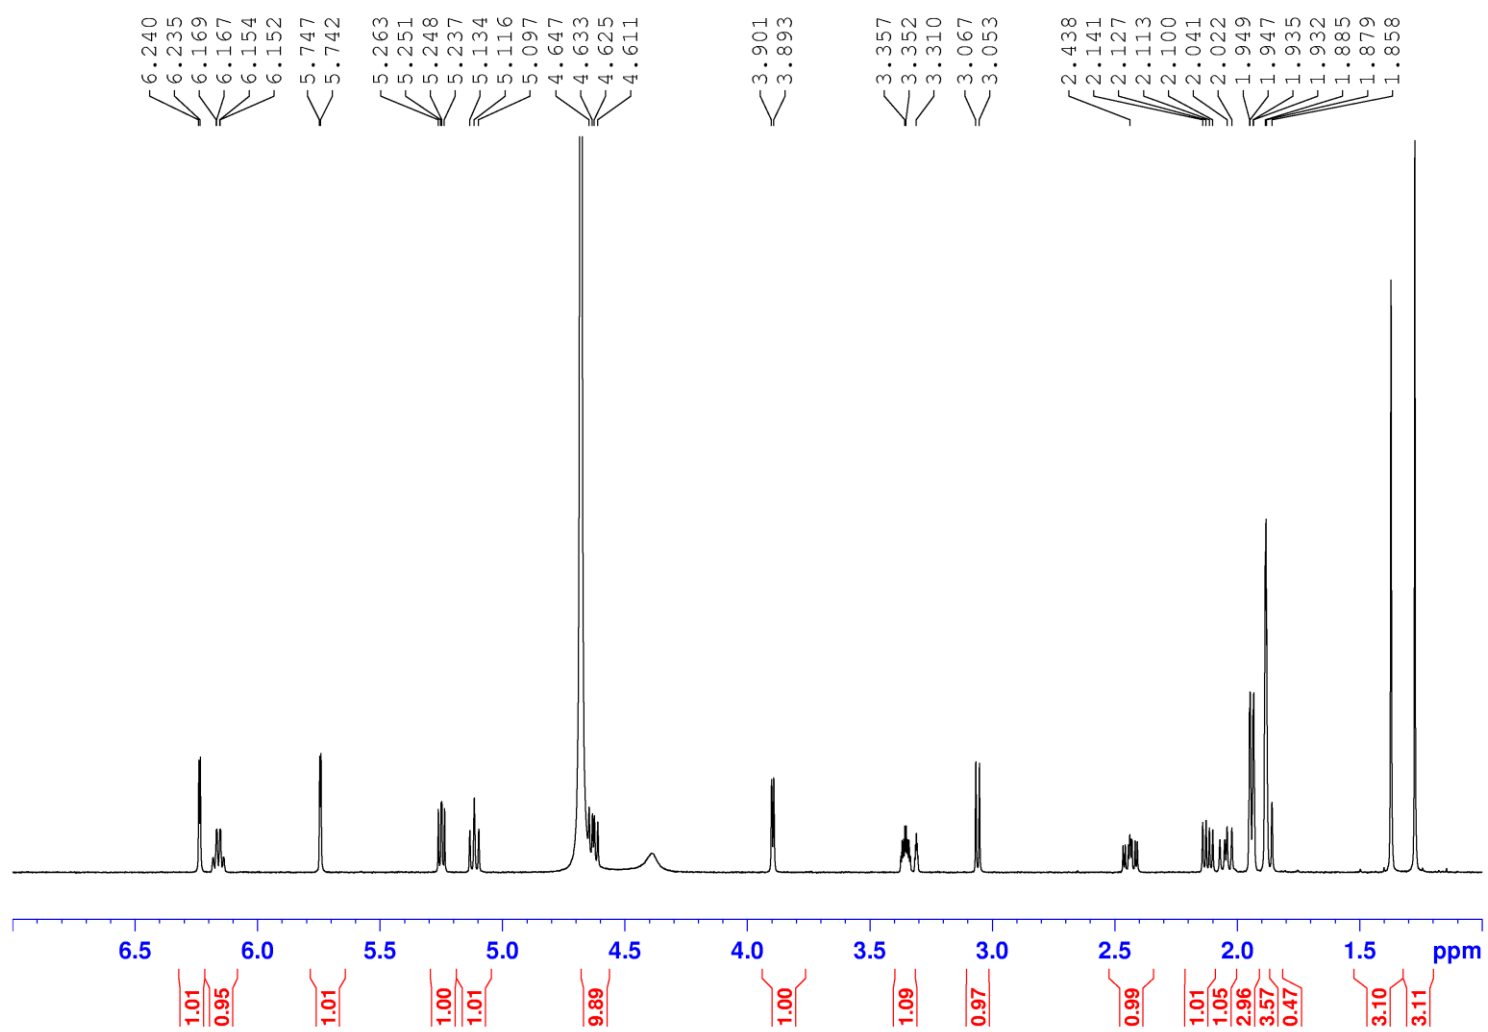

**Figure S29:** <sup>1</sup>H-NMR spectrum of compound 8 in CD<sub>3</sub>OD.

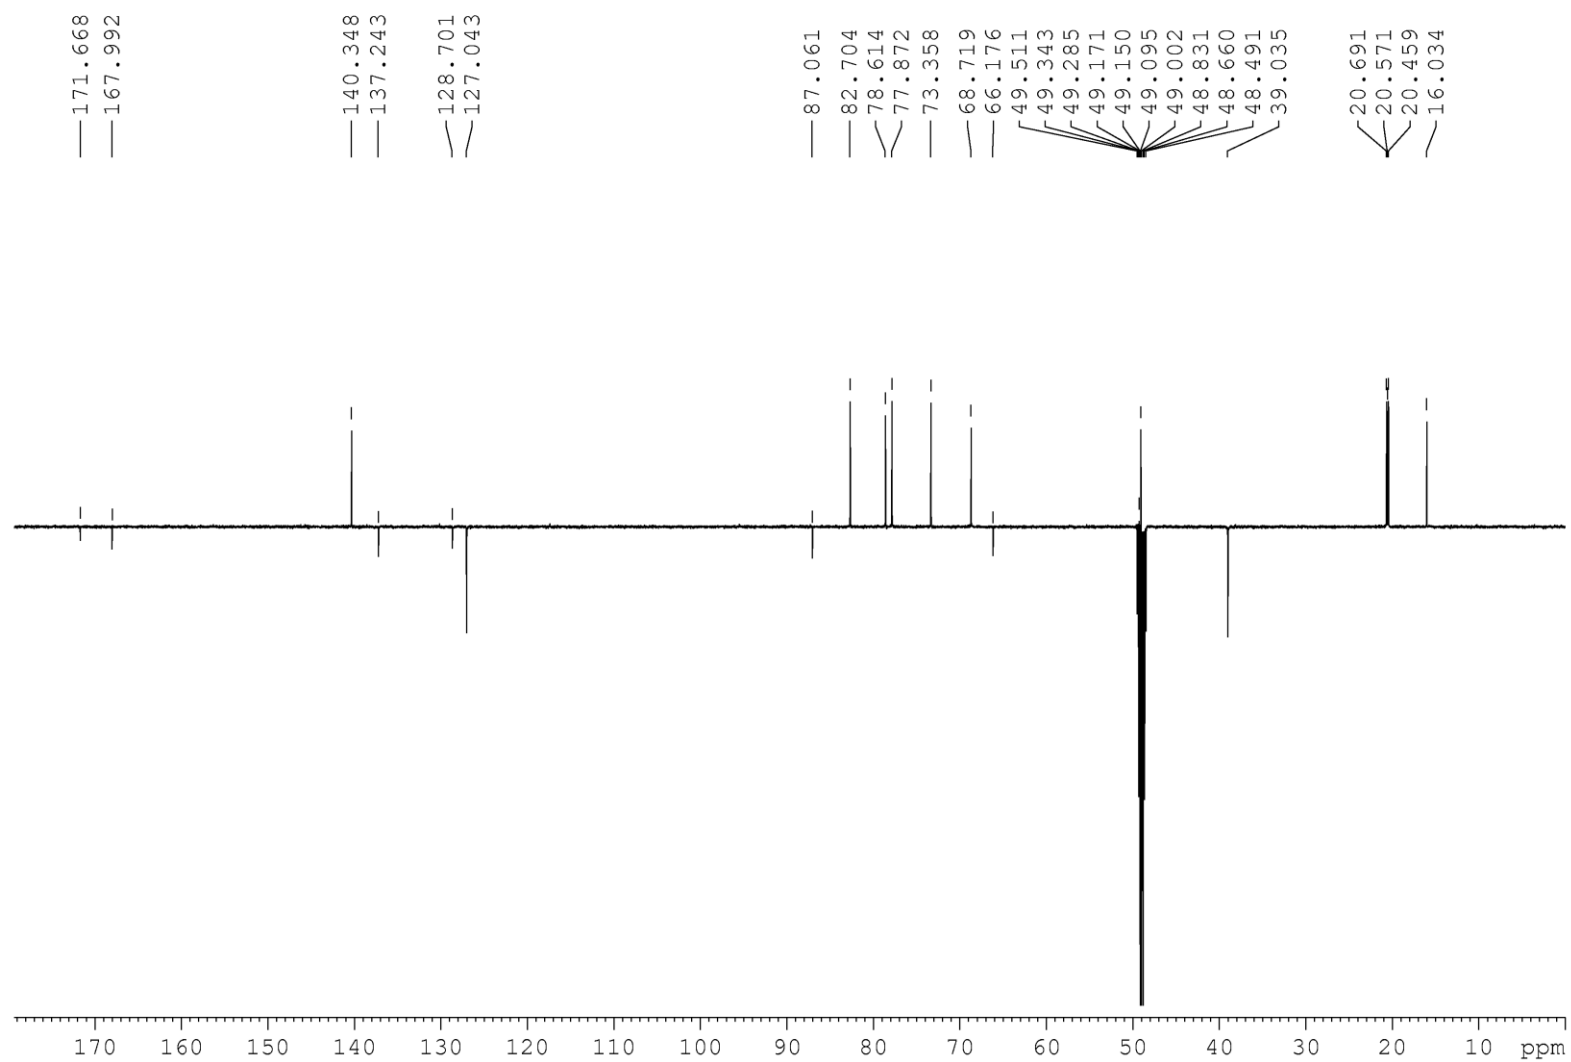

**Figure S30:** <sup>13</sup>C spectrum of compound 8 in CD<sub>3</sub>OD.

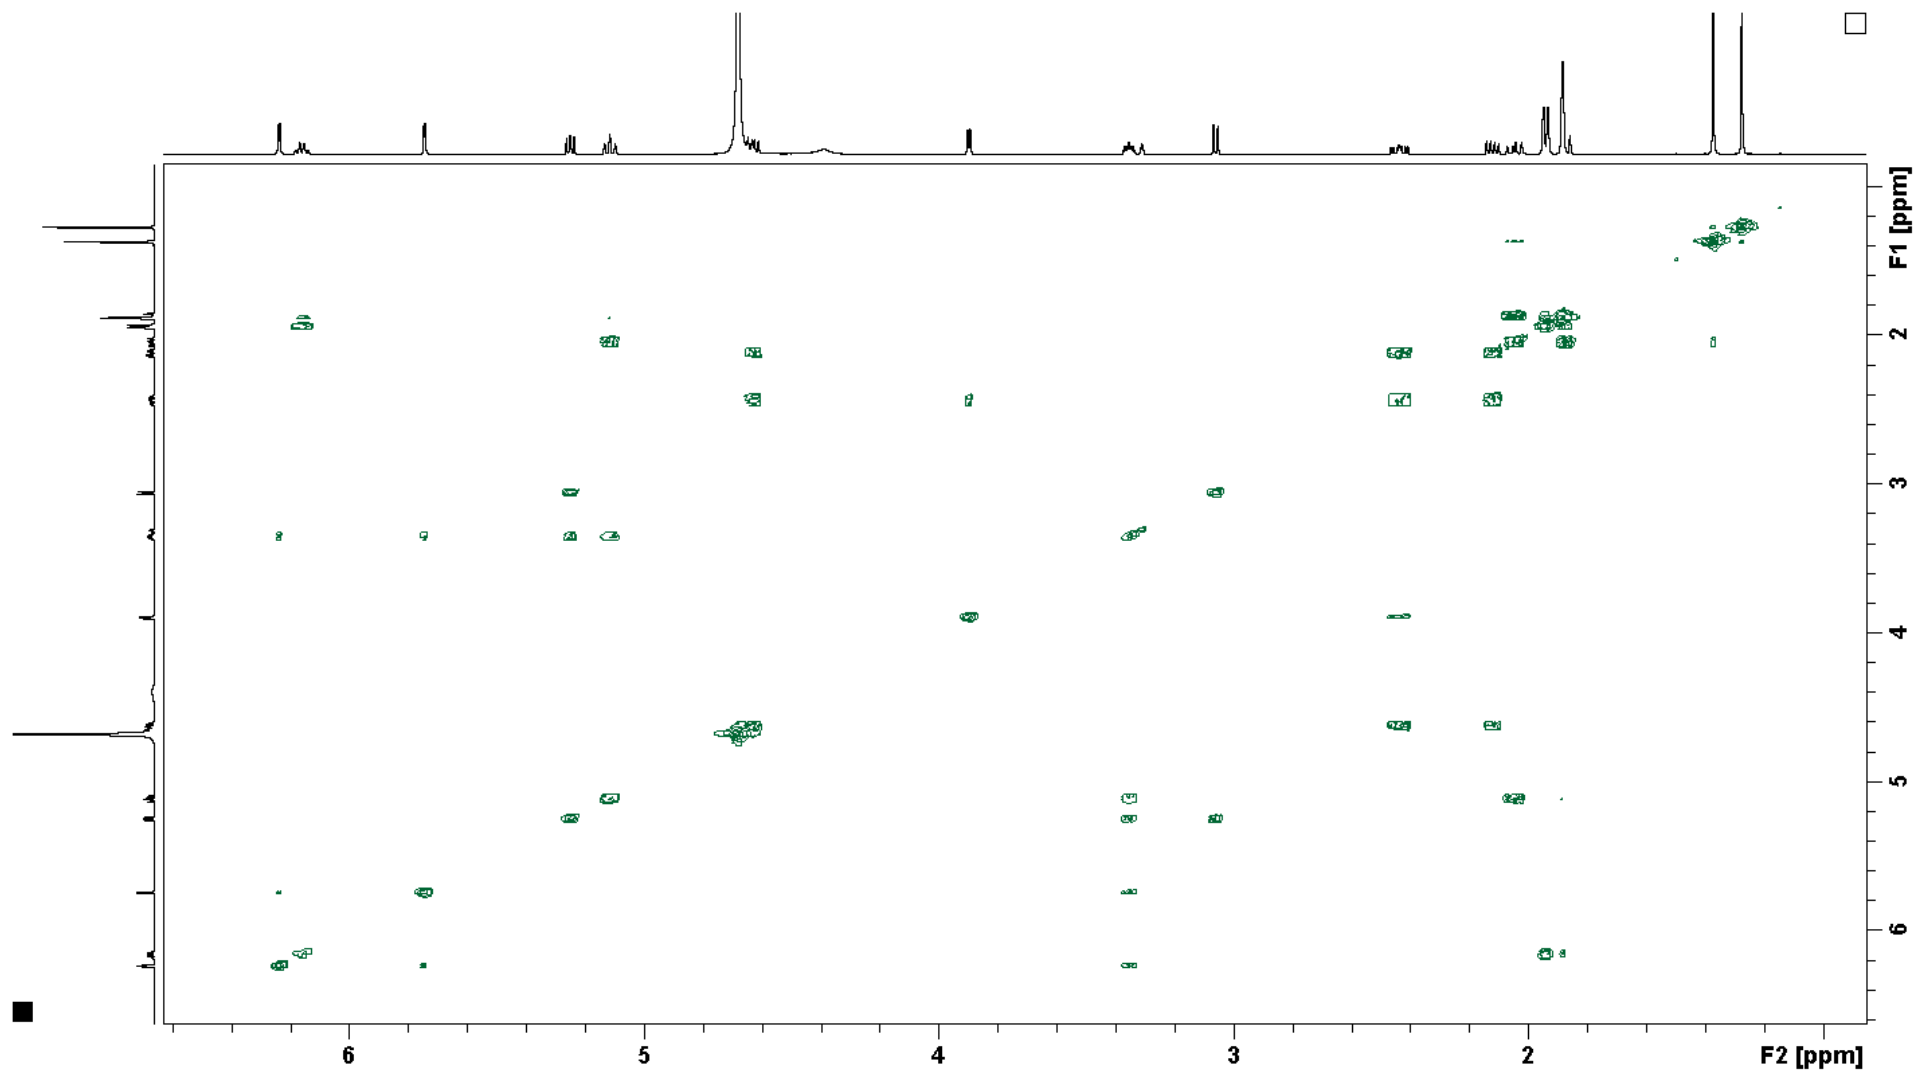

Figure S31:  $^1\text{H}$ - $^1\text{H}$  COSY spectrum of compound **8** in  $\text{CD}_3\text{OD}$ .

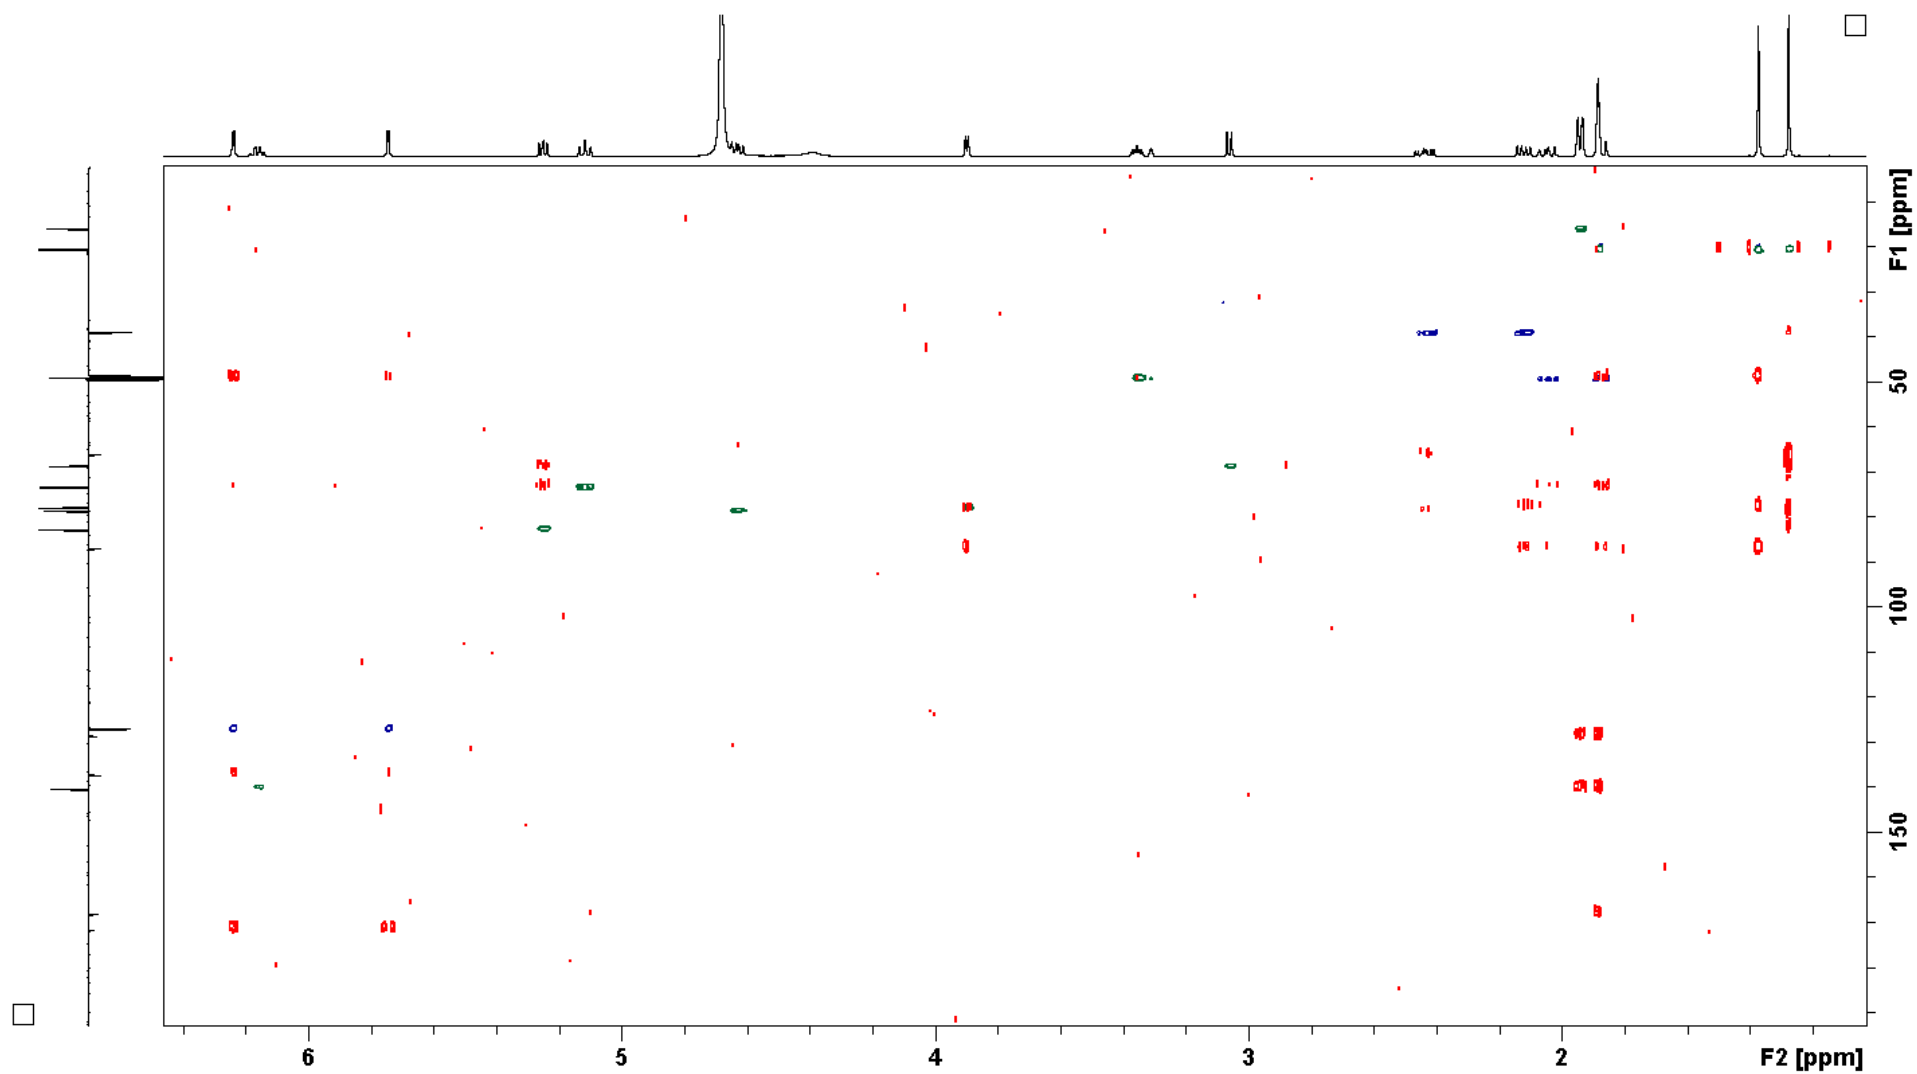

**Figure S32:** Overlay of HSQC and HMBC spectra of compound **8** in CD<sub>3</sub>OD.

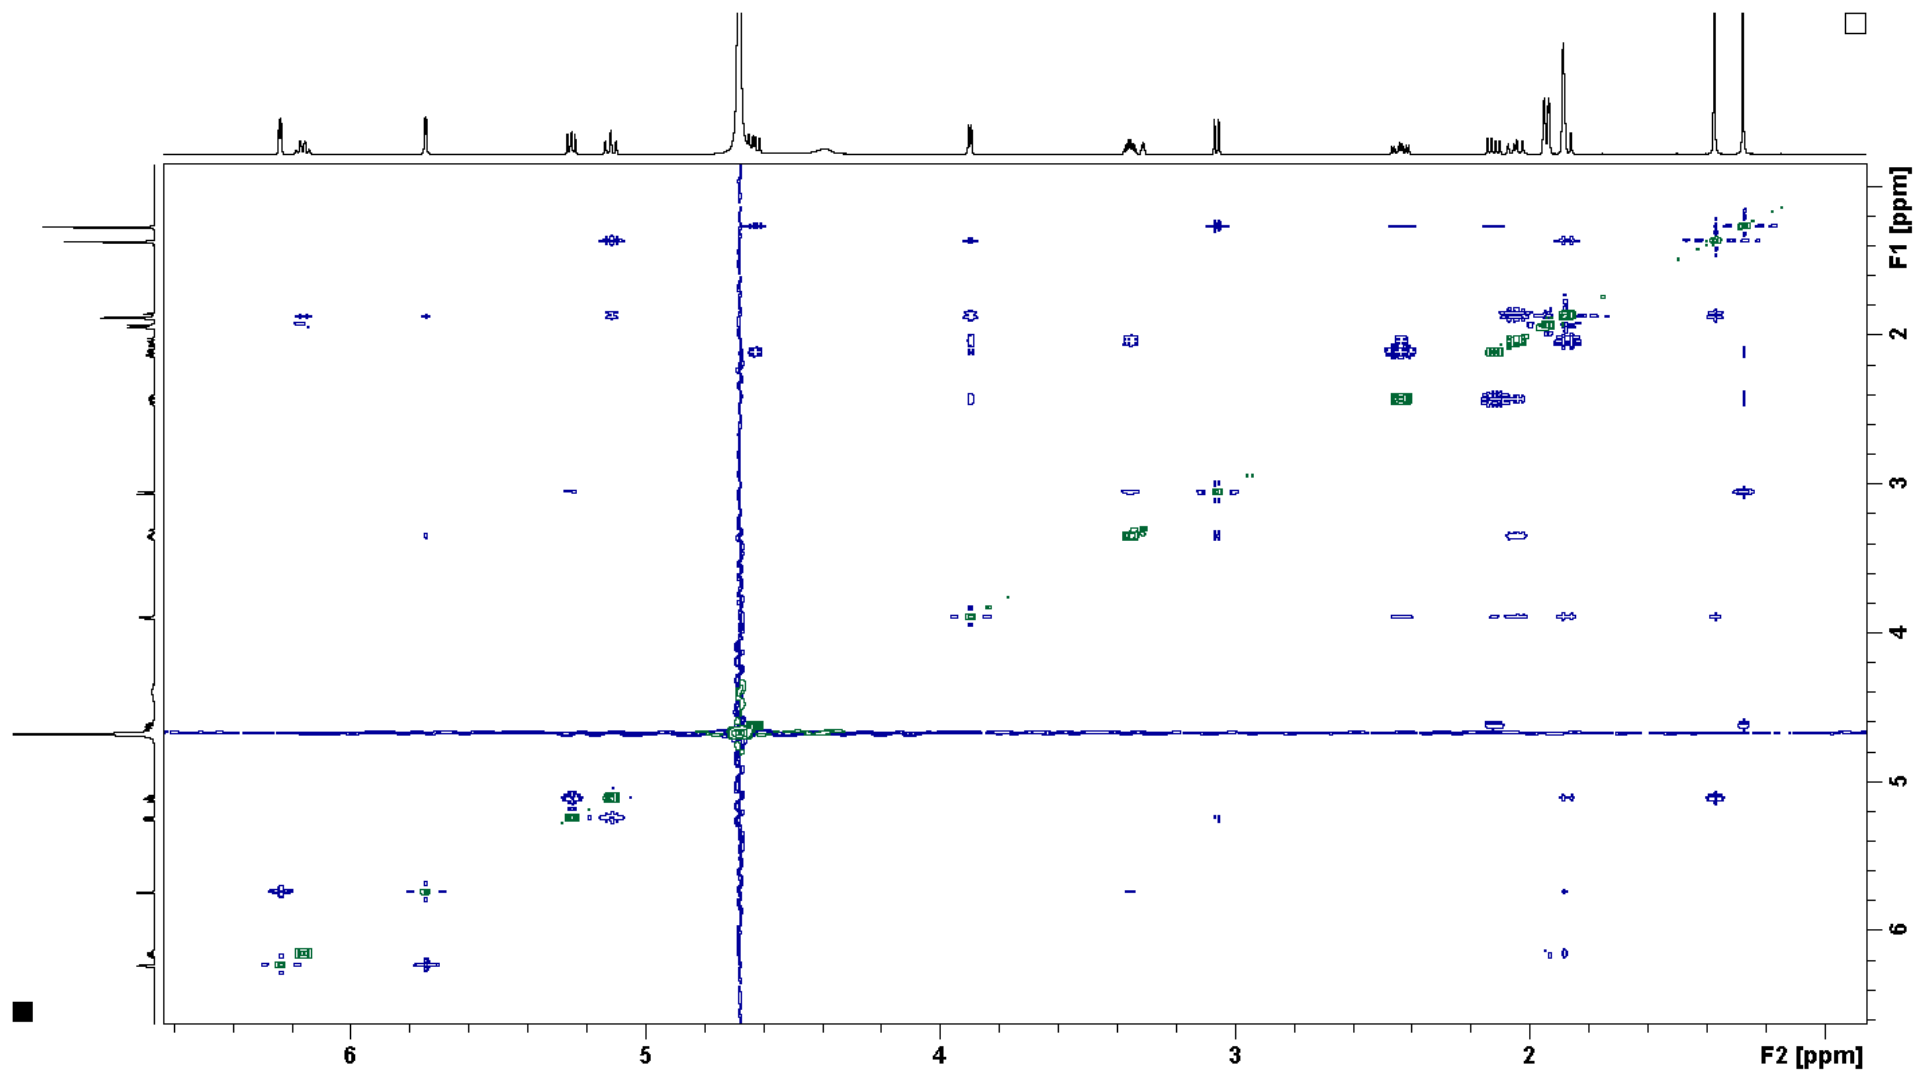

Figure S33: 2D  $^1\text{H}$ - $^1\text{H}$  NOESY spectrum of compound 8 in  $\text{CD}_3\text{OD}$ .

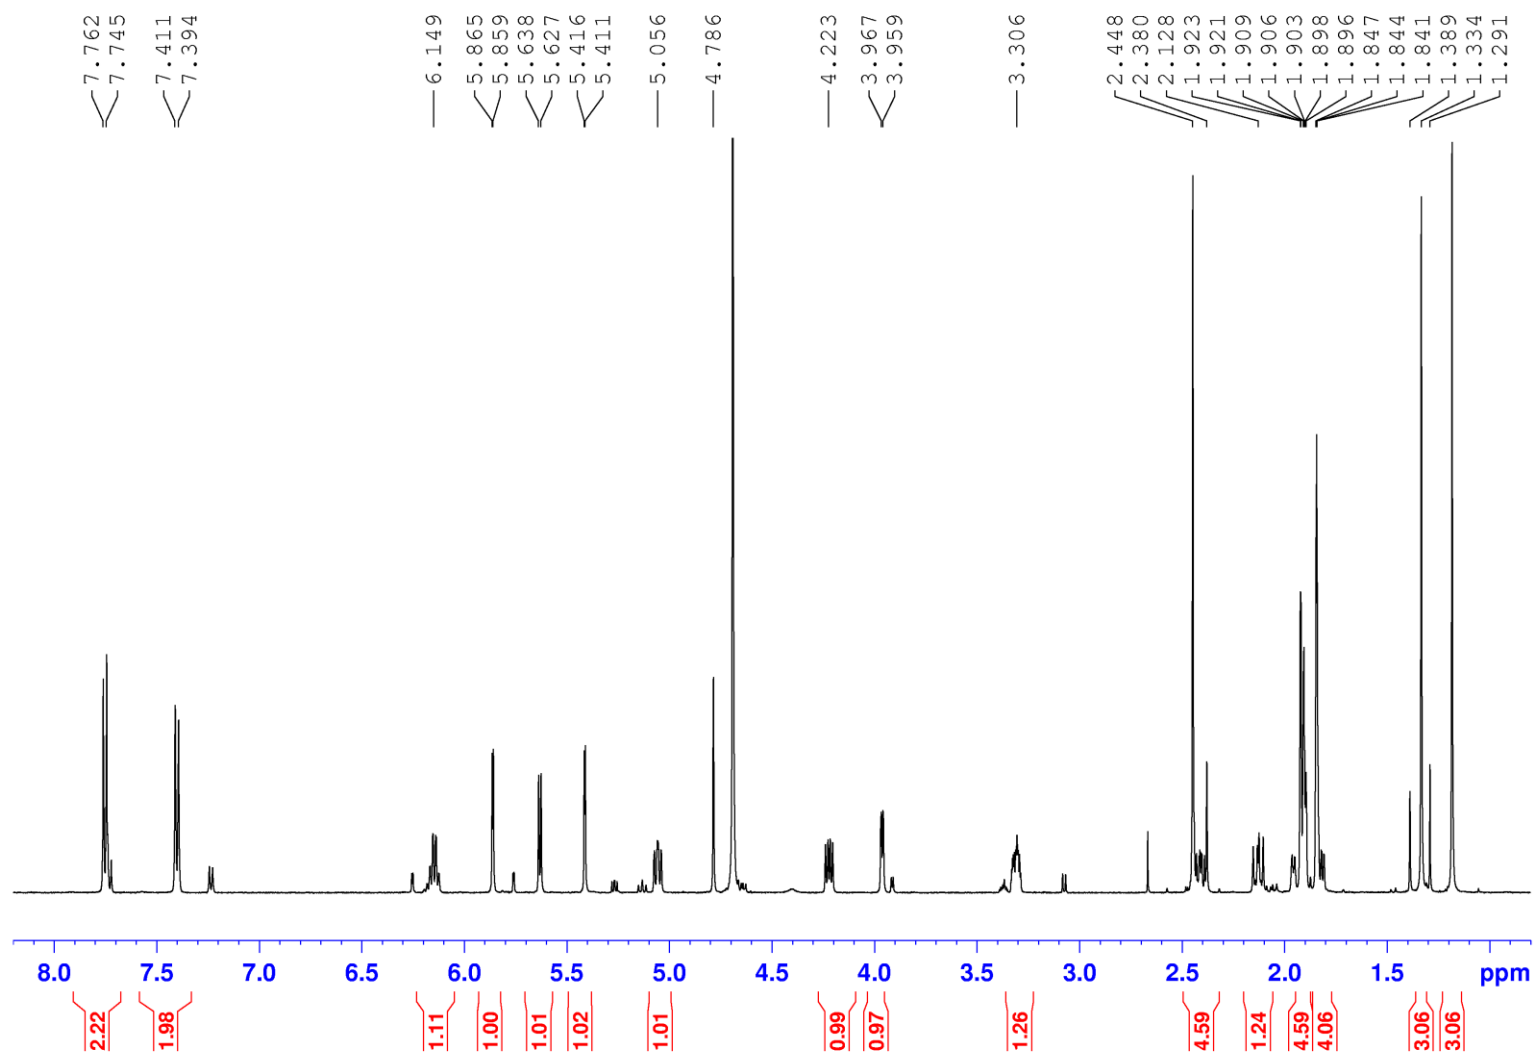

**Figure S34:** <sup>1</sup>H-NMR spectrum of compound **9** in CD<sub>3</sub>OD.

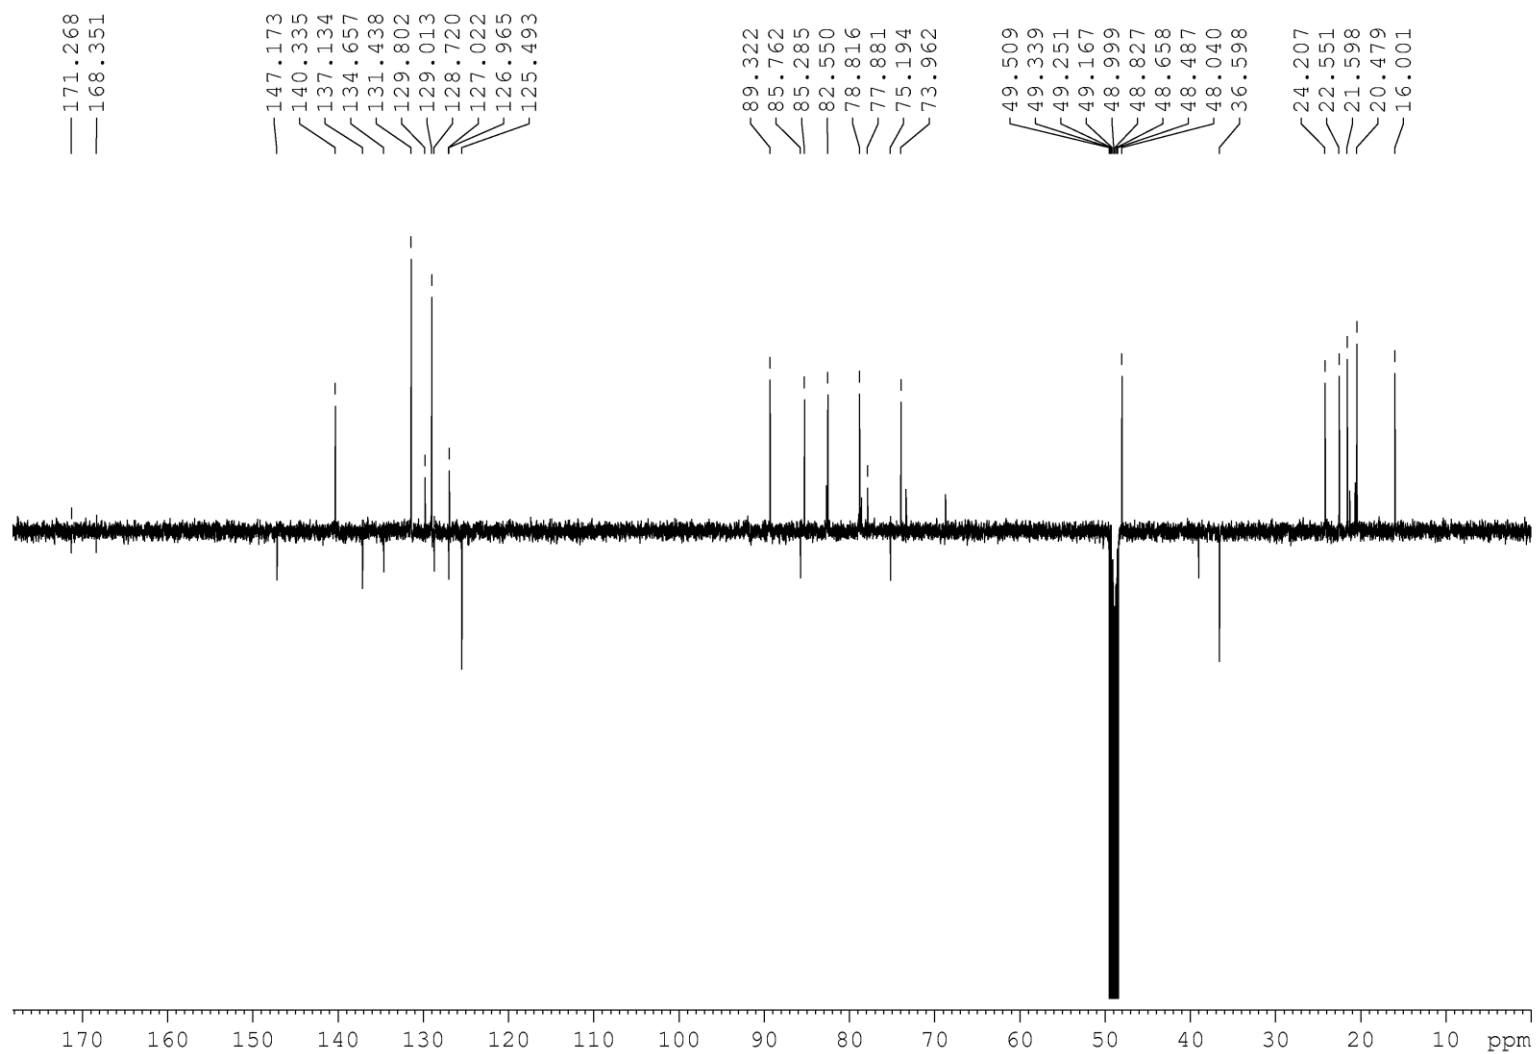

**Figure S35:** <sup>13</sup>C spectrum of compound 9 in CD<sub>3</sub>OD.

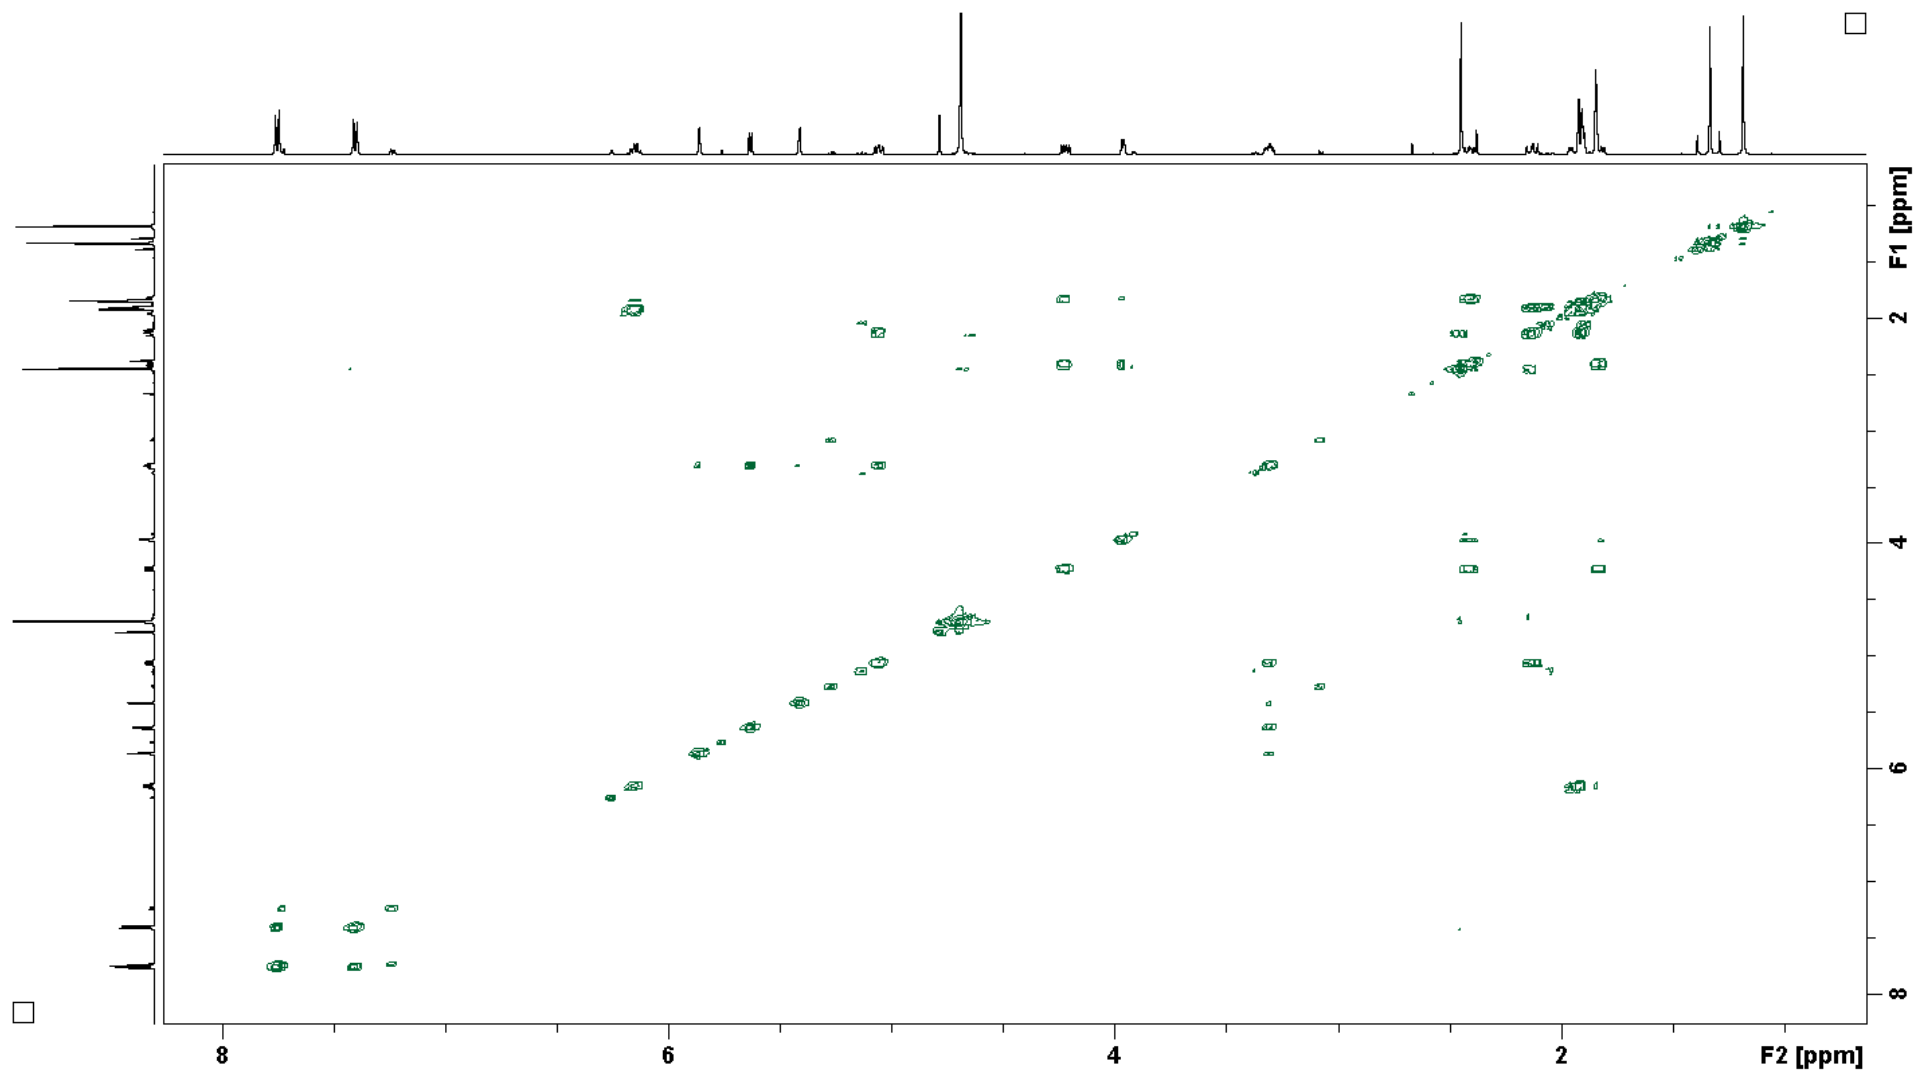

Figure S36:  $^1\text{H}$ - $^1\text{H}$  COSY spectrum of compound 9 in  $\text{CD}_3\text{OD}$ .

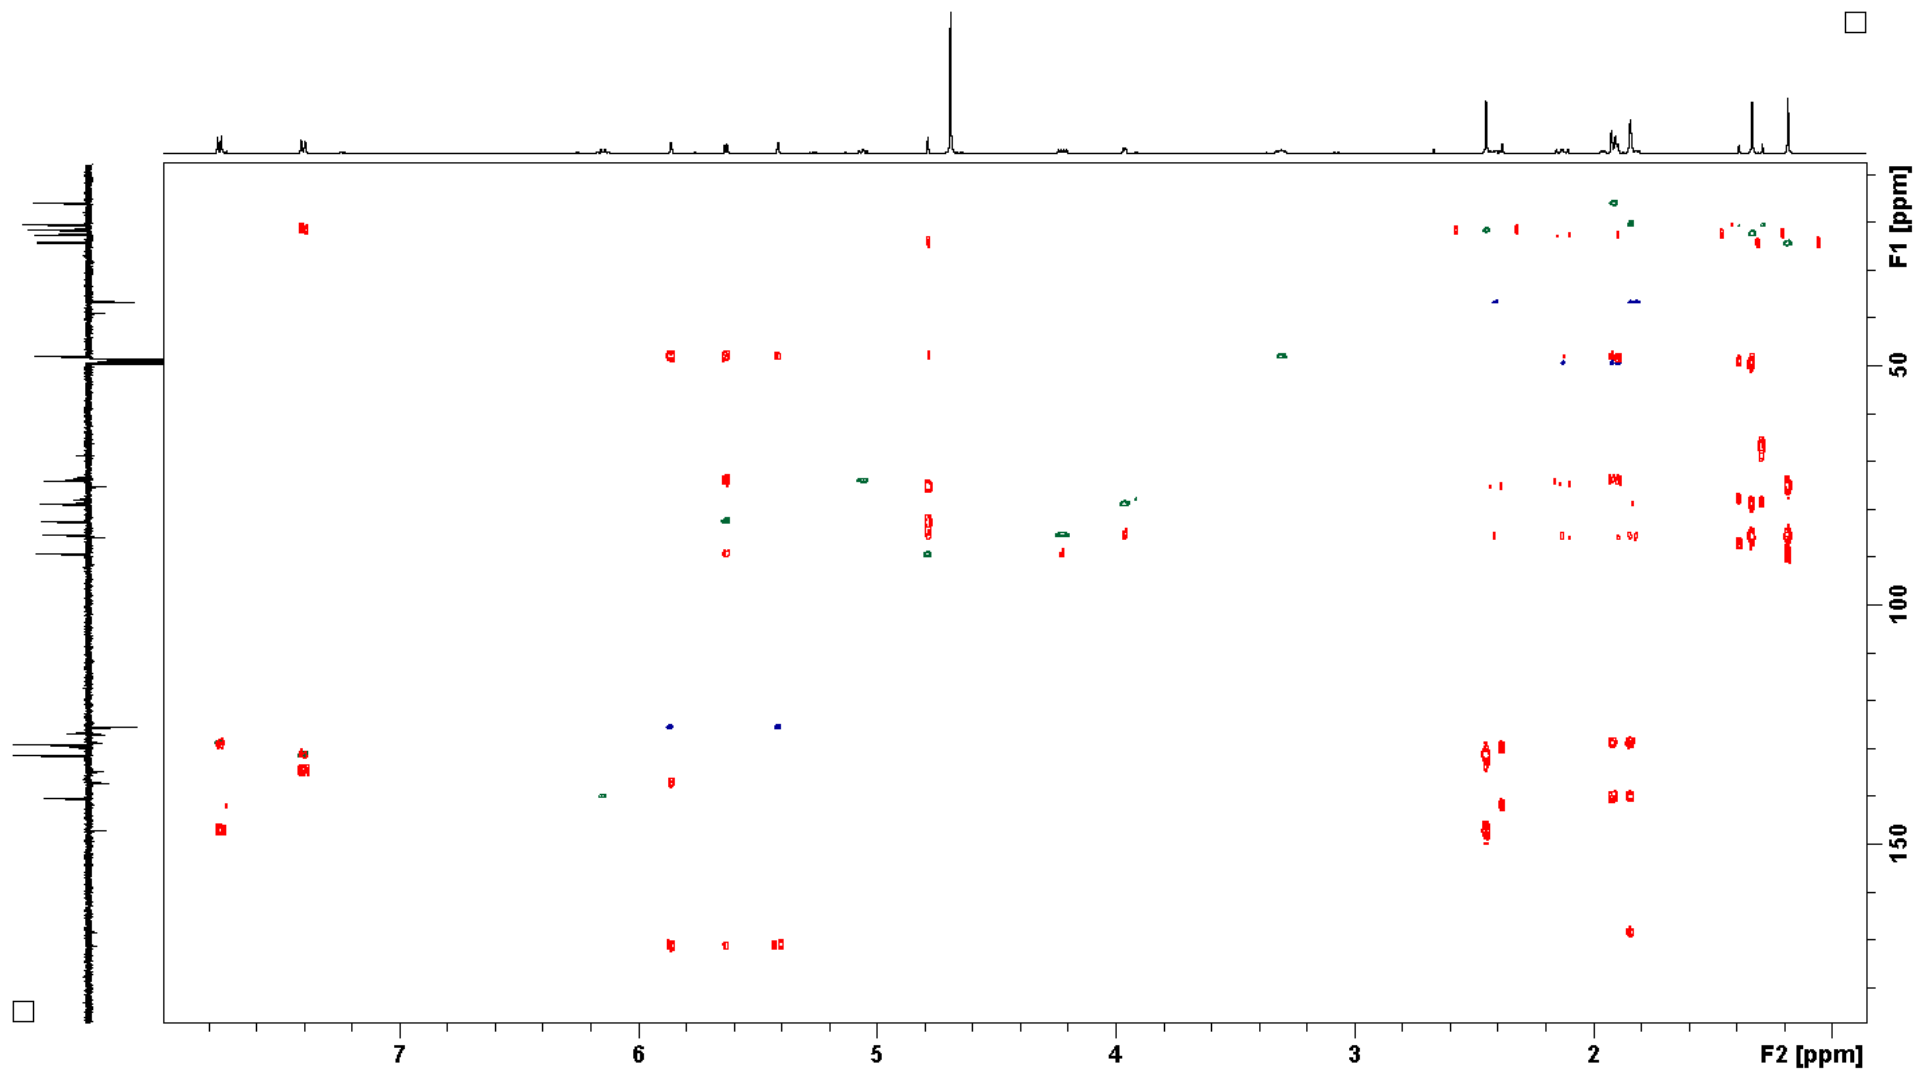

Figure S37: Overlay of HSQC and HMBC spectra of compound 9 in CD<sub>3</sub>OD.

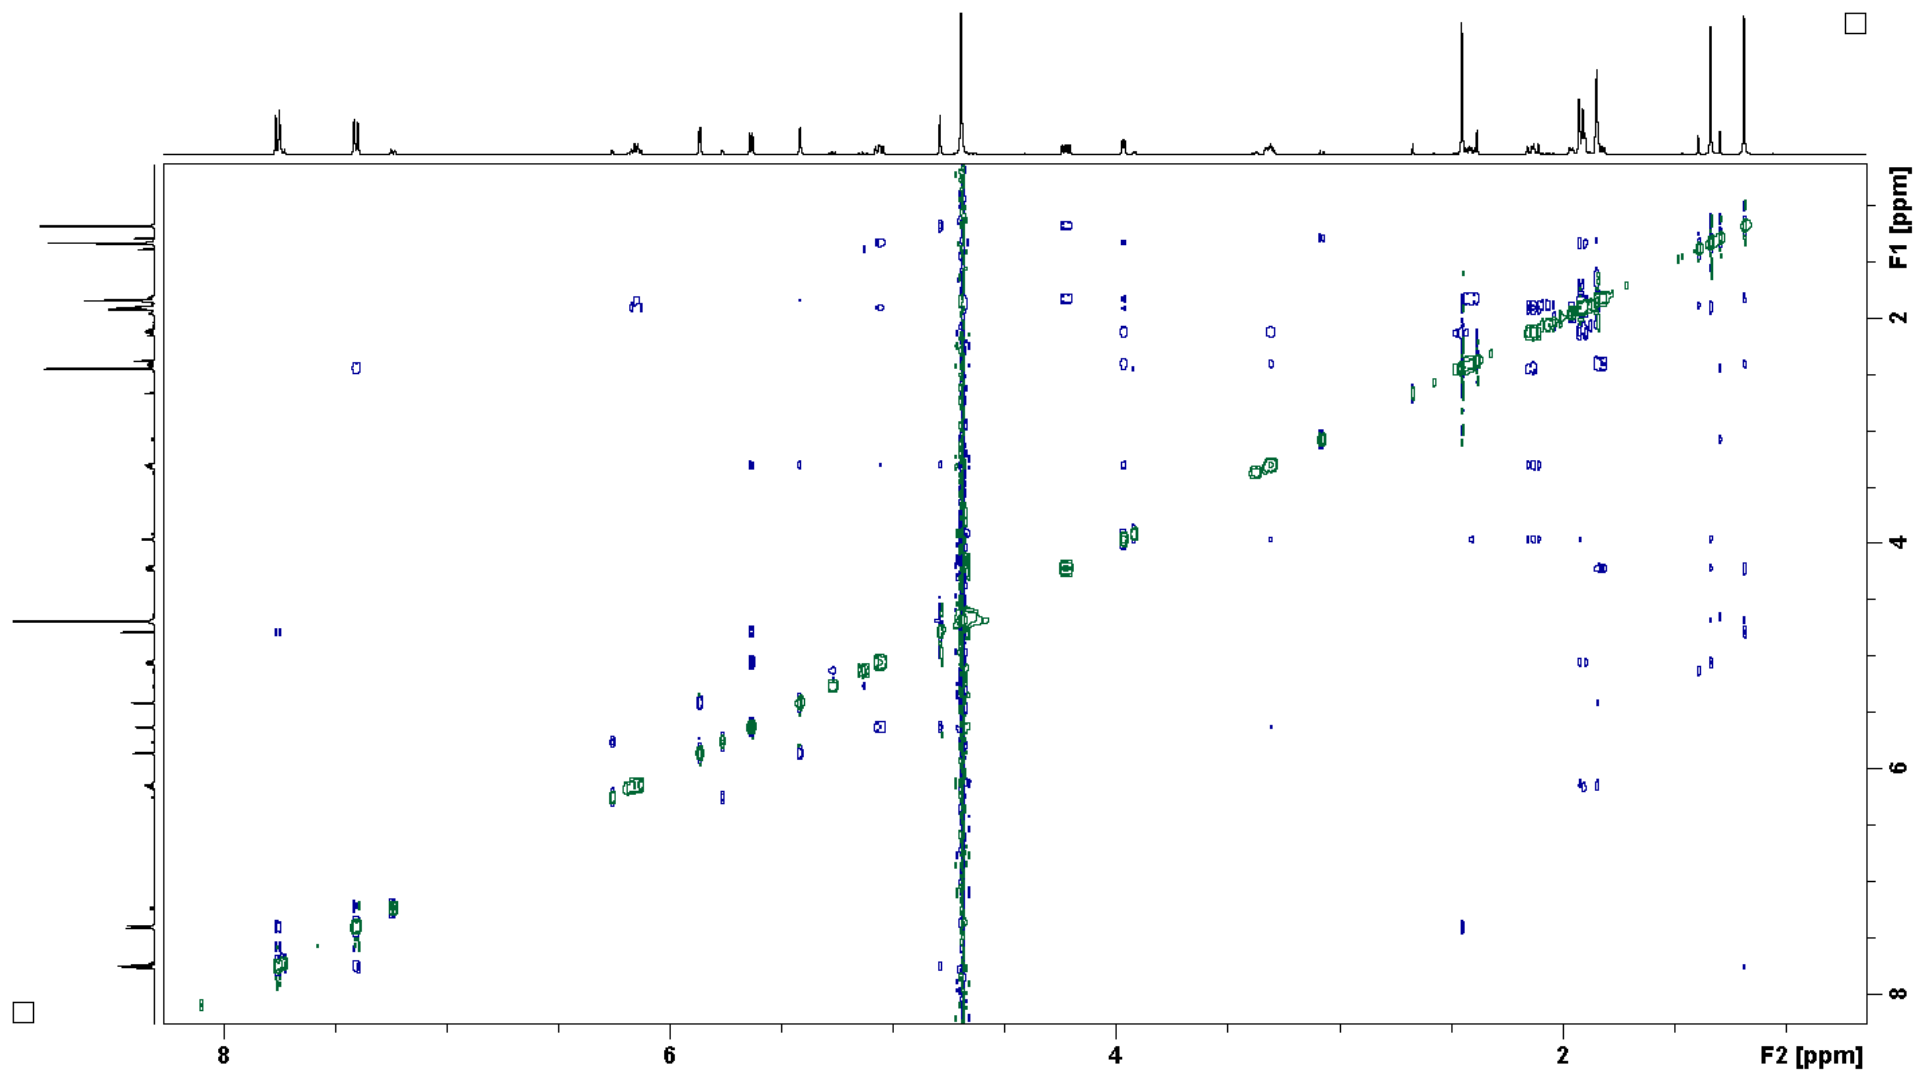

**Figure S38:** 2D  $^1\text{H}$ - $^1\text{H}$  NOESY spectrum of compound 9 in  $\text{CD}_3\text{OD}$ .

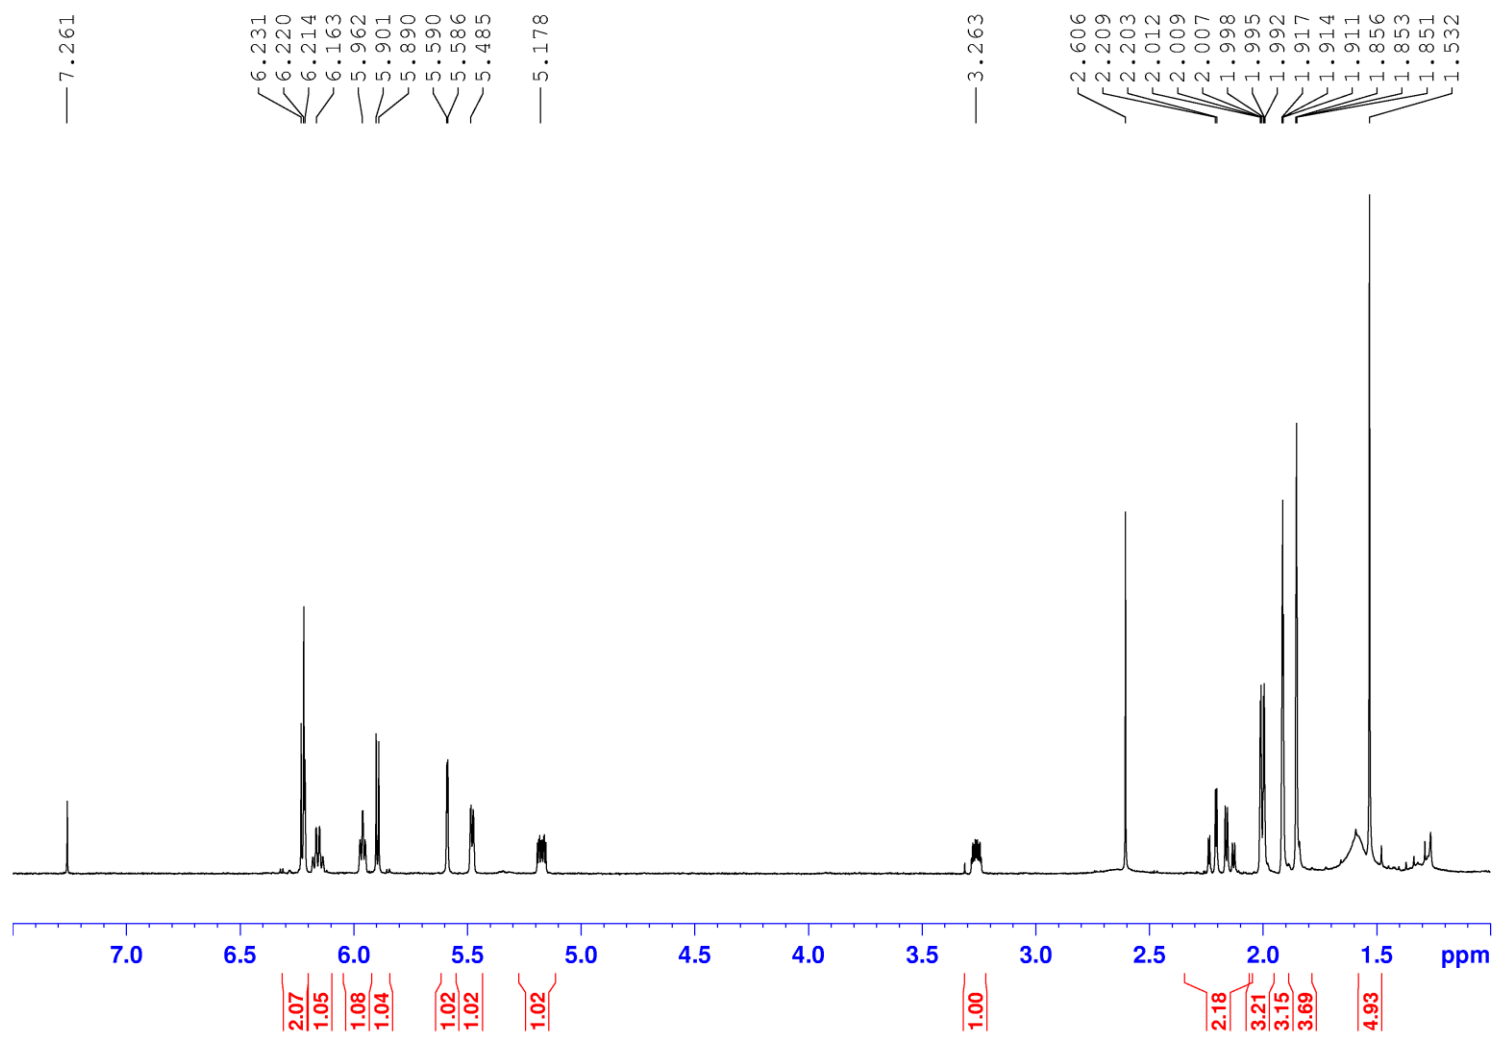

**Figure S39.** <sup>1</sup>H NMR spectrum of compound **10** in CD<sub>3</sub>OD.

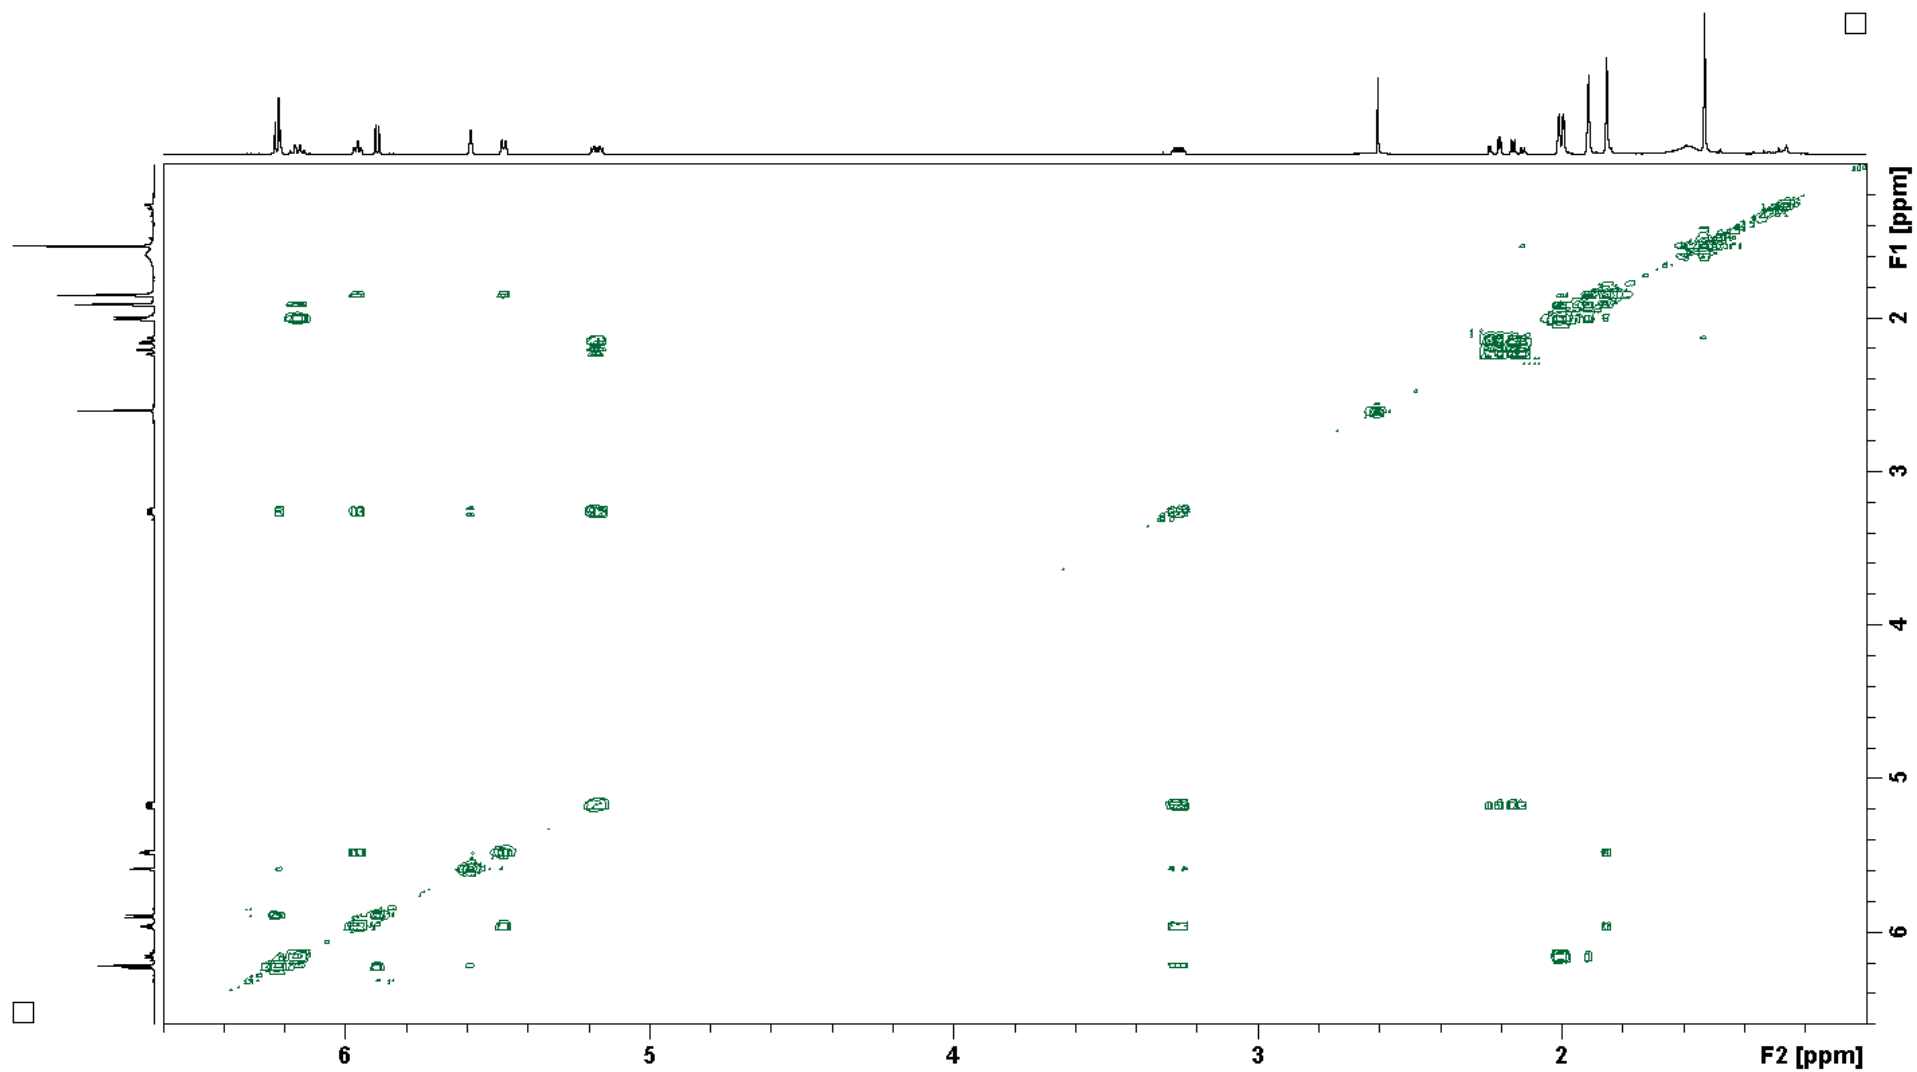

Figure S40.  $^1\text{H}$ - $^1\text{H}$ -COSY spectrum of compound 10 in  $\text{CD}_3\text{OD}$ .

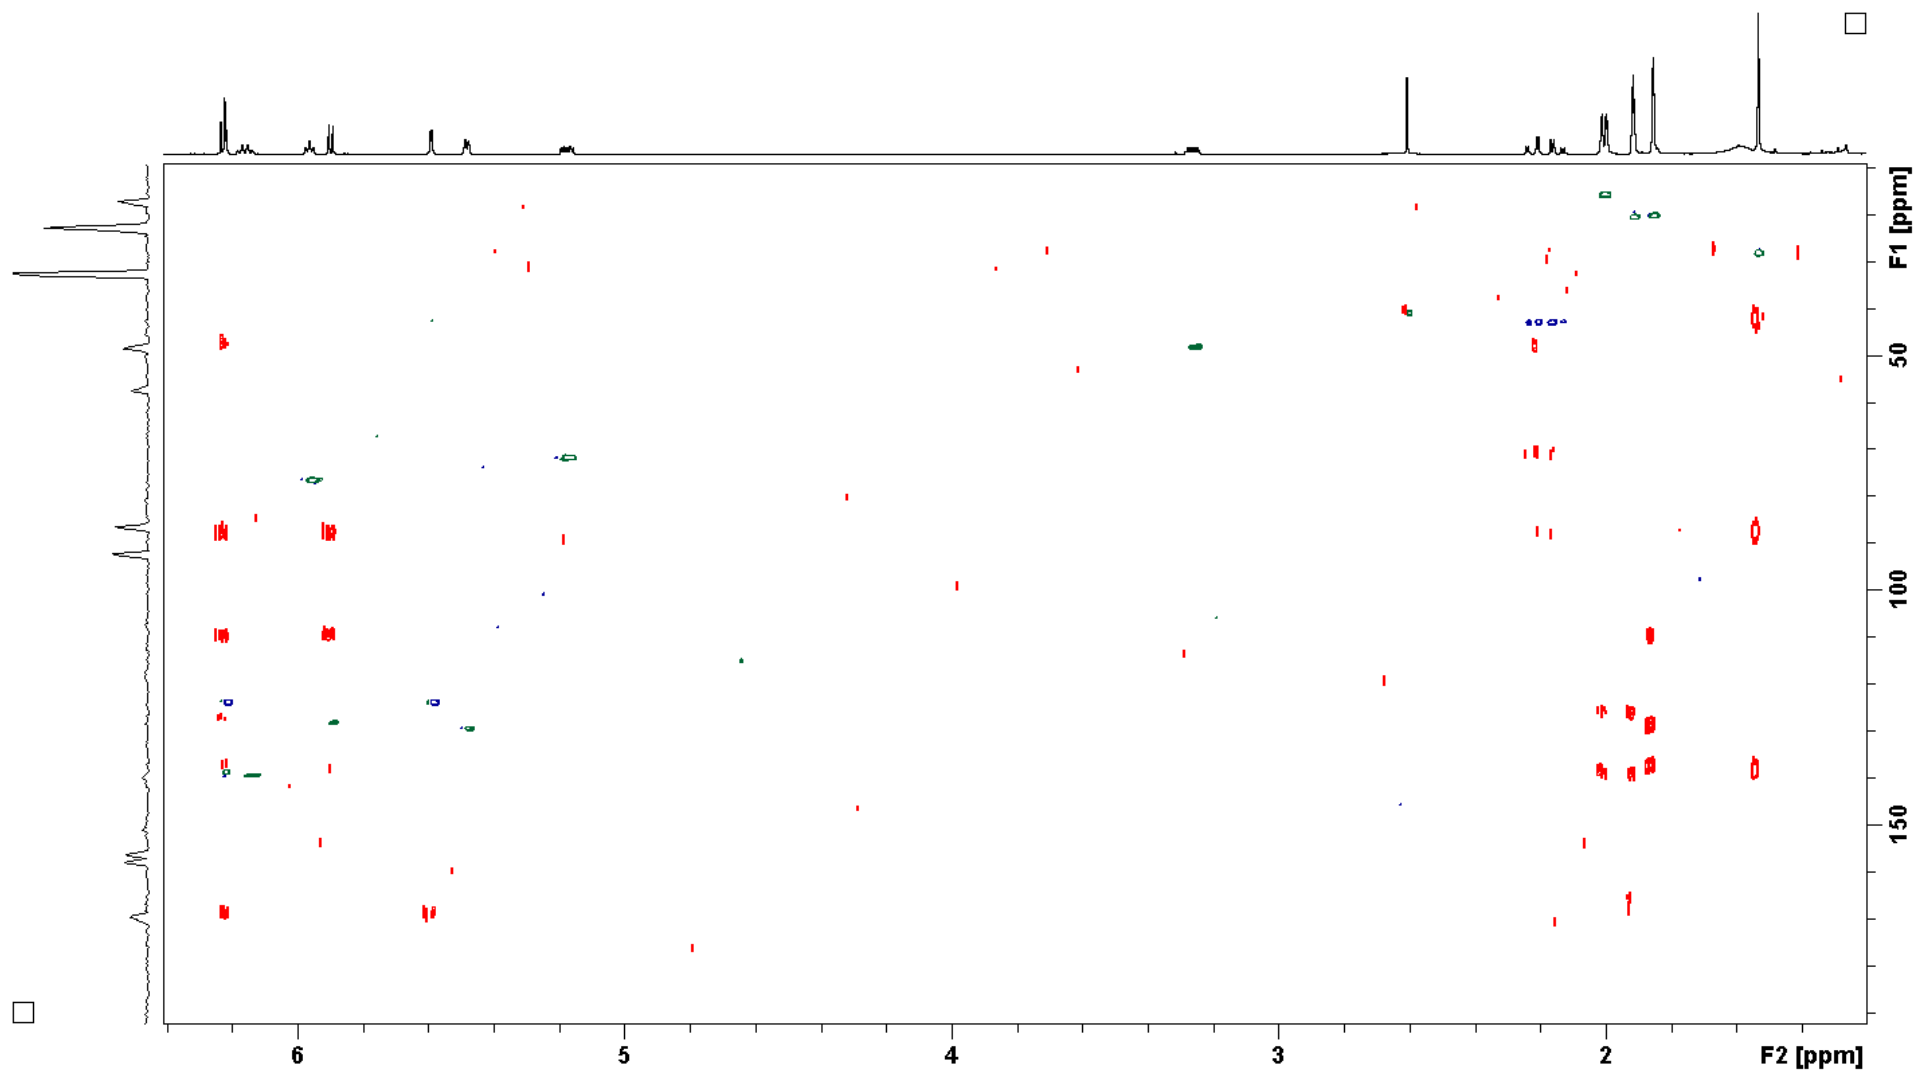

**Figure S41.** HSQC (green) and HMBC (red) overlaid spectra of compound **10** in CD<sub>3</sub>OD.

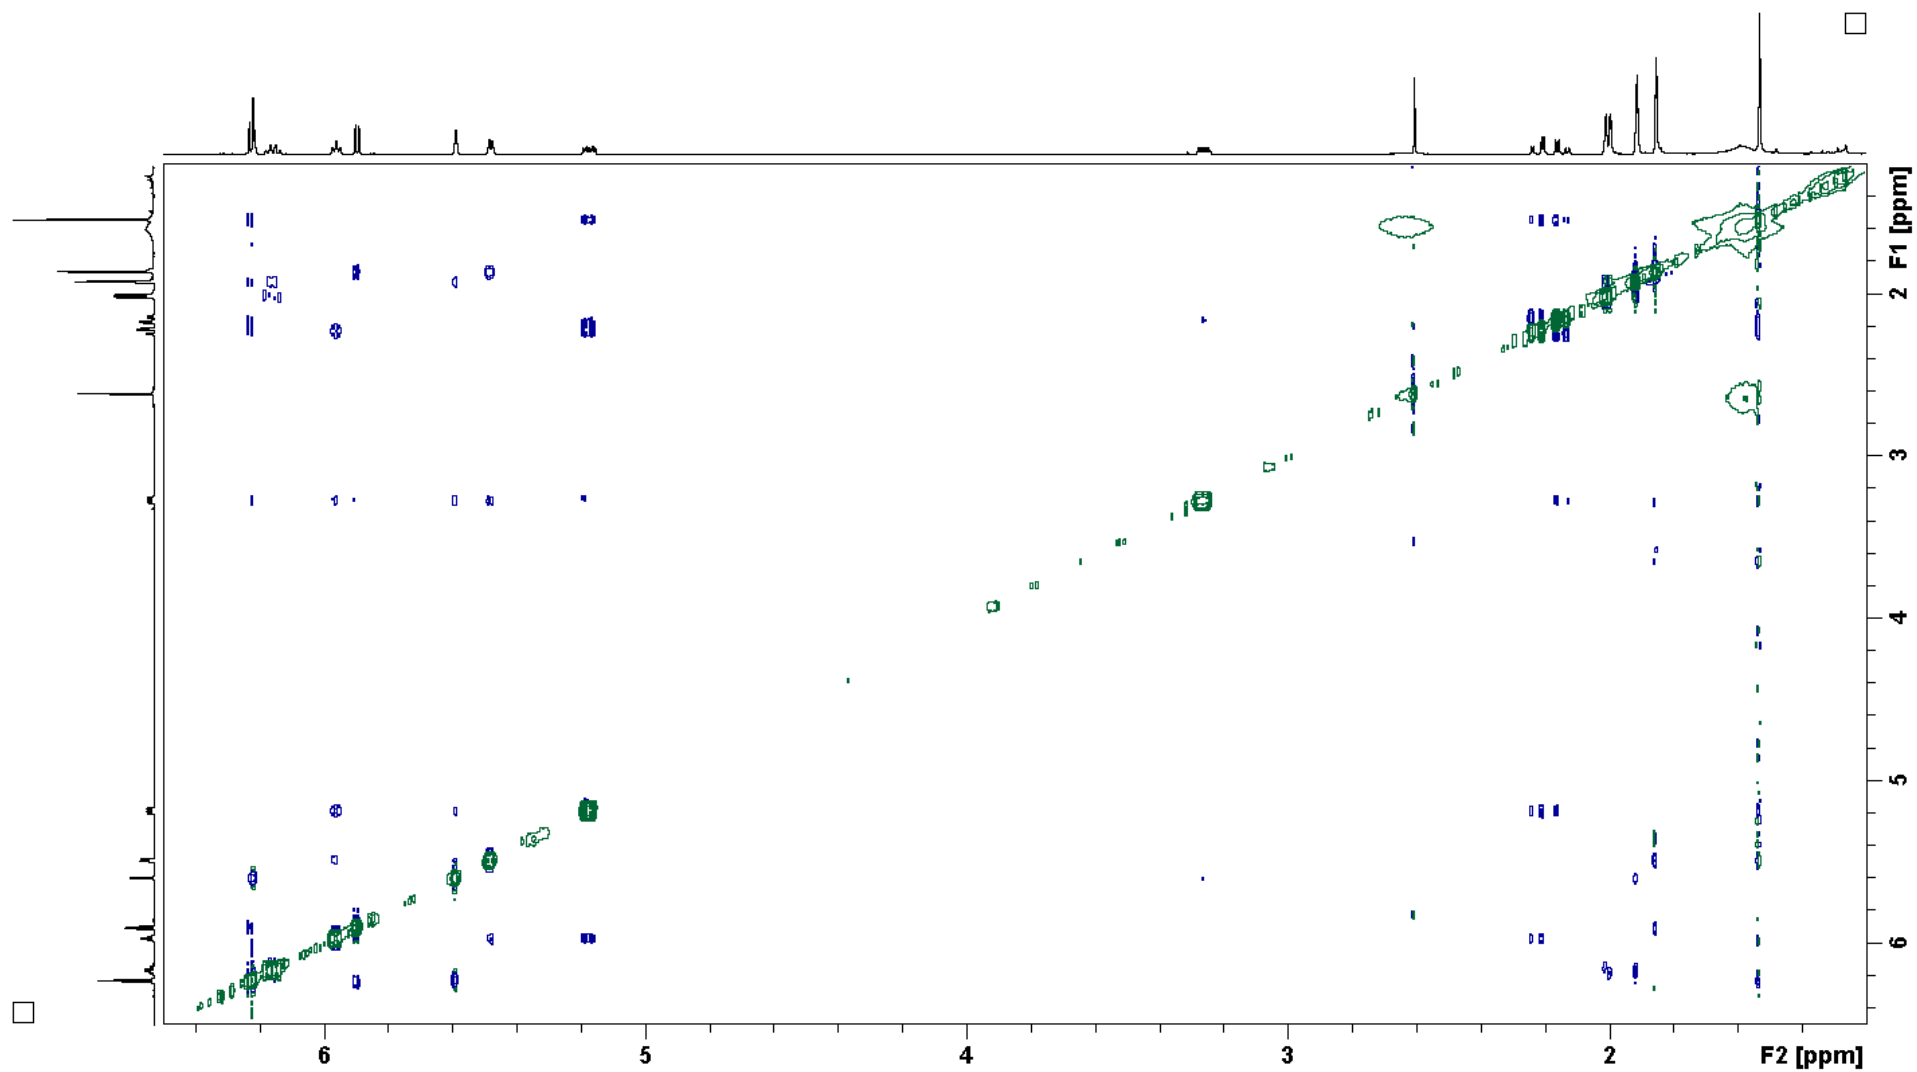

**Figure S42:** 2D  $^1\text{H}$ - $^1\text{H}$  NOESY spectrum of compound **10** in  $\text{CD}_3\text{OD}$ .

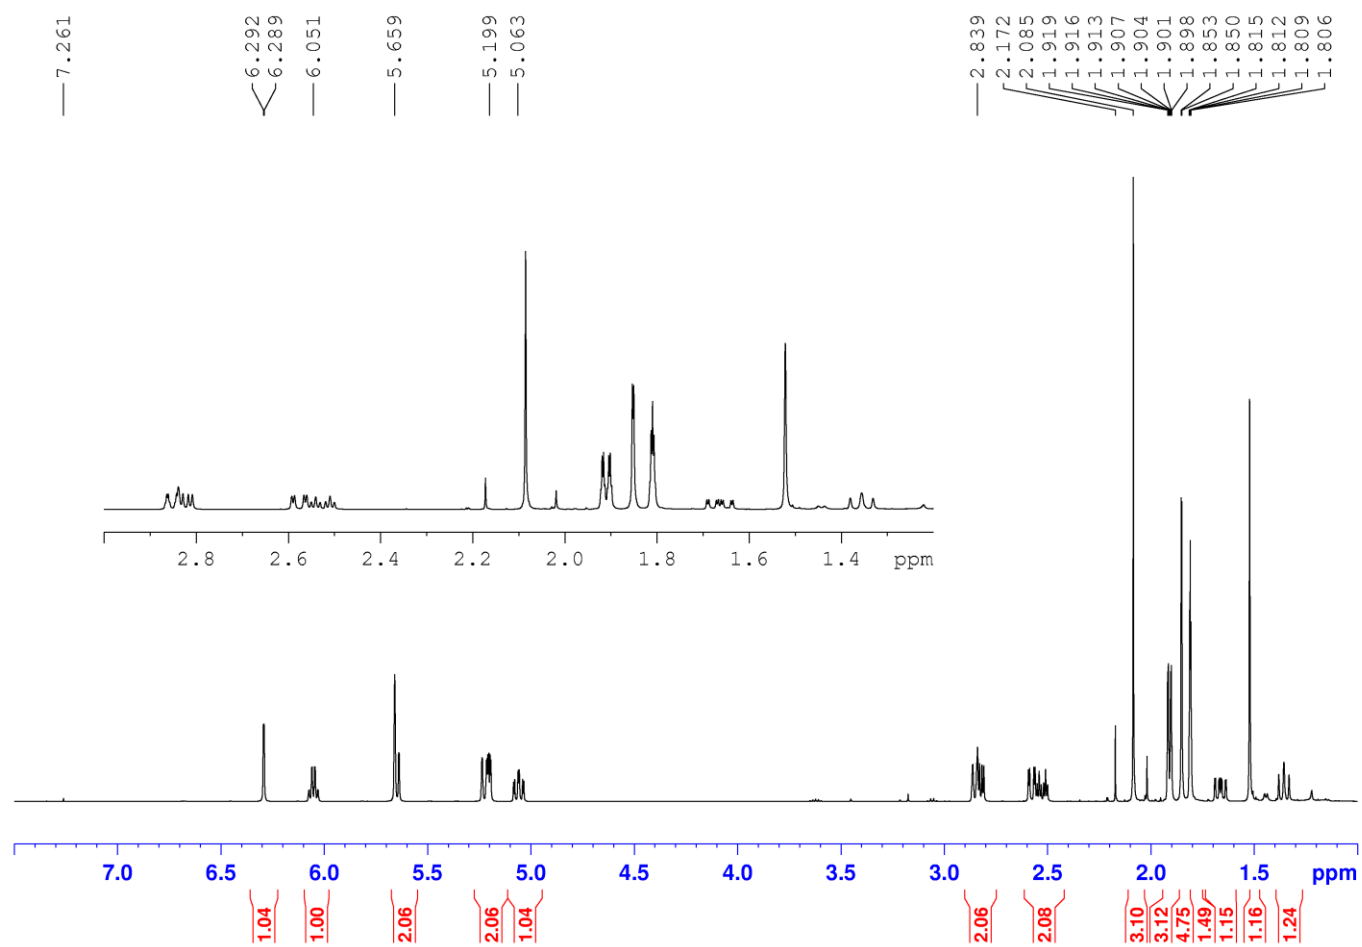

**Figure S43:** <sup>1</sup>H-NMR spectrum of compound **11** in CDCl<sub>3</sub>.

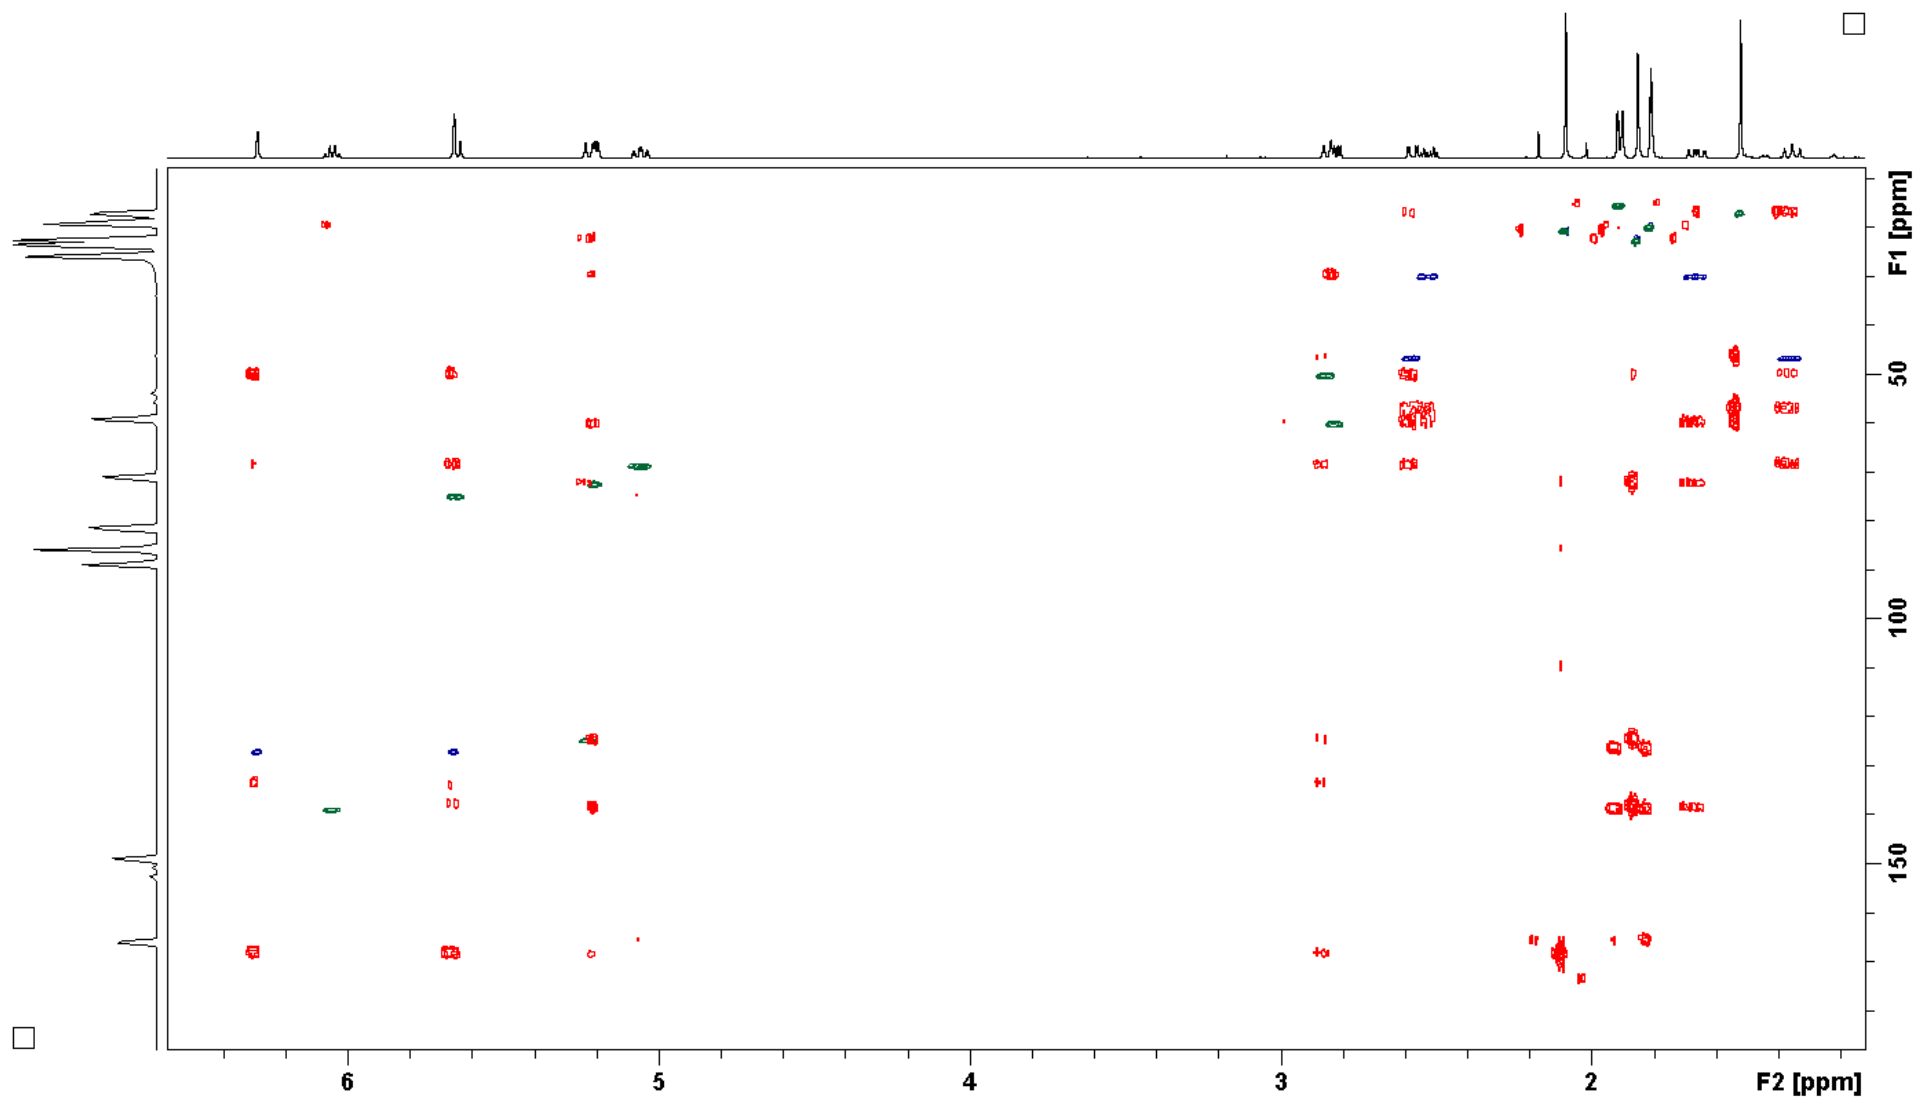

**Figure S44:** Overlay of HSQC and HMBC spectra of compound **11** in CDCl<sub>3</sub>.

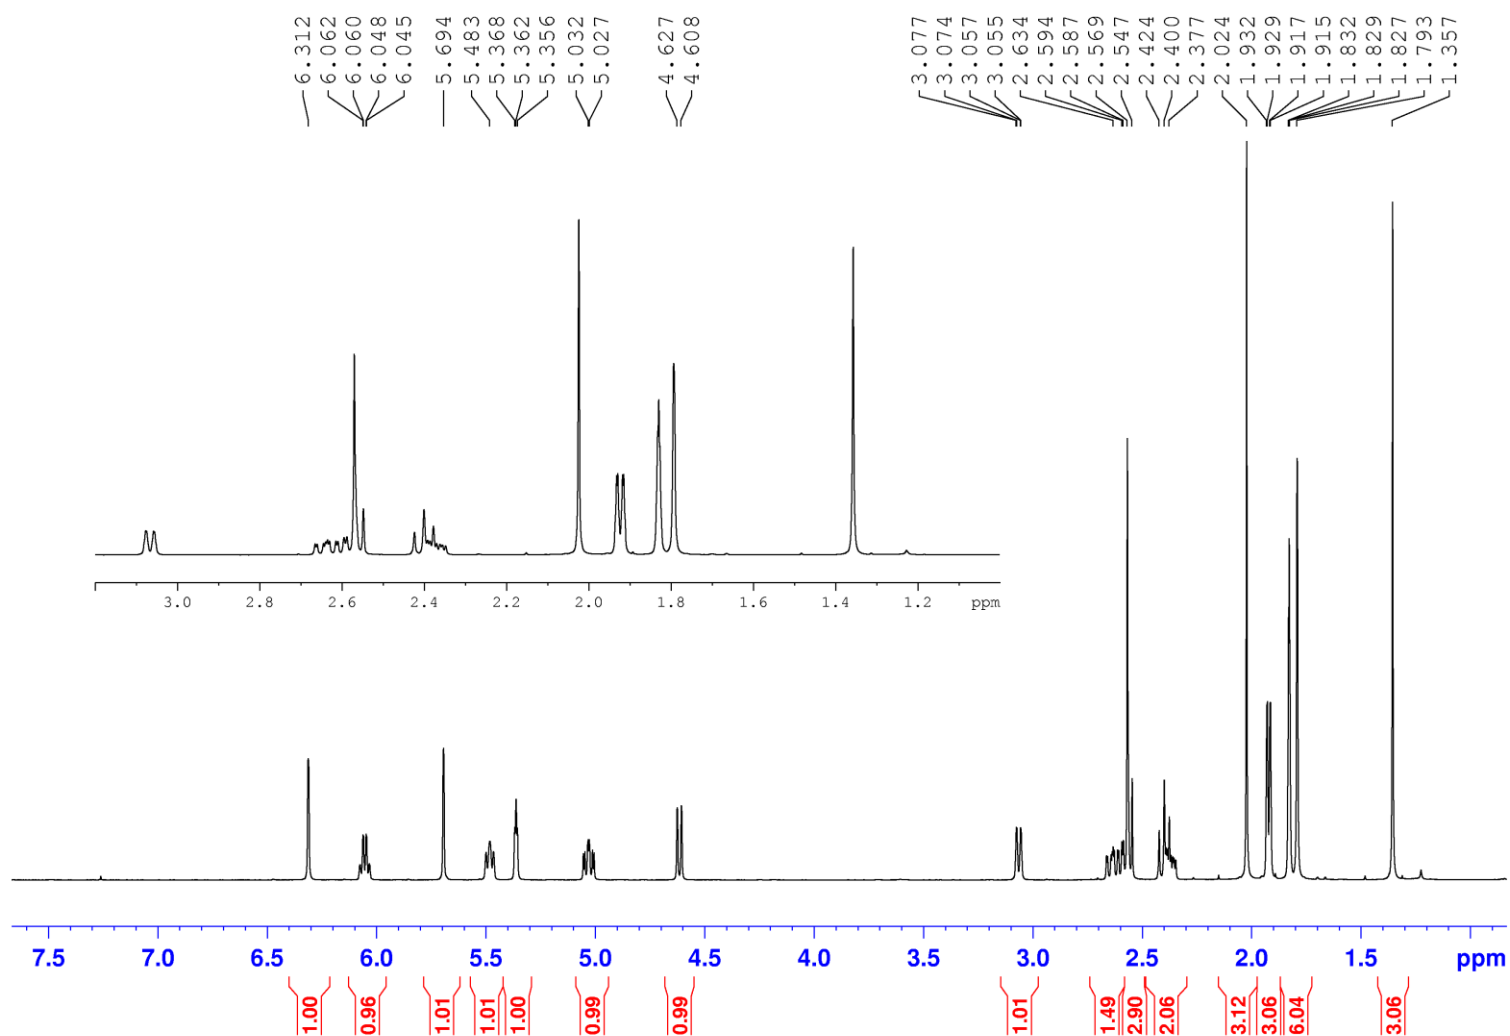

**Figure S45:**  $^1\text{H}$ -NMR spectrum of compound **12** in  $\text{CDCl}_3$ .

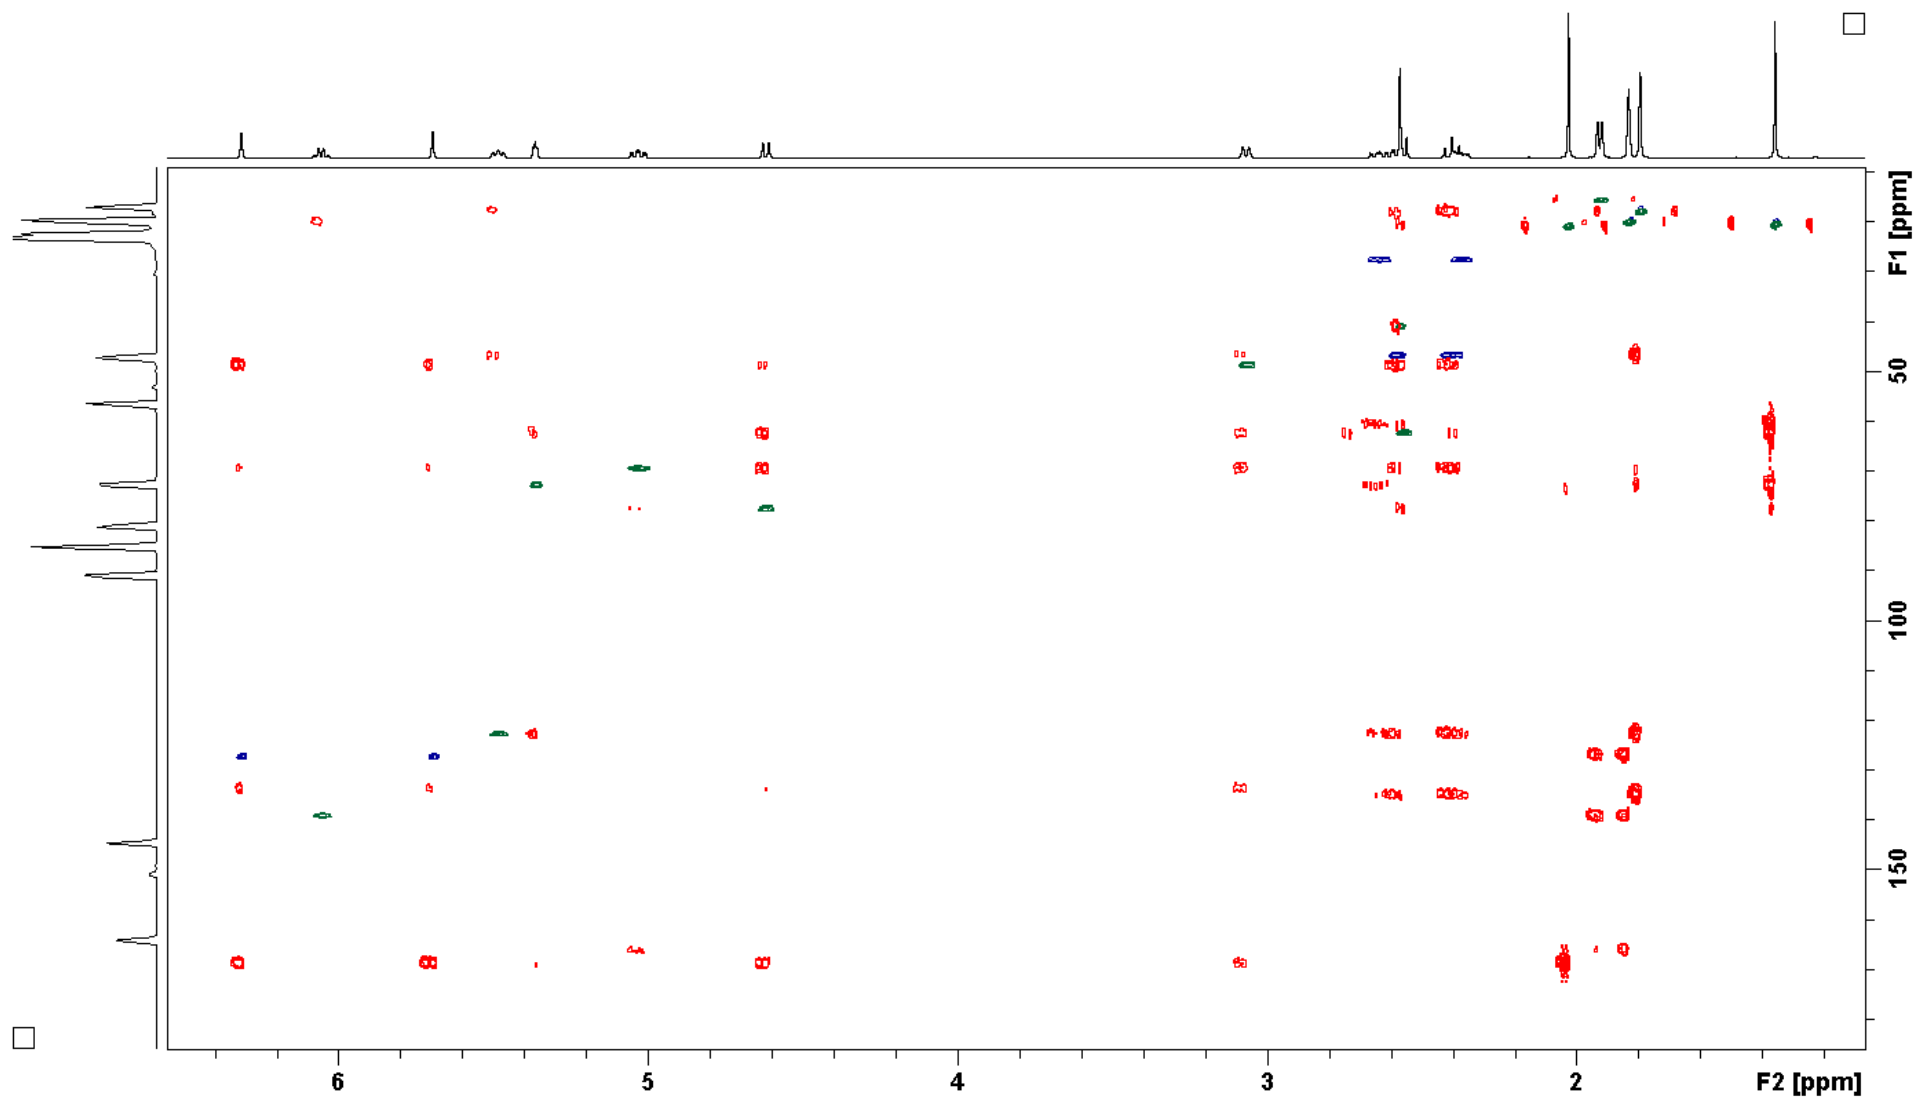

Figure S46: Overlay of HSQC and HMBC spectra of compound **12** in CDCl<sub>3</sub>.

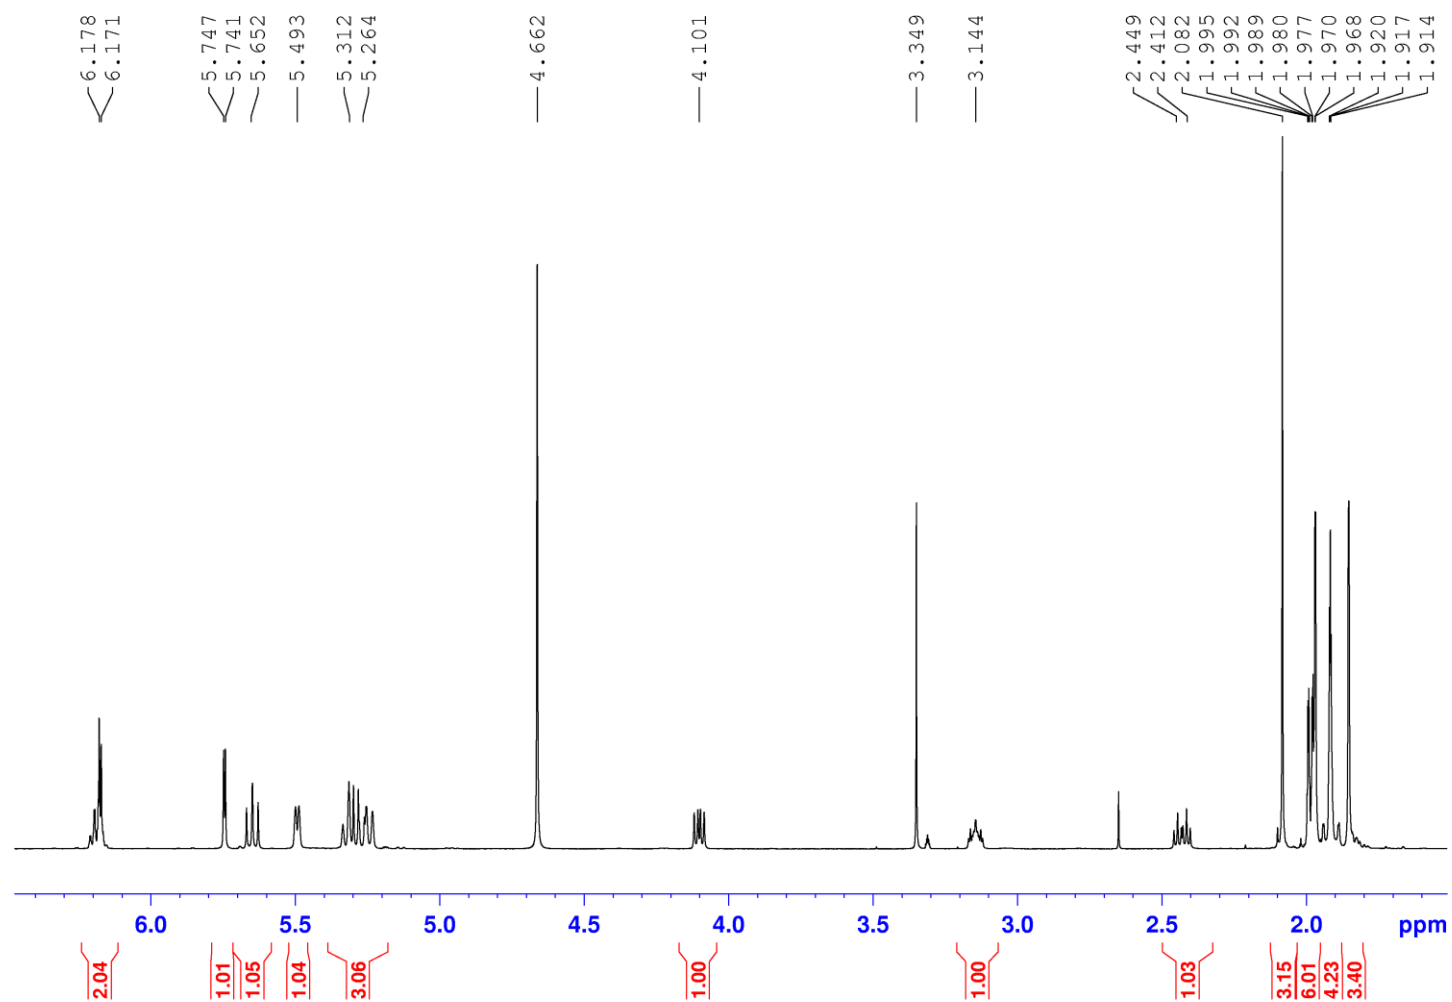

**Figure S47:** <sup>1</sup>H NMR spectrum of compound 13 in CD<sub>3</sub>OD.

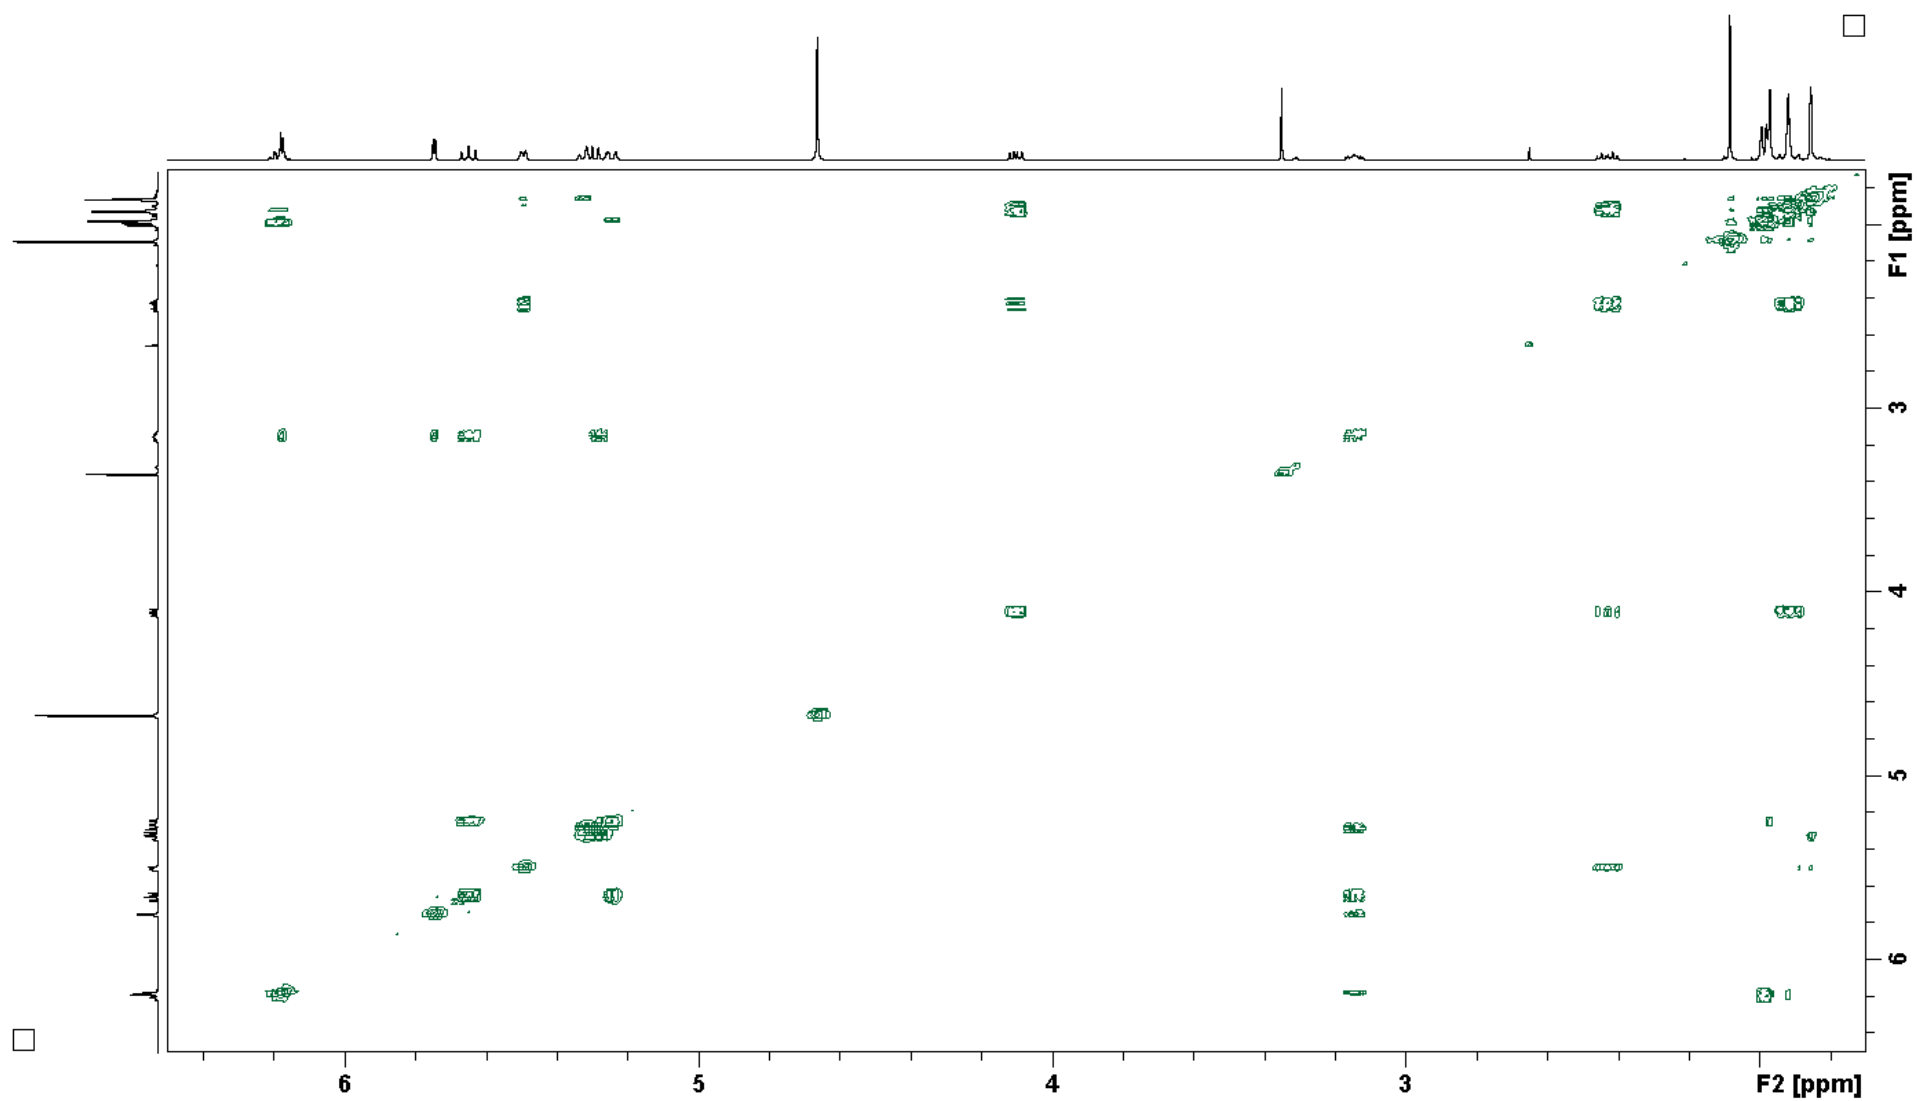

Figure S48:  $^1\text{H}$ - $^1\text{H}$ -COSY spectrum of compound 13 in  $\text{CD}_3\text{OD}$ .

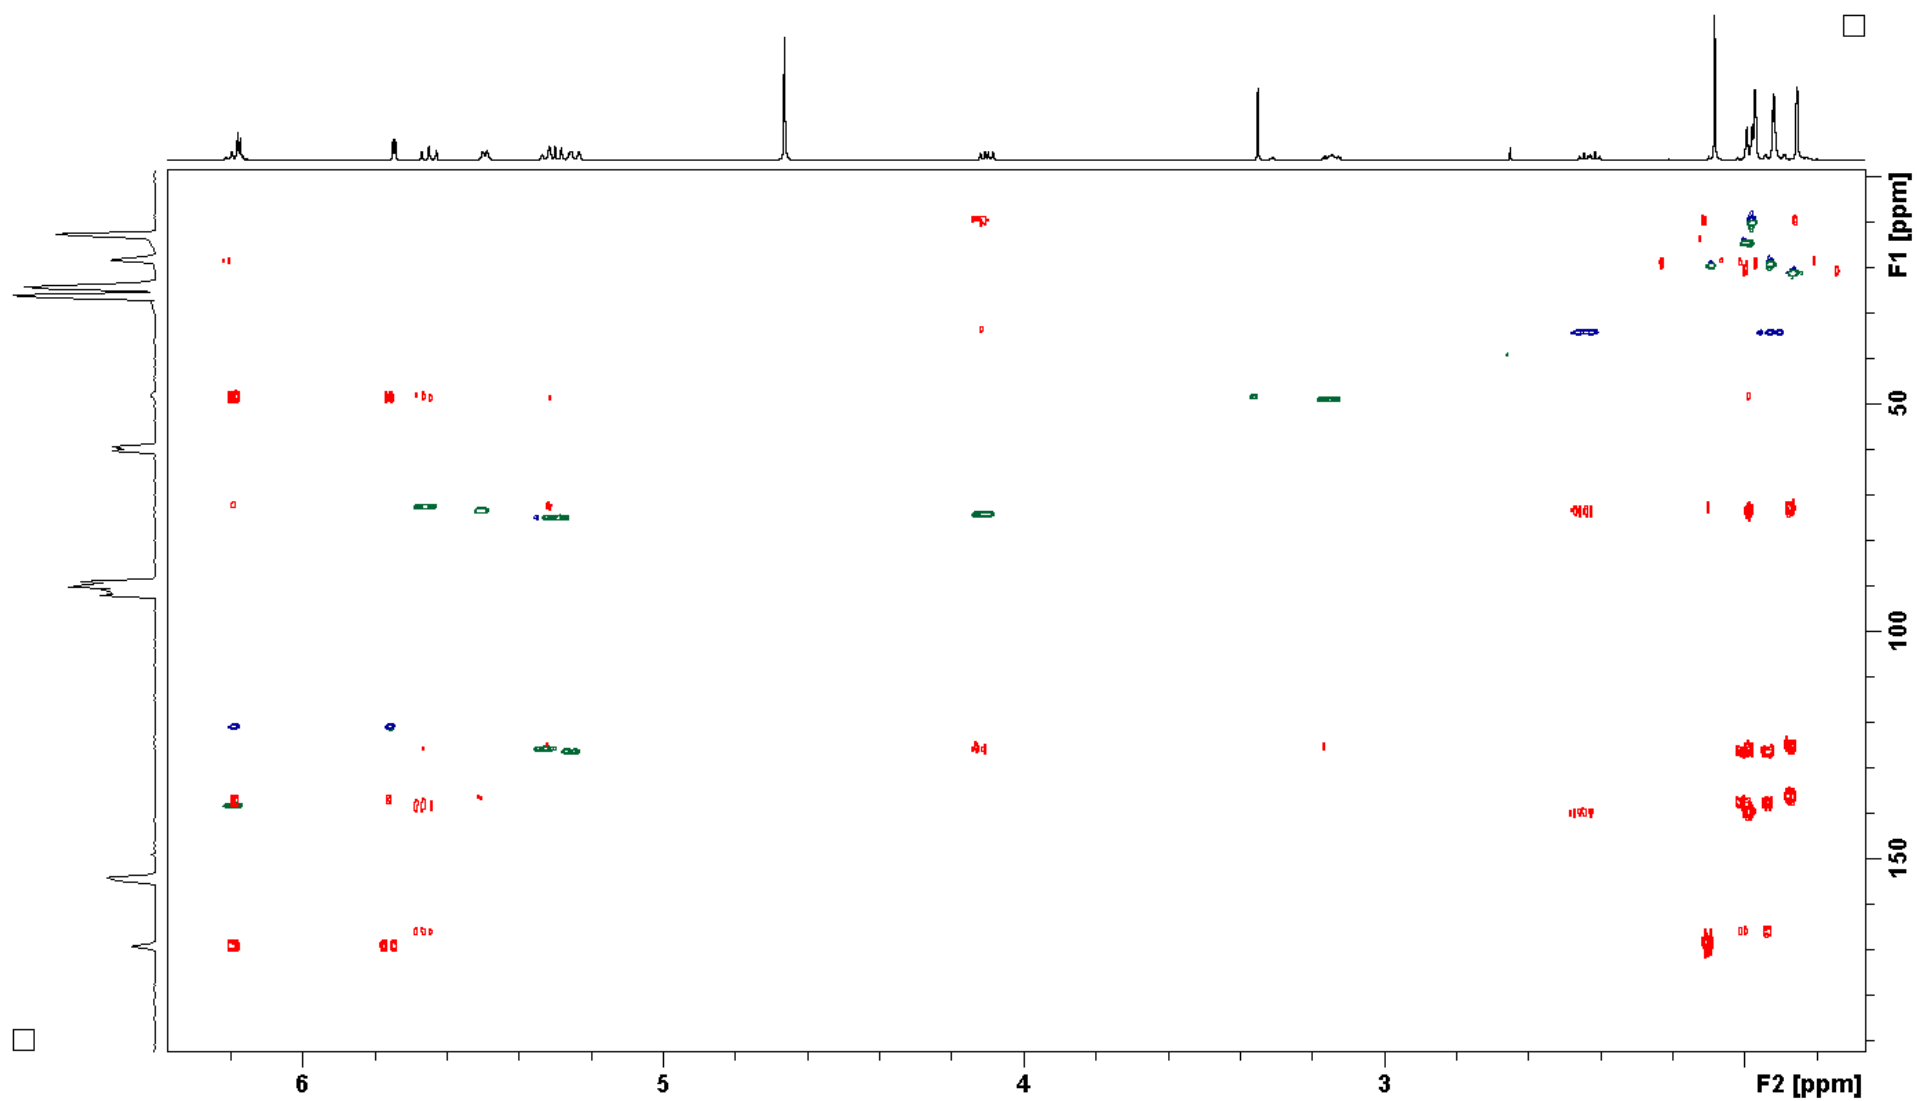

**Figure S49:** HSQC (green) and HMBC (red) overlaid spectra of compound **13** in CD<sub>3</sub>OD.

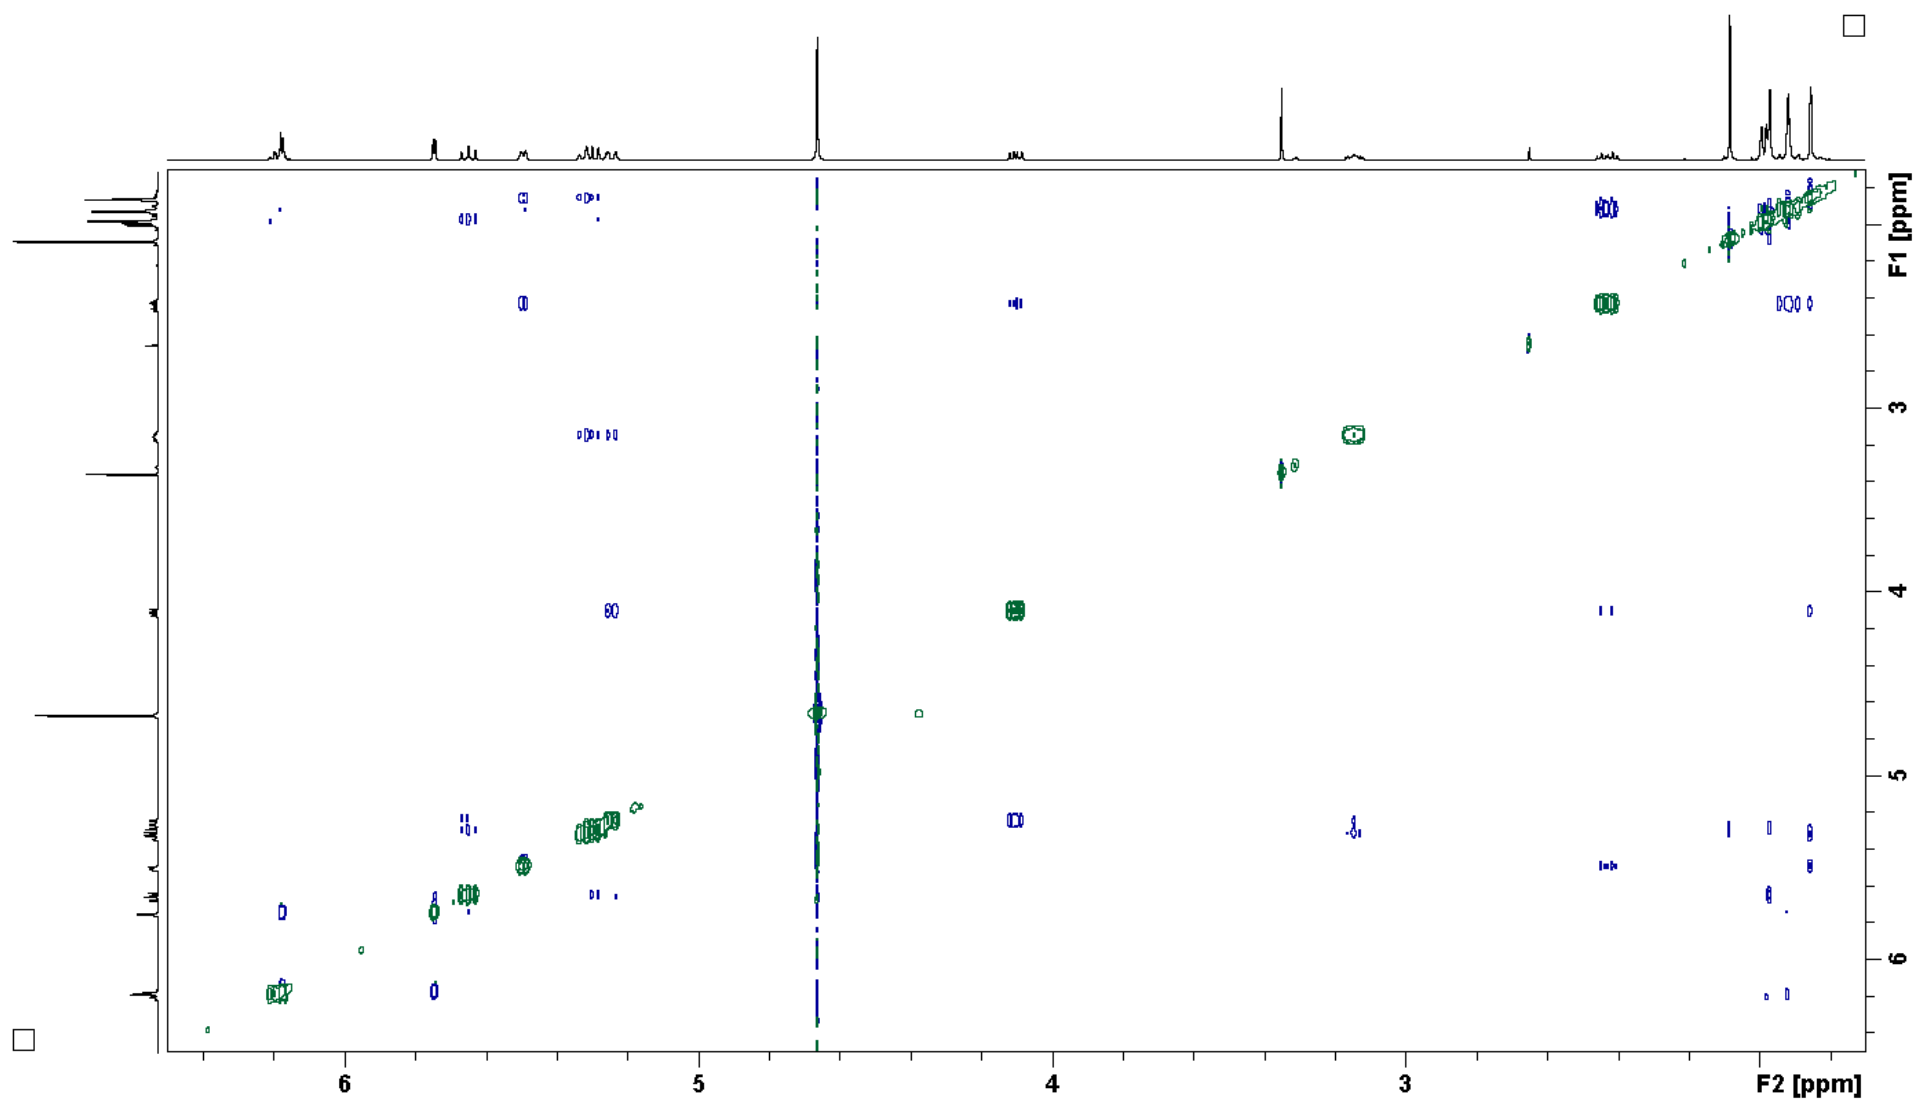

Figure S50: 2D  $^1\text{H}$ - $^1\text{H}$  NOESY spectrum of compound **13** in  $\text{CD}_3\text{OD}$ .

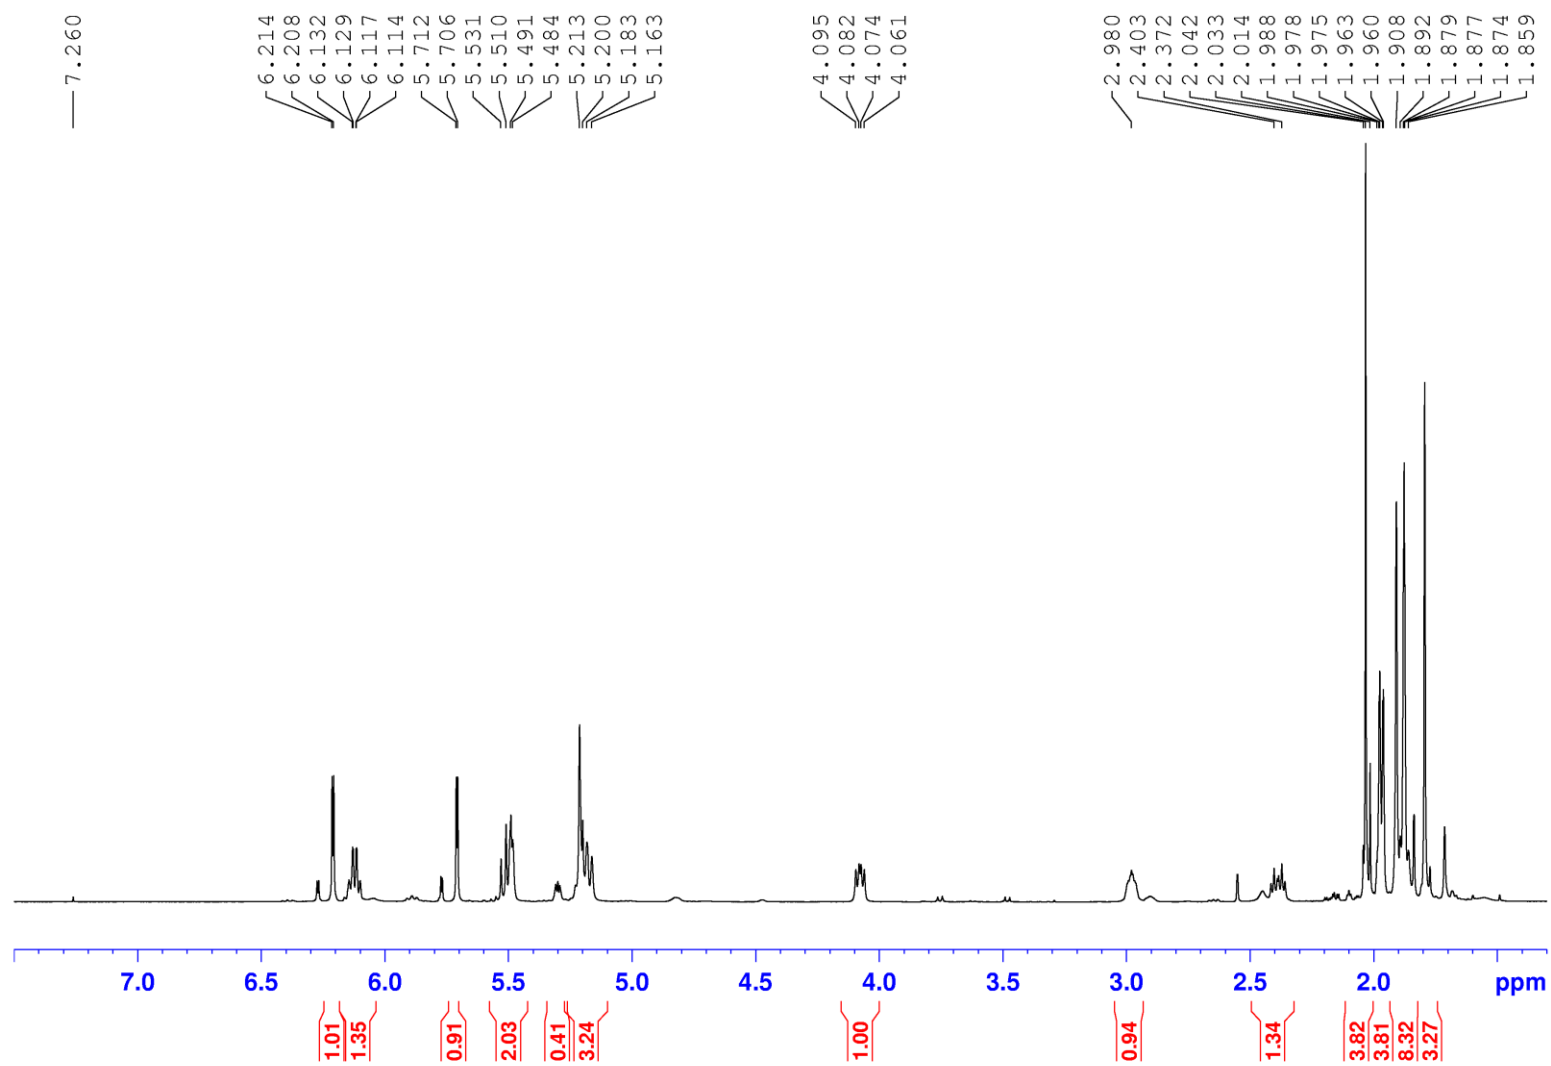

**Figure S51:** <sup>1</sup>H NMR spectrum of compound **14** in CD<sub>3</sub>OD.

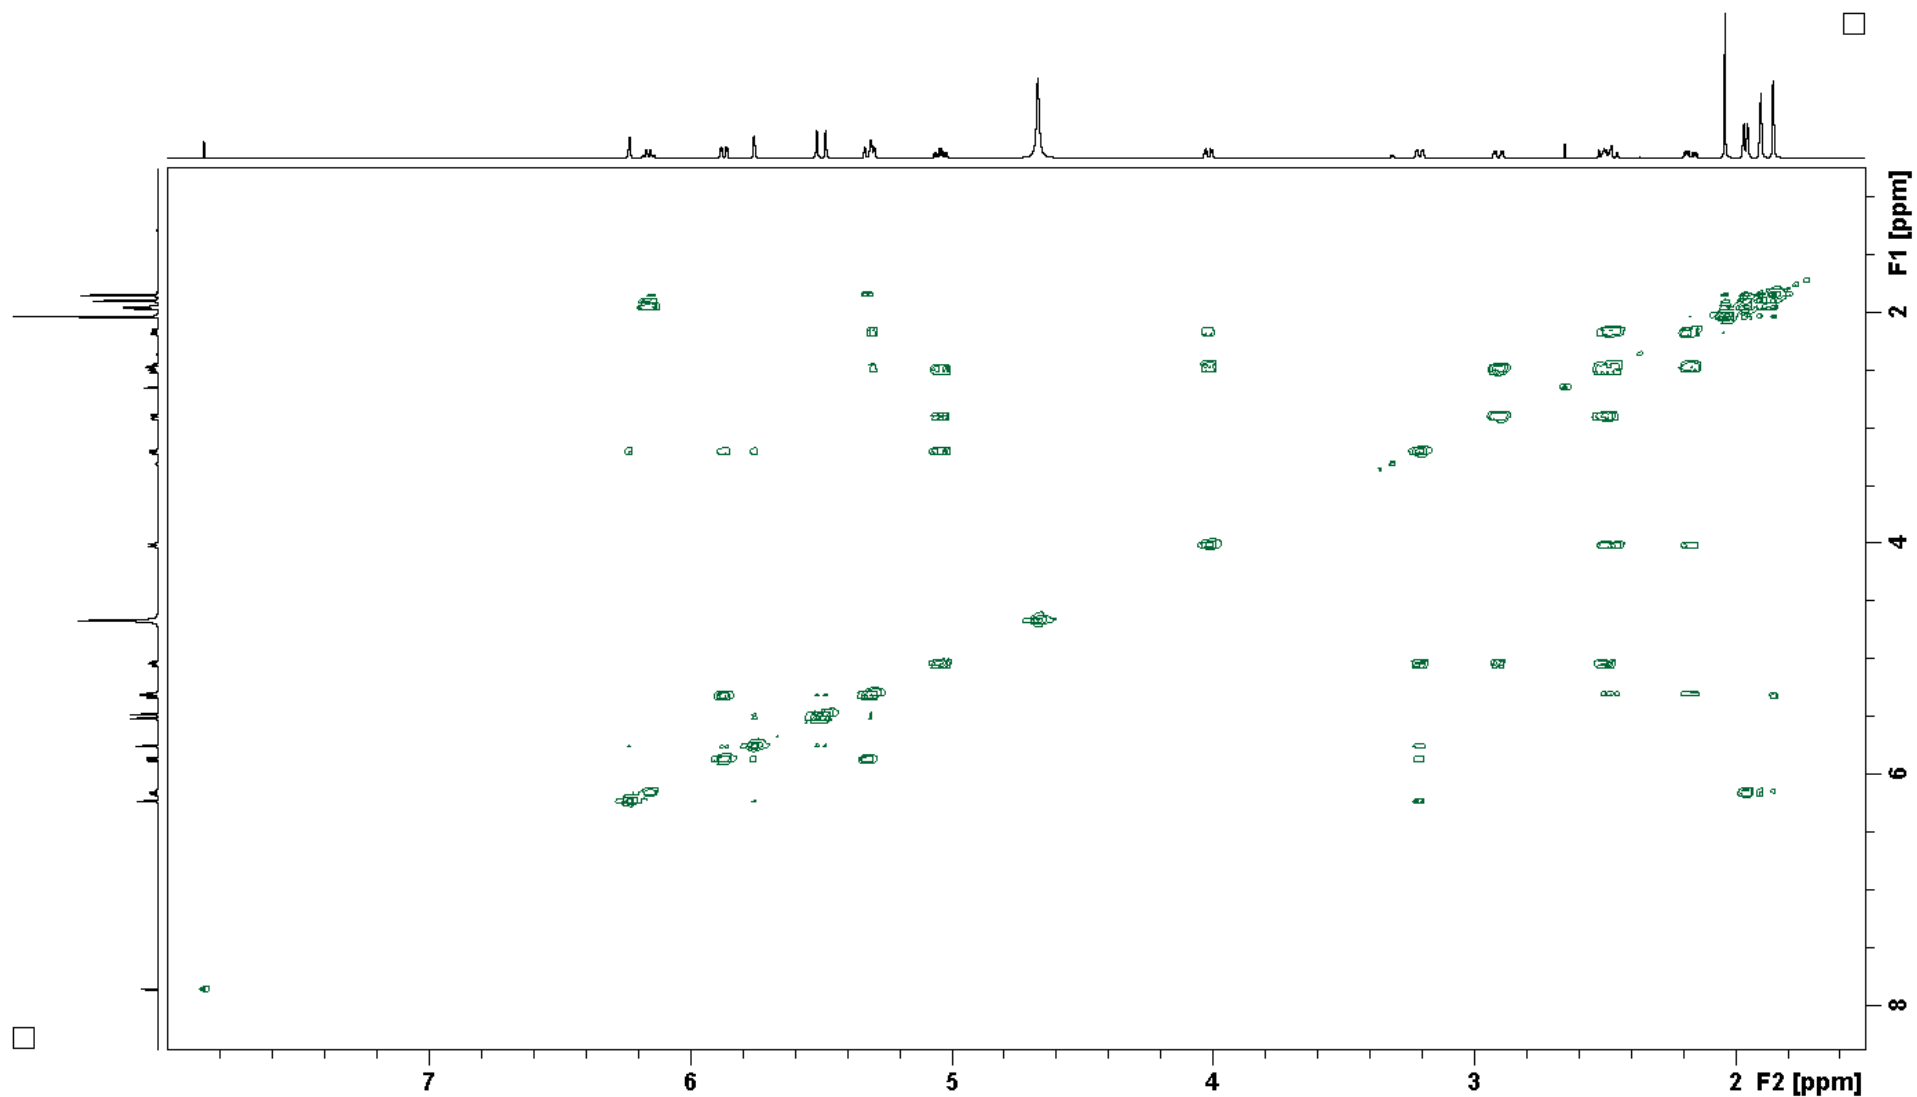

**Figure S52:**  $^1\text{H}$ - $^1\text{H}$ -COSY spectrum of compound **14** in  $\text{CD}_3\text{OD}$ .

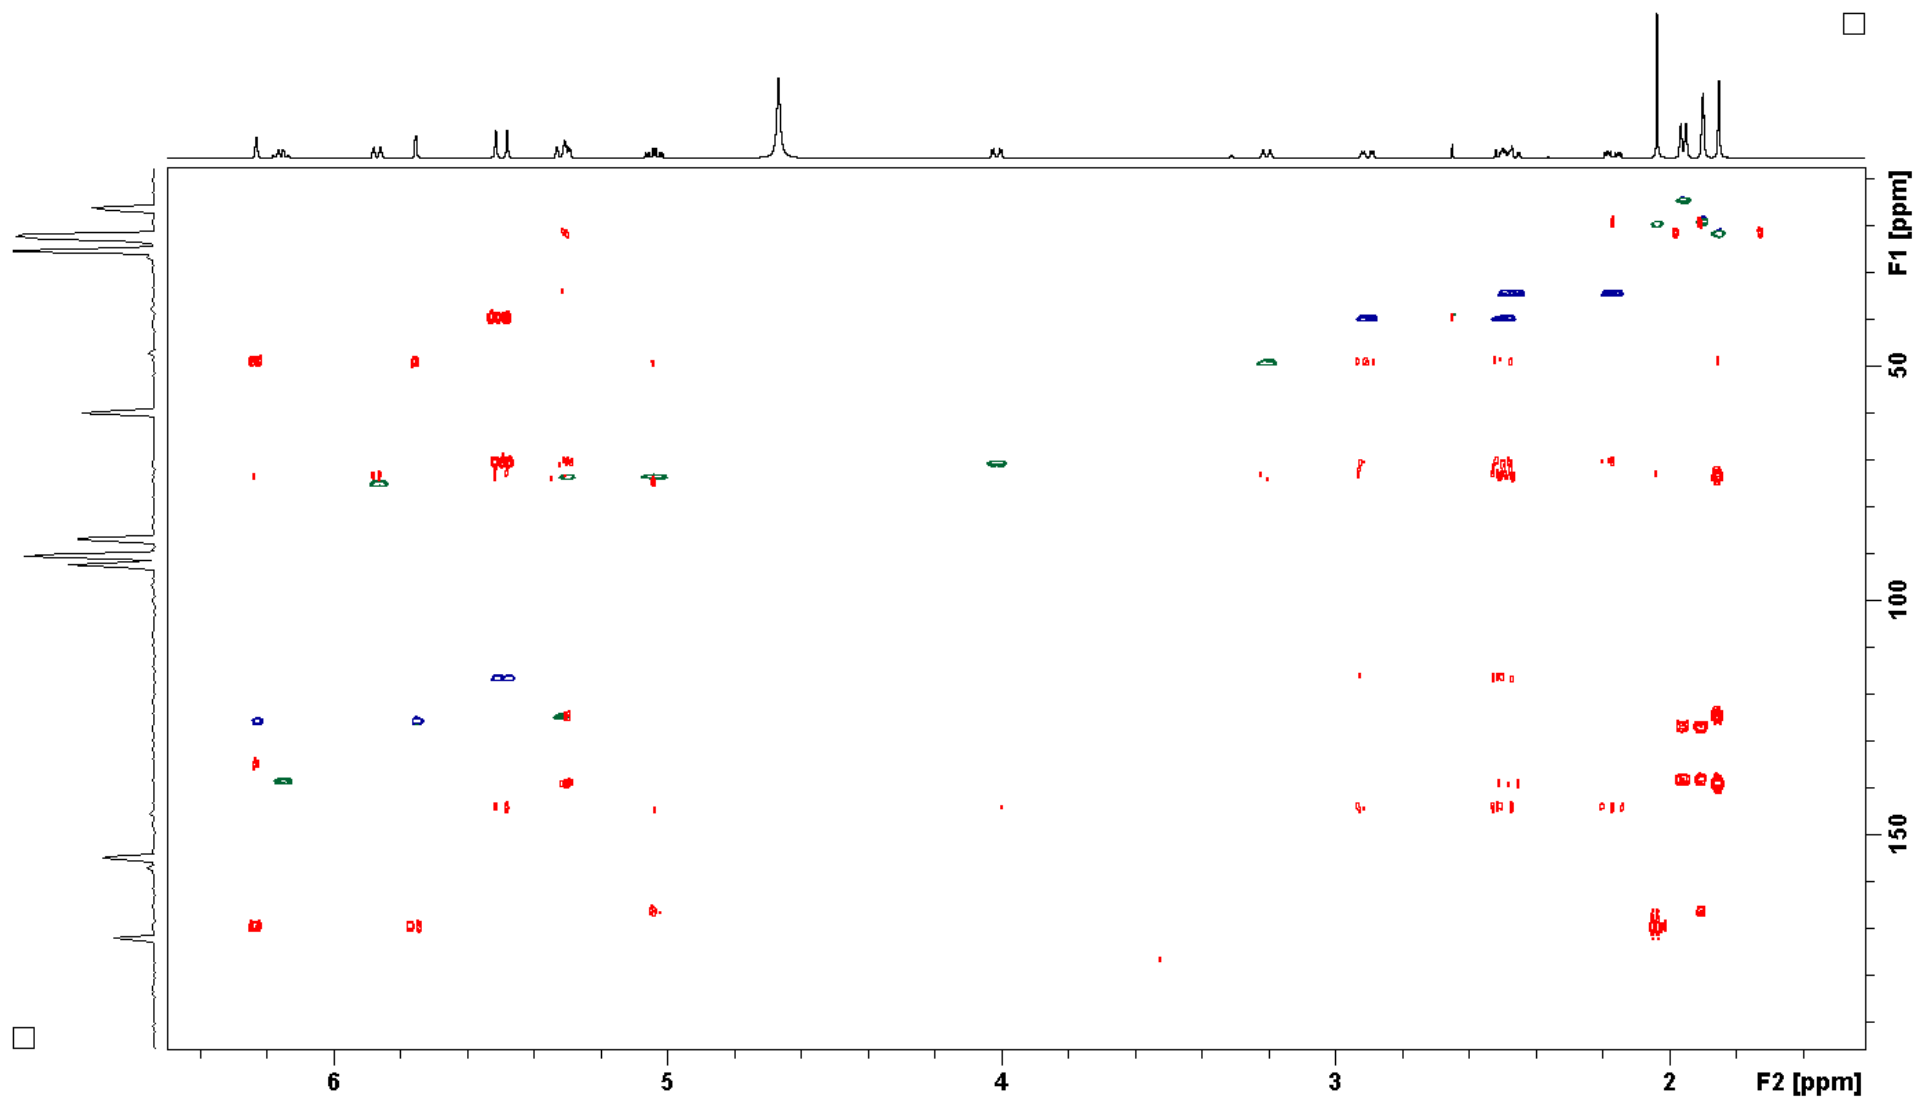

**Figure S53:** HSQC (green) and HMBC (red) overlaid spectra of compound **14** in  $\text{CD}_3\text{OD}$ .

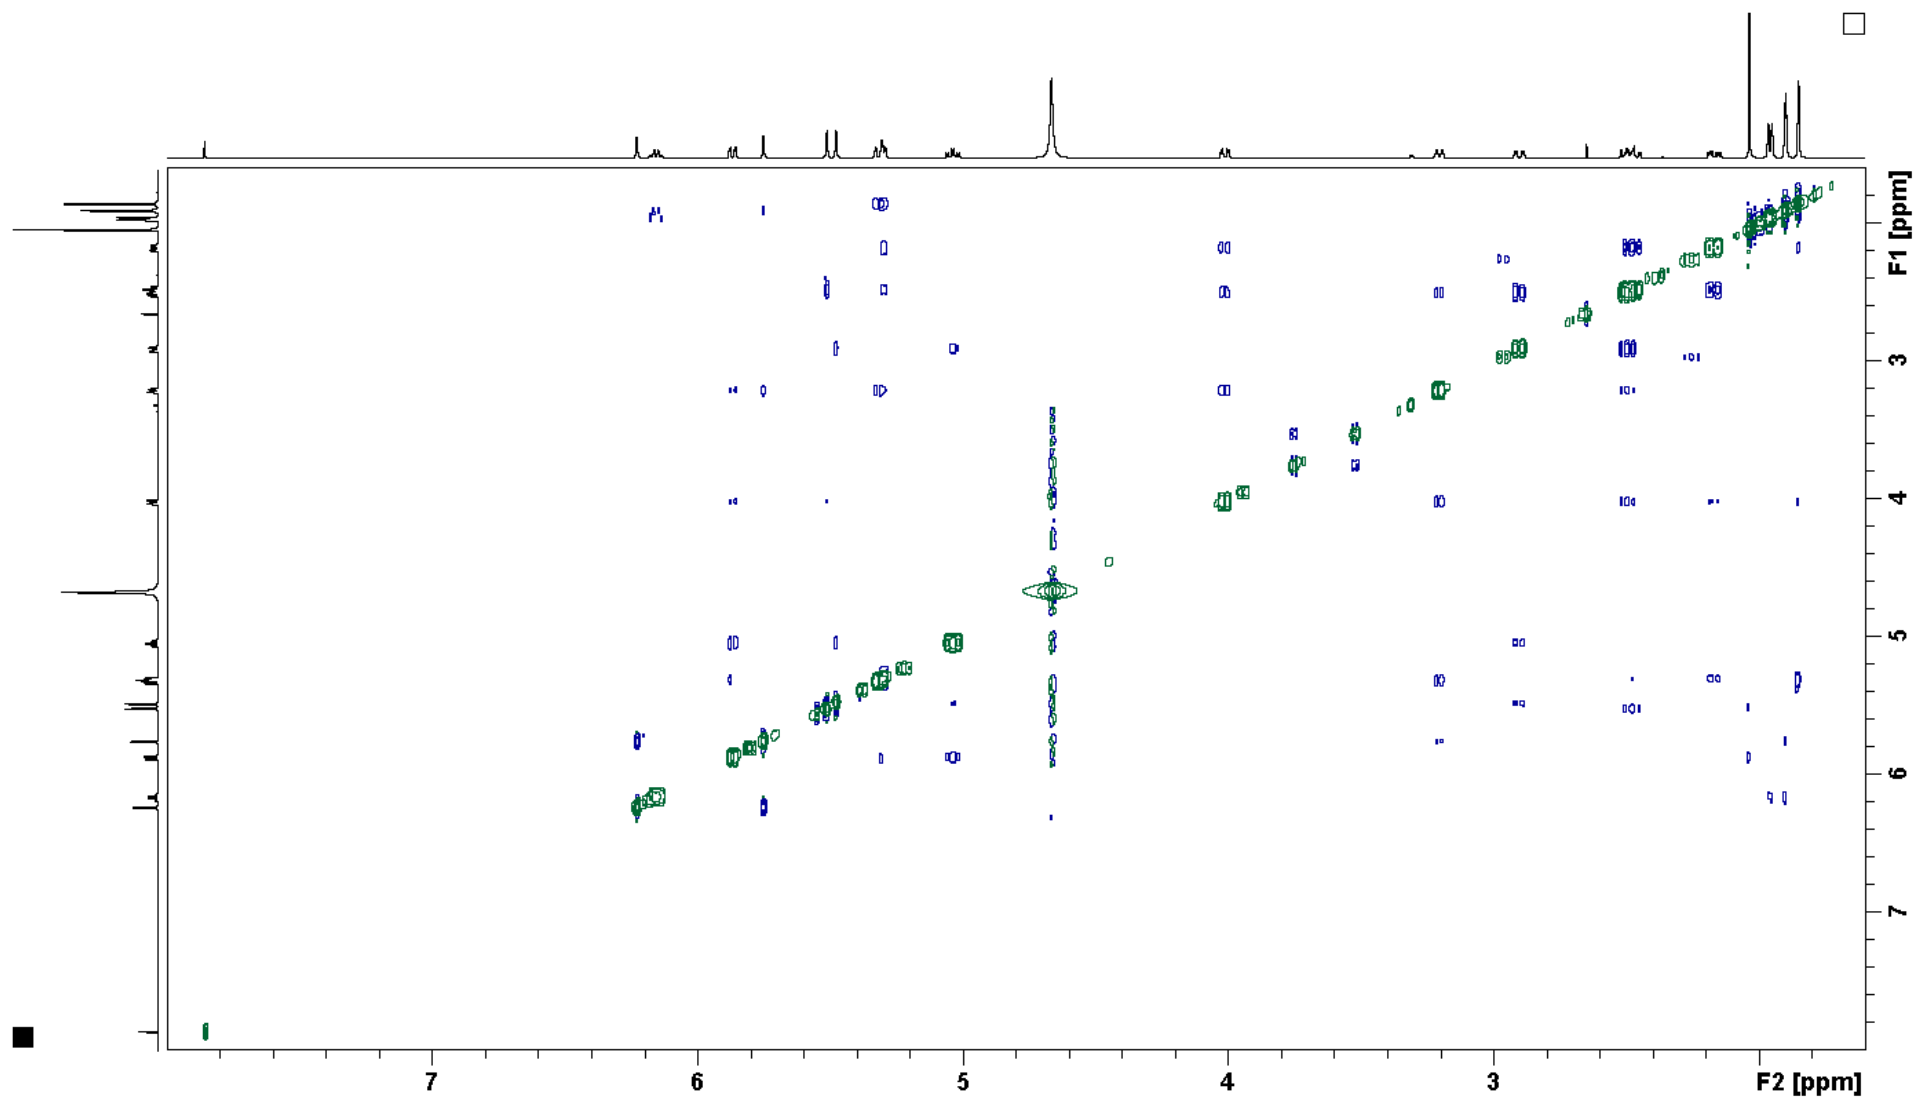

Figure S54: 2D  $^1\text{H}$ - $^1\text{H}$  NOESY spectrum of compound **14** in  $\text{CD}_3\text{OD}$ .

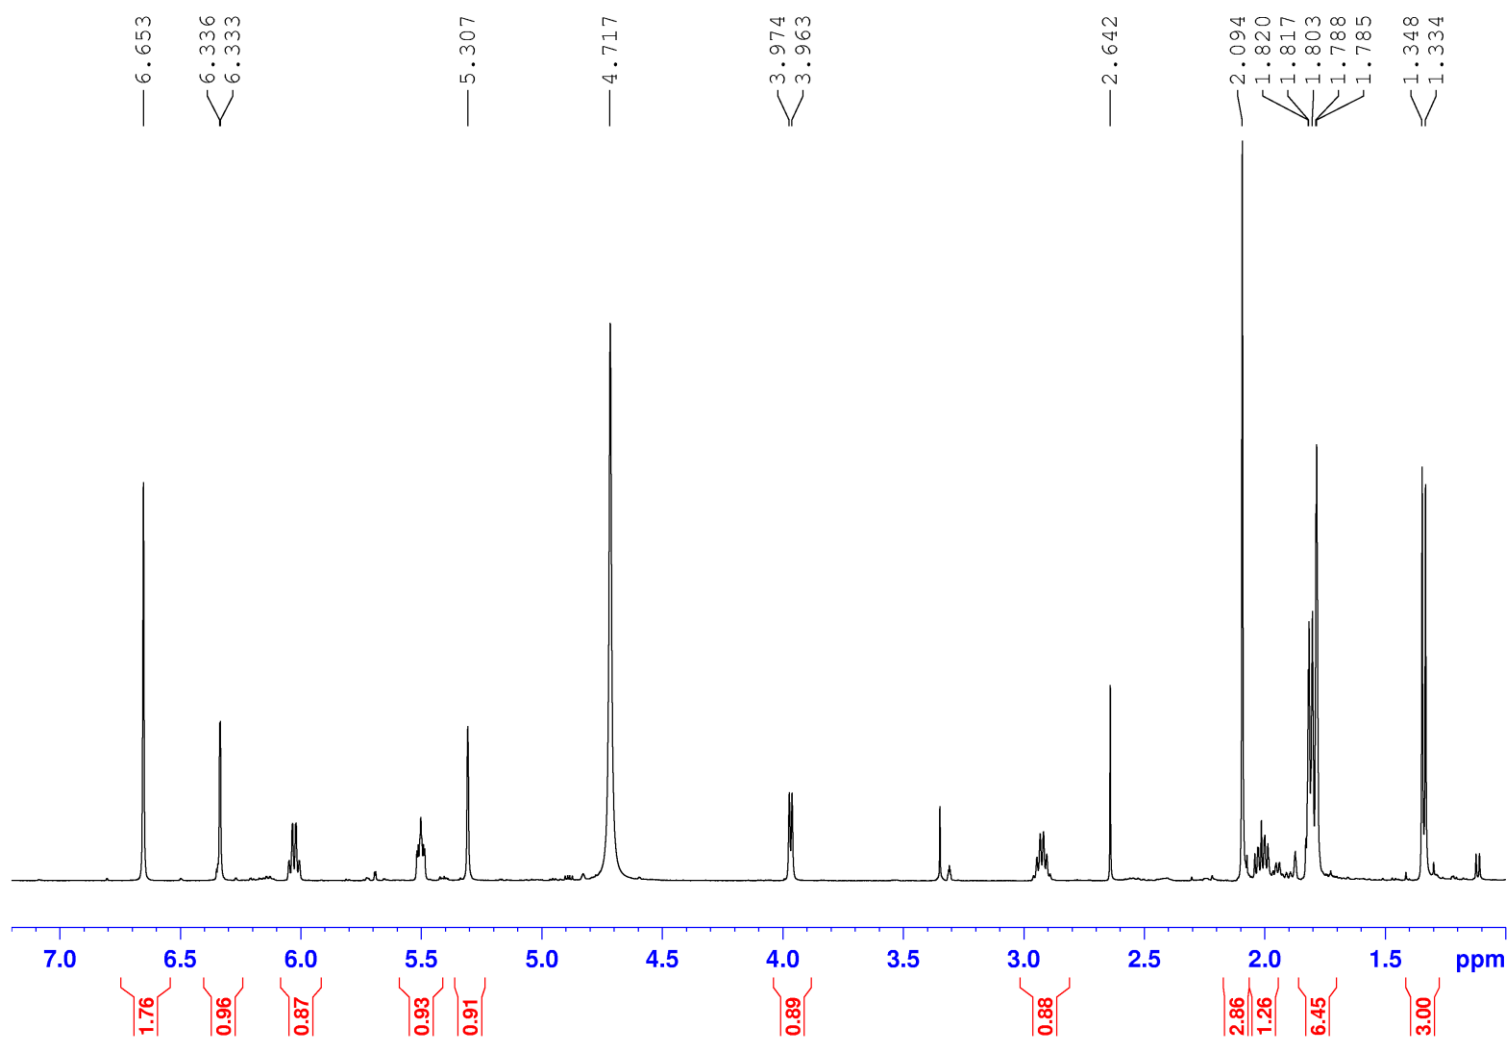

**Figure S55:** <sup>1</sup>H NMR spectrum of compound **15** in CD<sub>3</sub>OD.

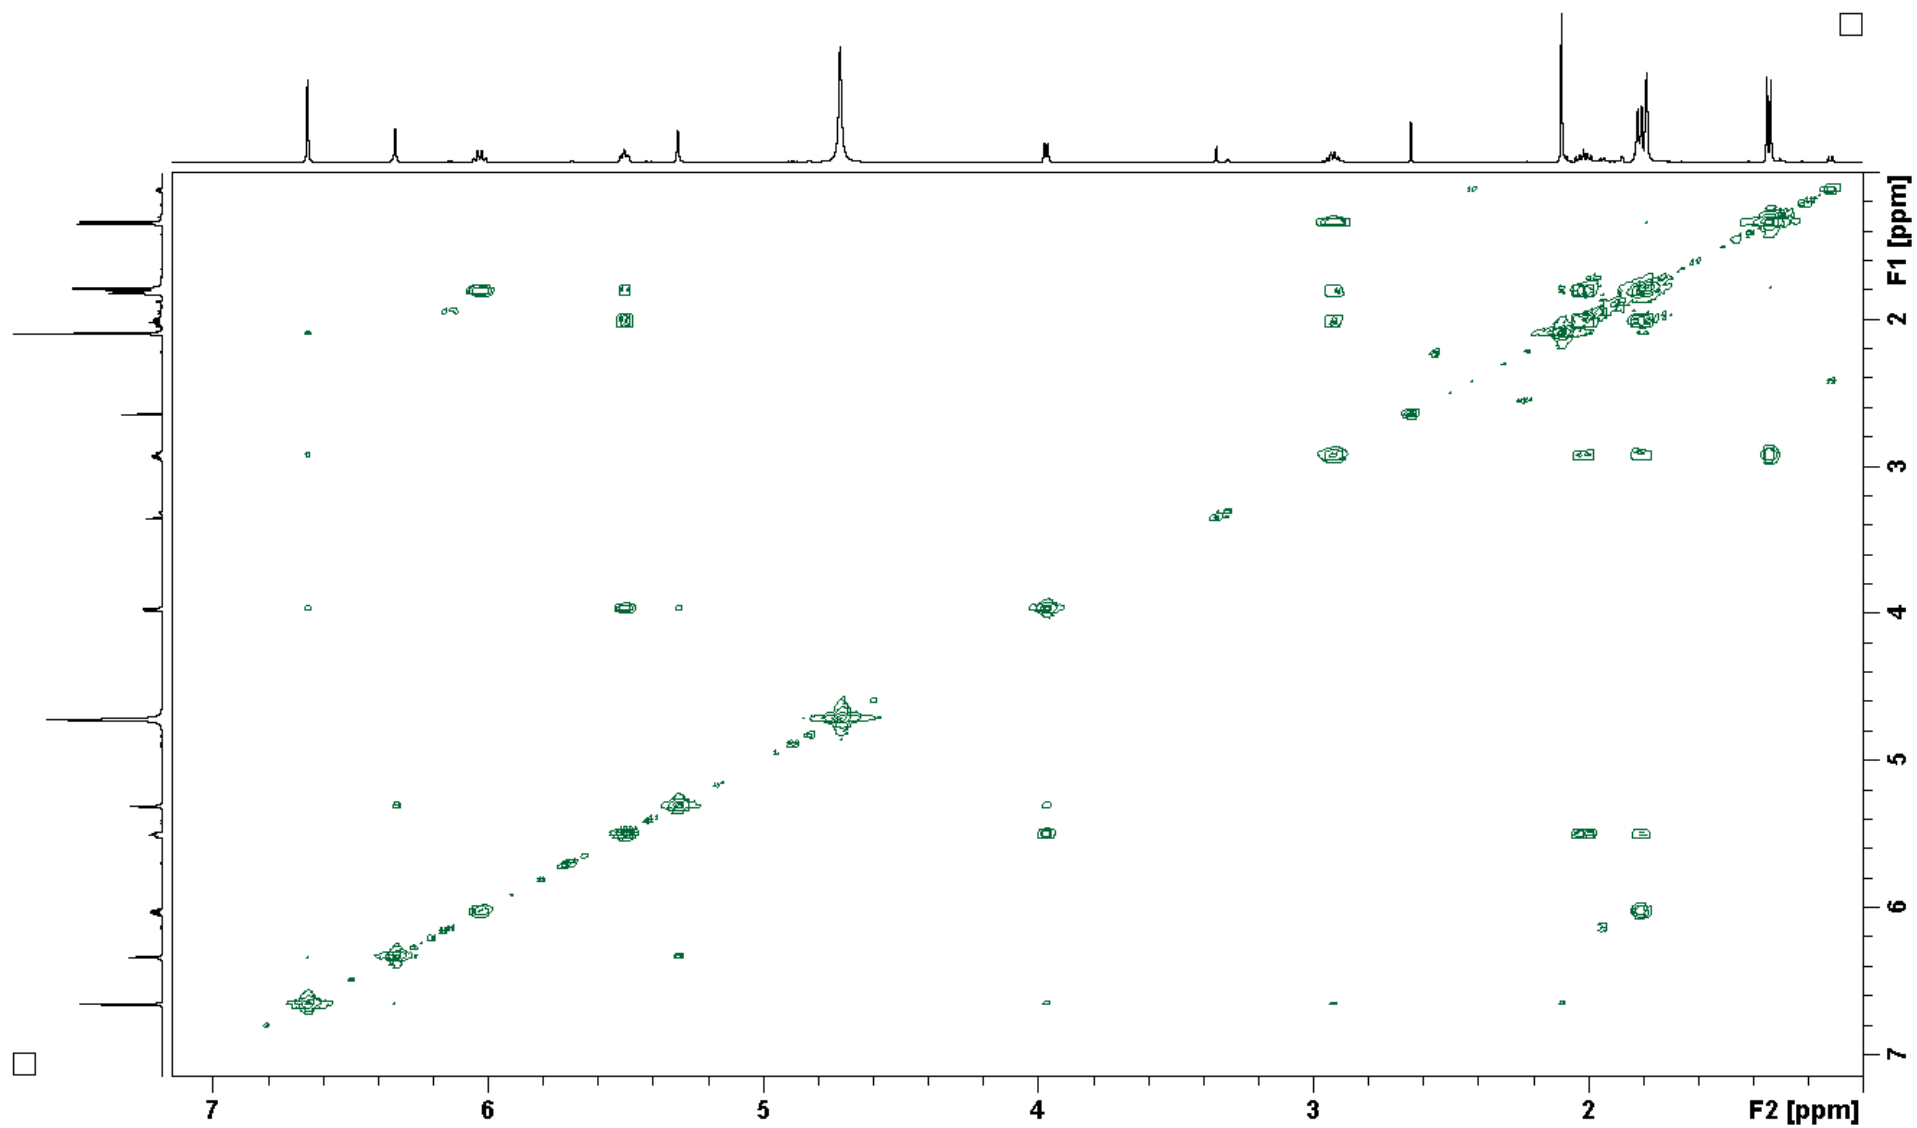

**Figure S56:**  $^1\text{H}$ - $^1\text{H}$ -COSY spectrum of compound 15 in  $\text{CD}_3\text{OD}$ .

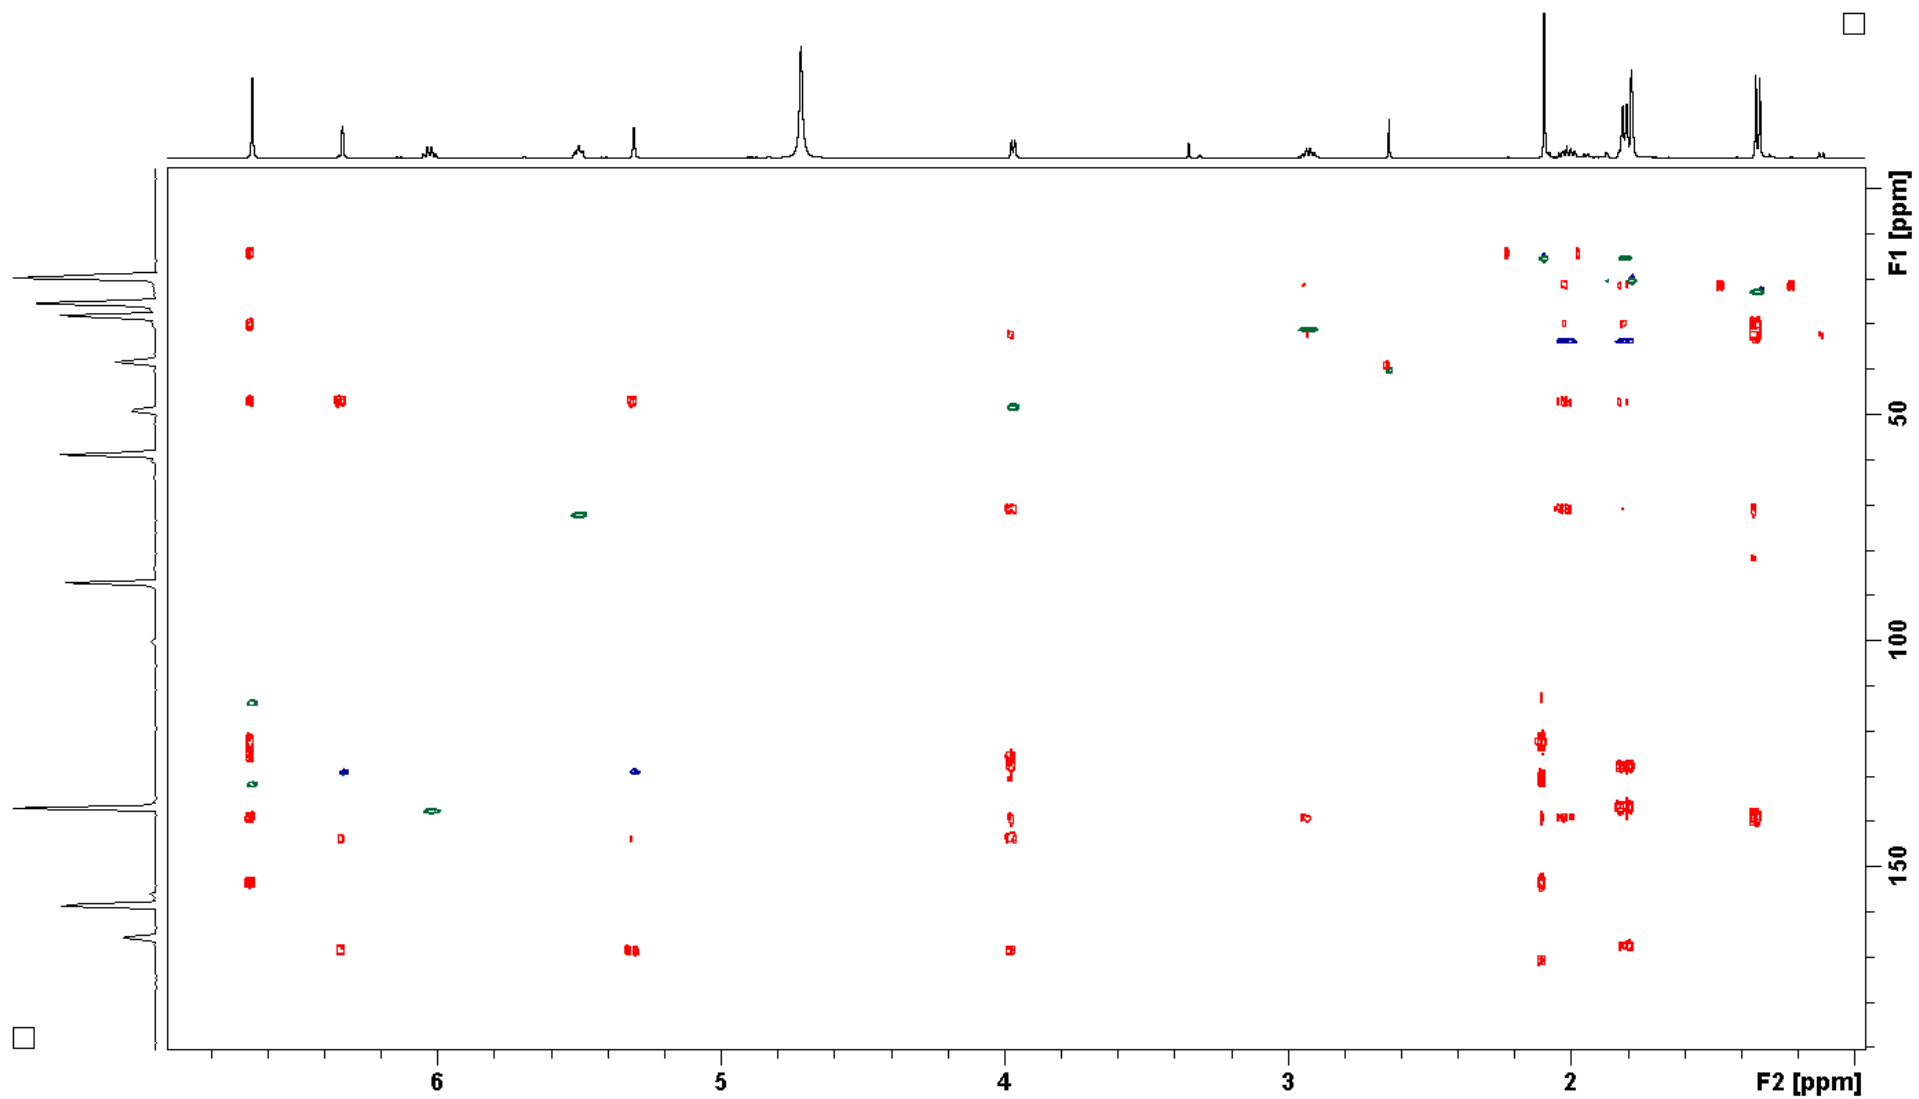

**Figure S57:** HSQC (green) and HMBC (red) overlaid spectra of compound **15** in CD<sub>3</sub>OD.

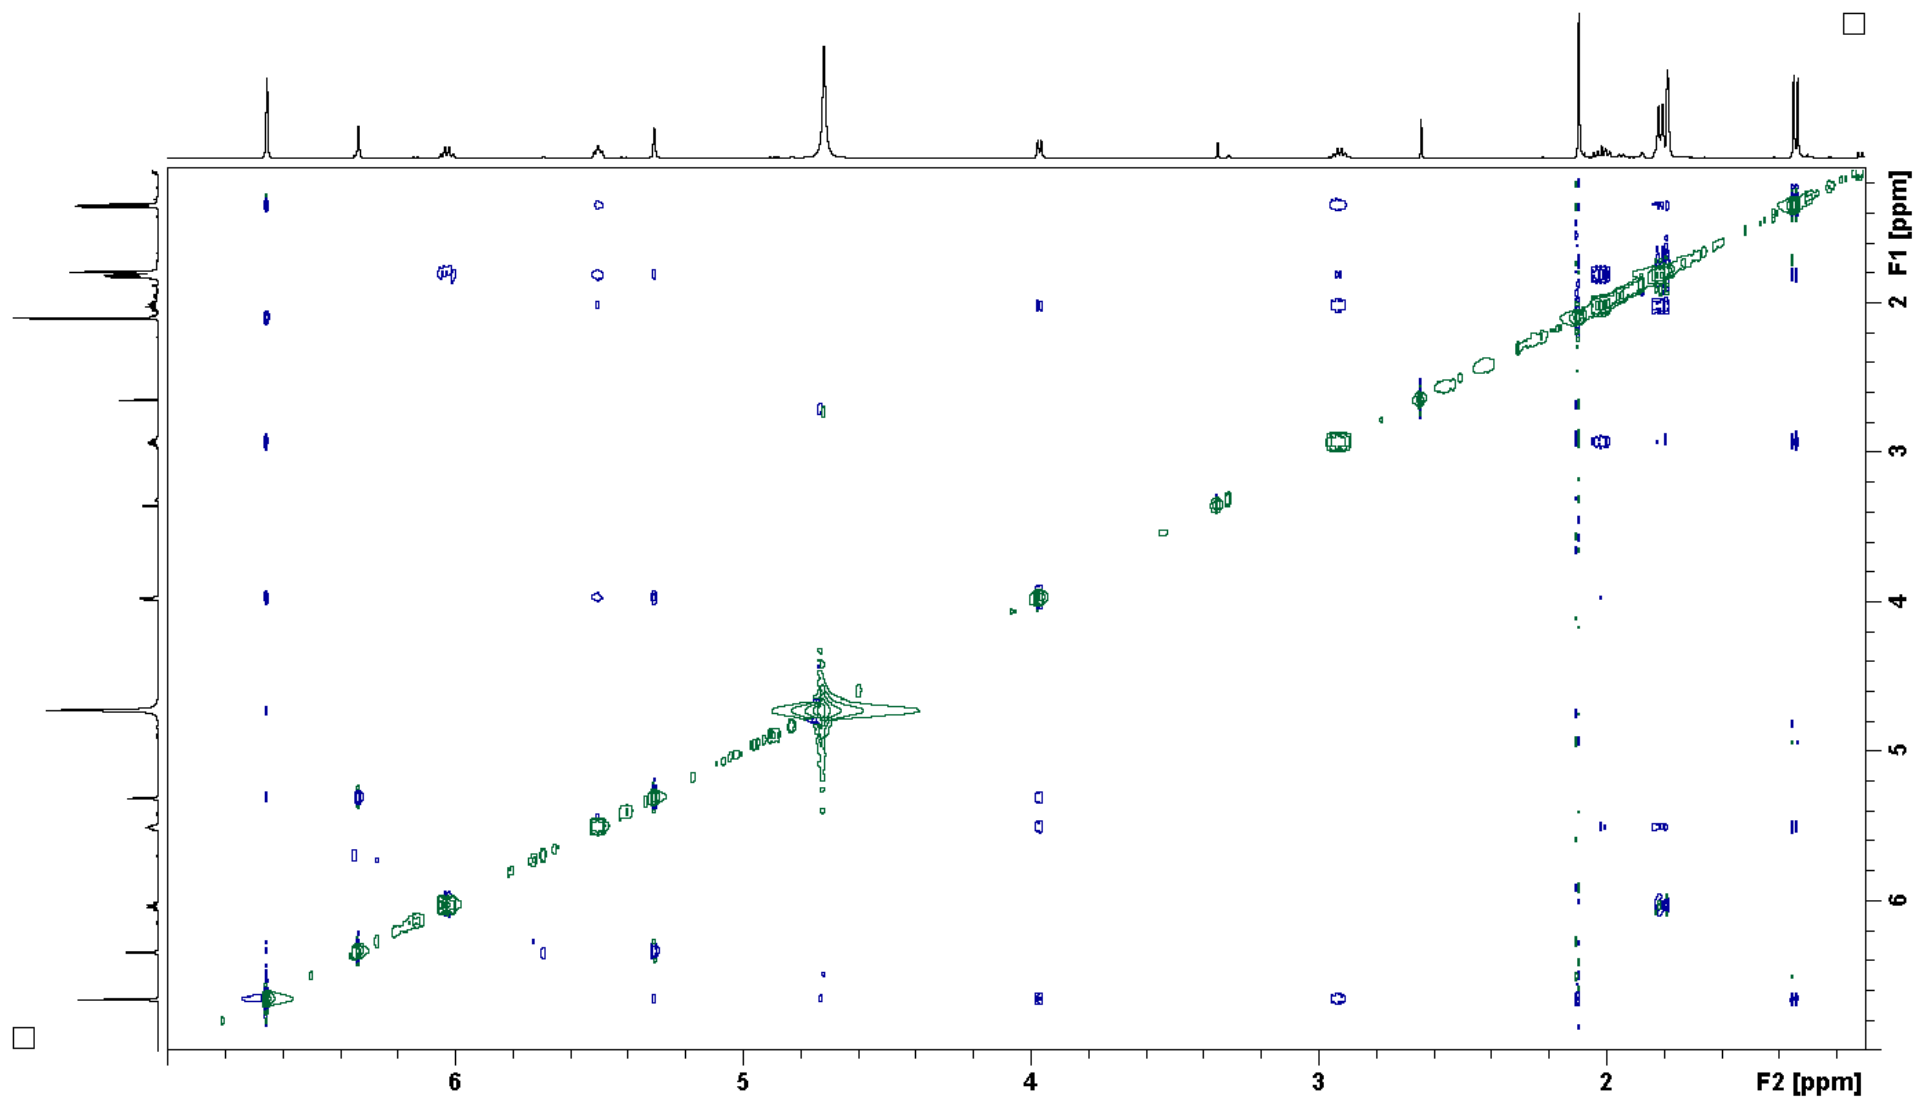

Figure S58: 2D  $^1\text{H}$ - $^1\text{H}$  NOESY spectrum of compound **15** in  $\text{CD}_3\text{OD}$ .

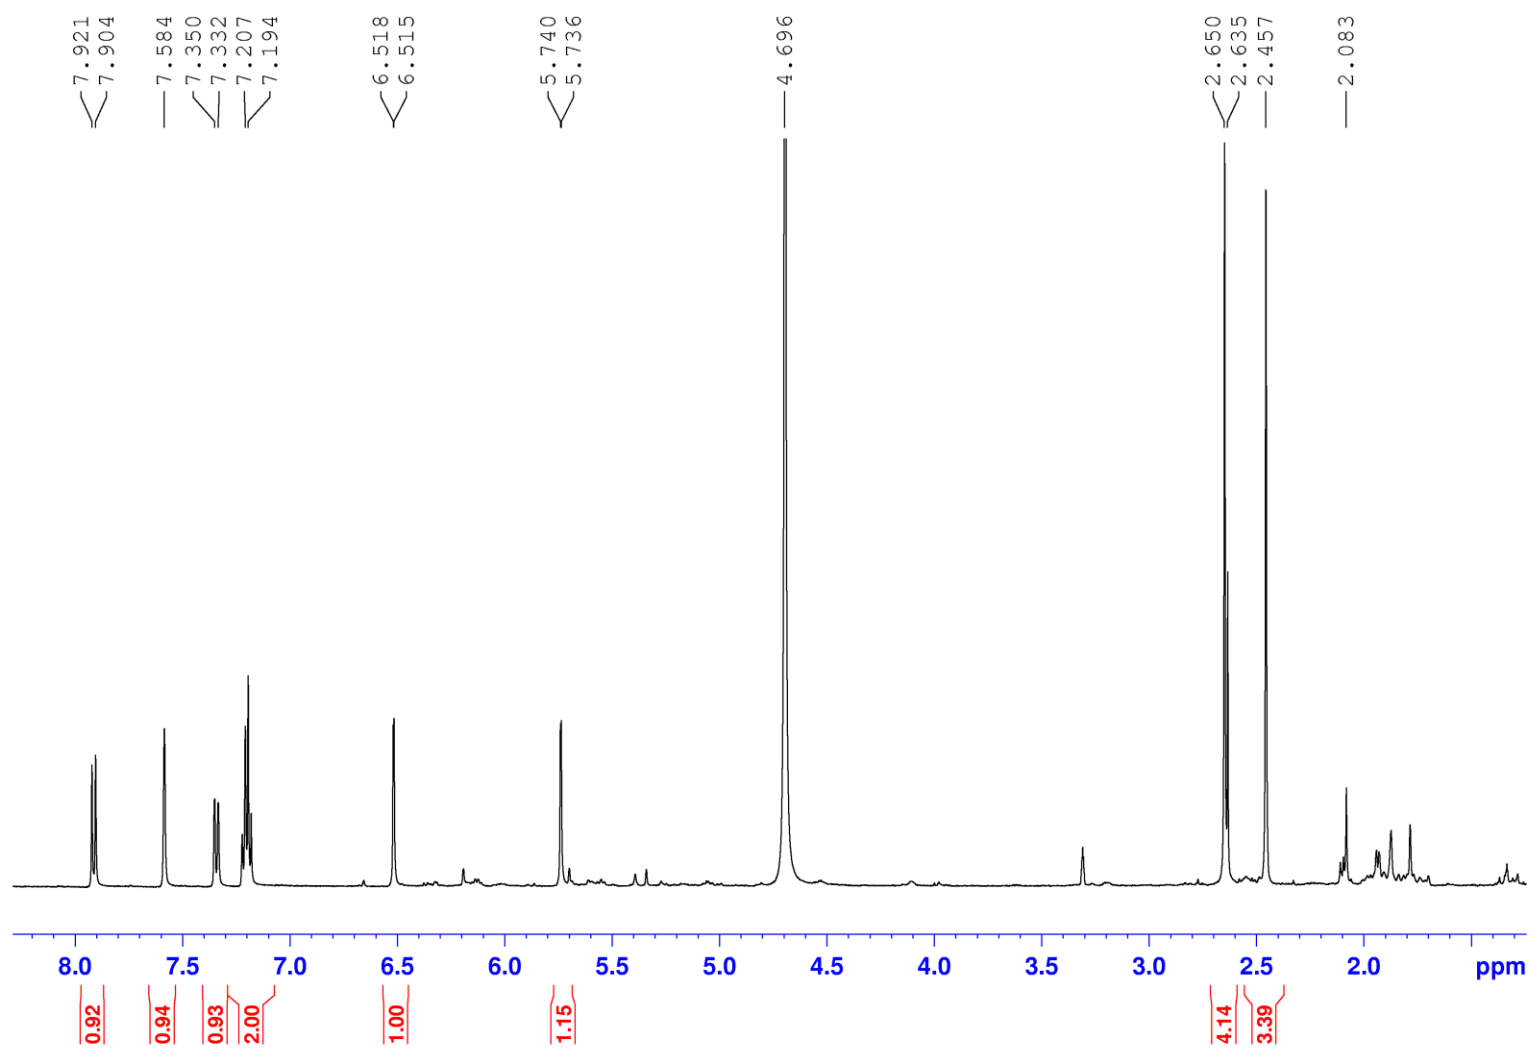

**Figure S59:** <sup>1</sup>H NMR spectrum of compound 16 in CD<sub>3</sub>OD.

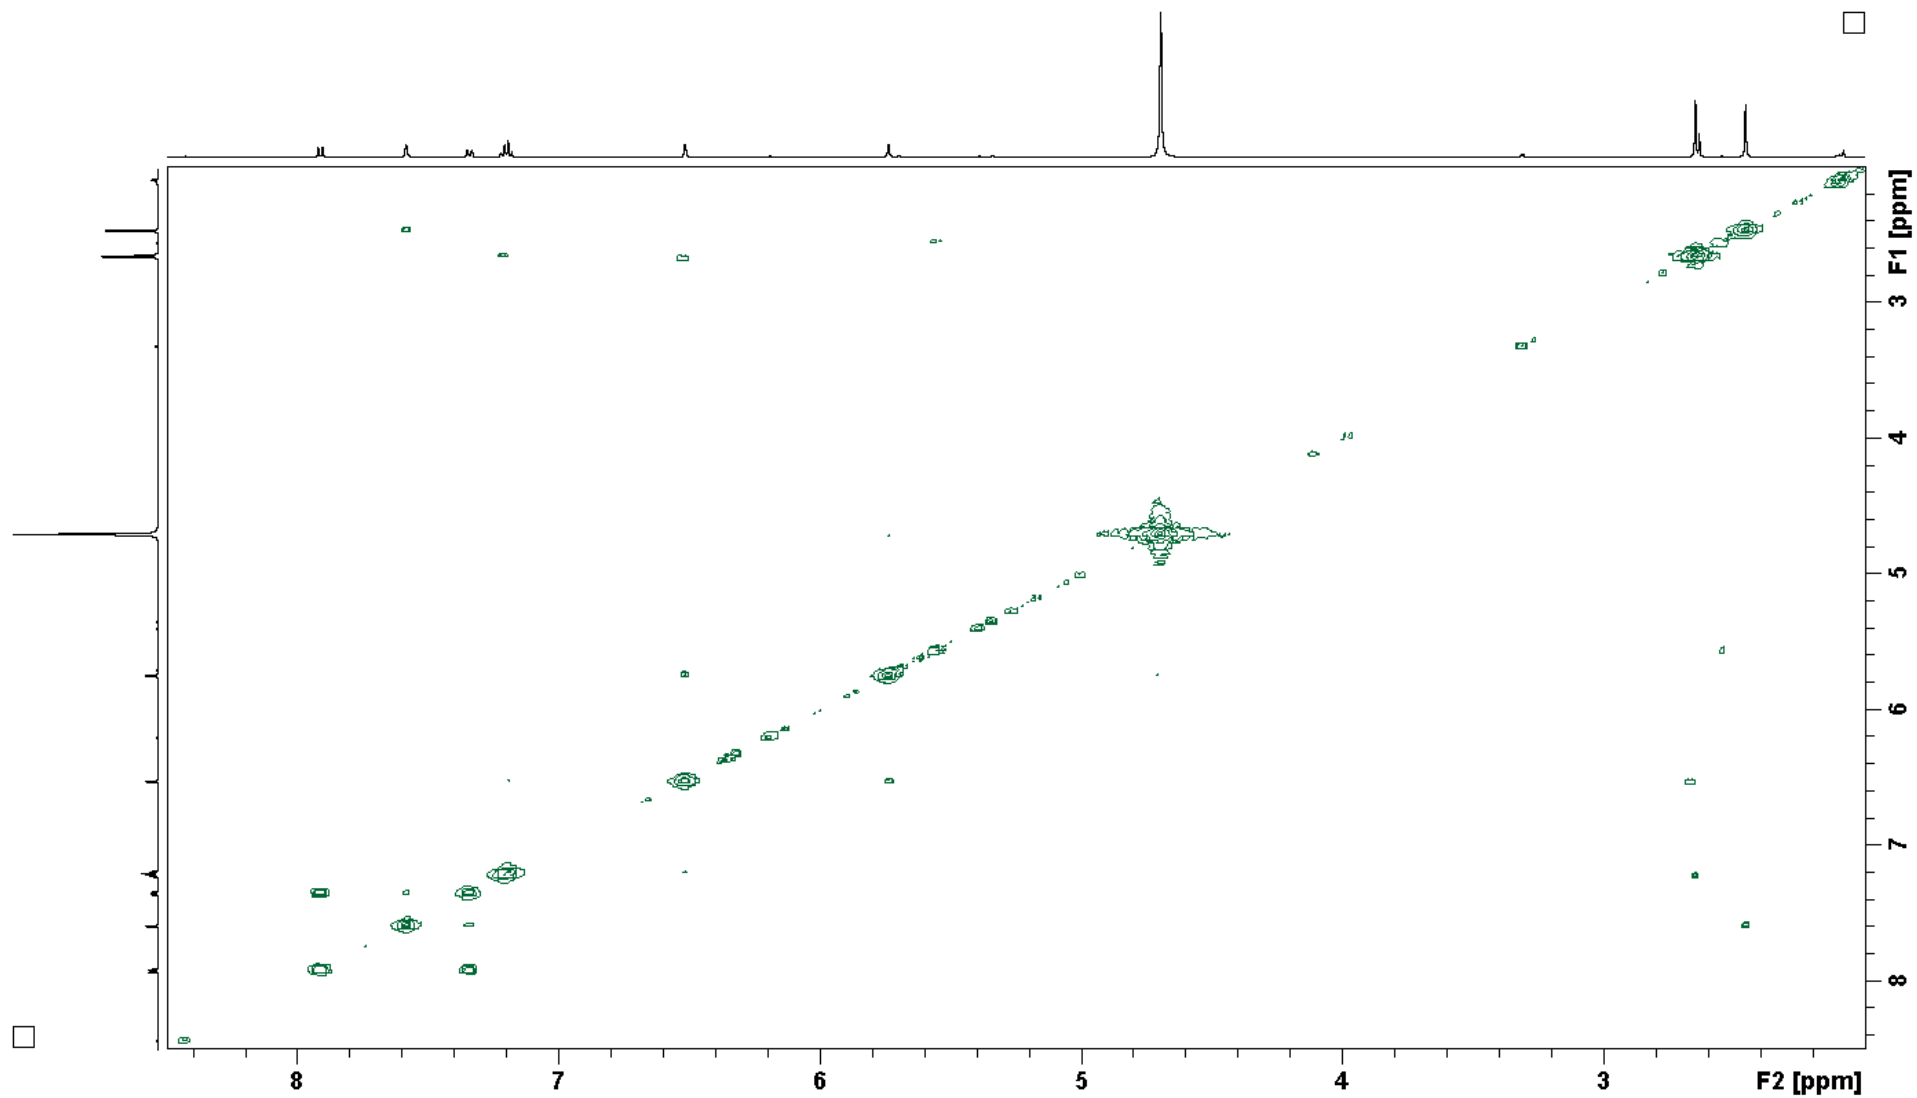

**Figure S60:**  $^1\text{H}$ - $^1\text{H}$ -COSY spectrum of compound 16 in  $\text{CD}_3\text{OD}$ .

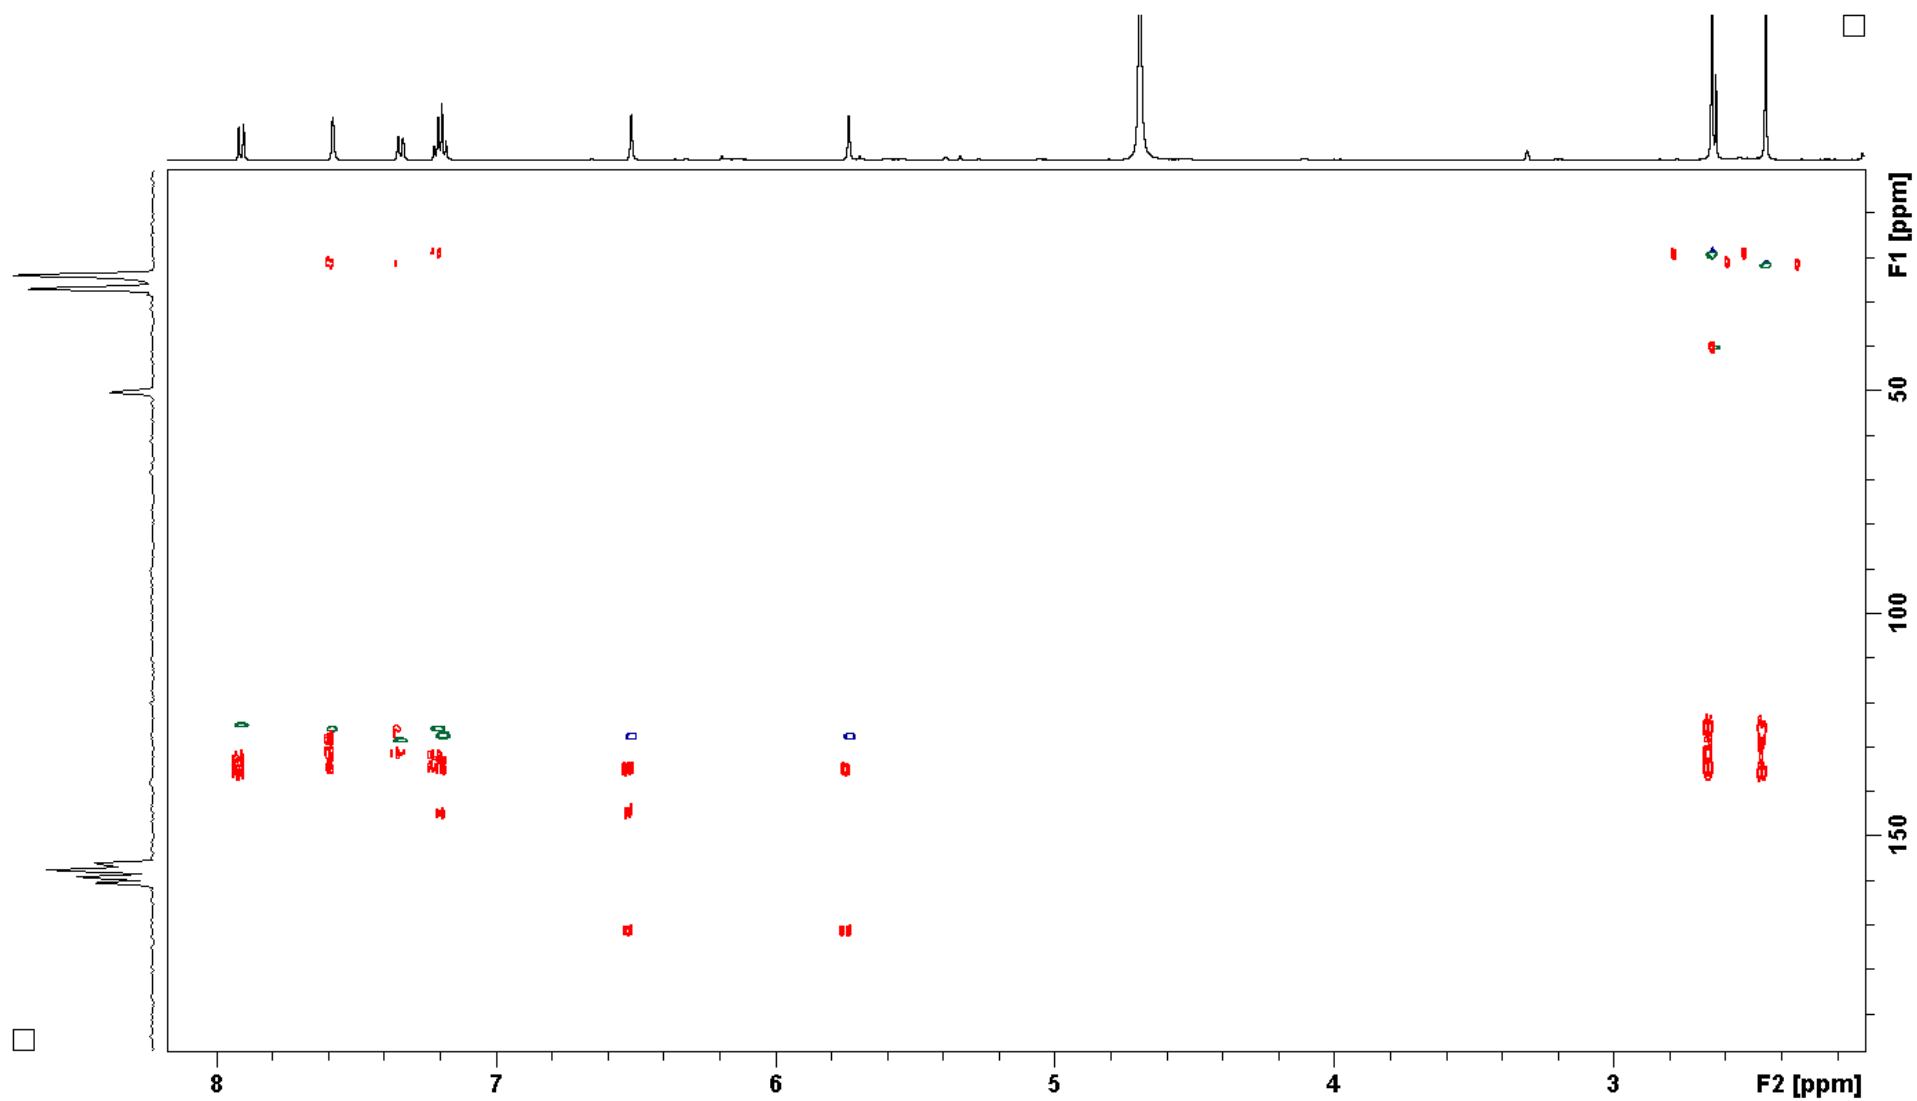

**Figure S61:** HSQC (green) and HMBC (red) overlaid spectra of compound **16** in CD<sub>3</sub>OD.

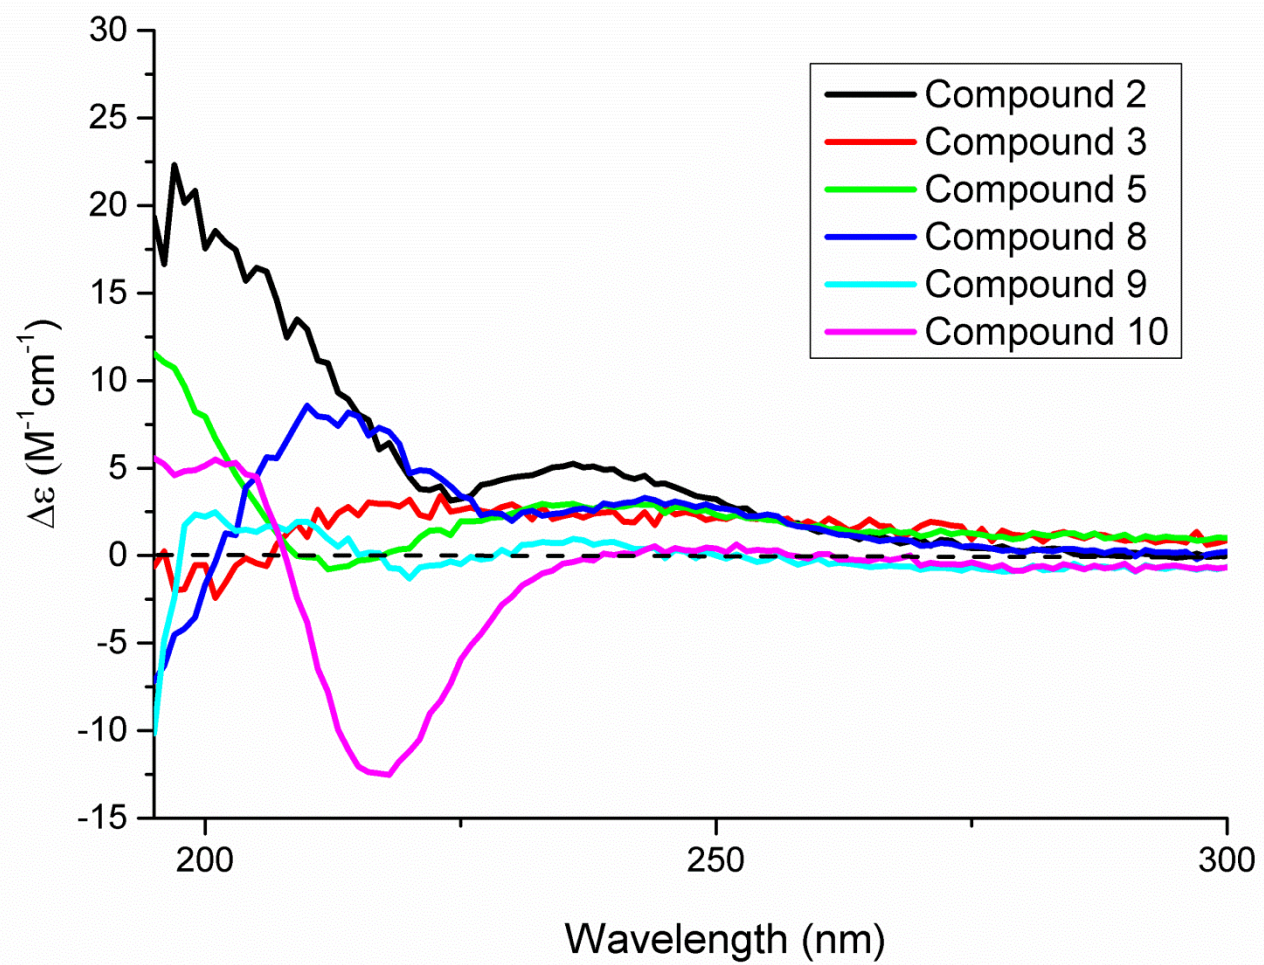

**Figure S62:** ECD spectra in MeOH of compounds 2, 3, 5, 8-10.

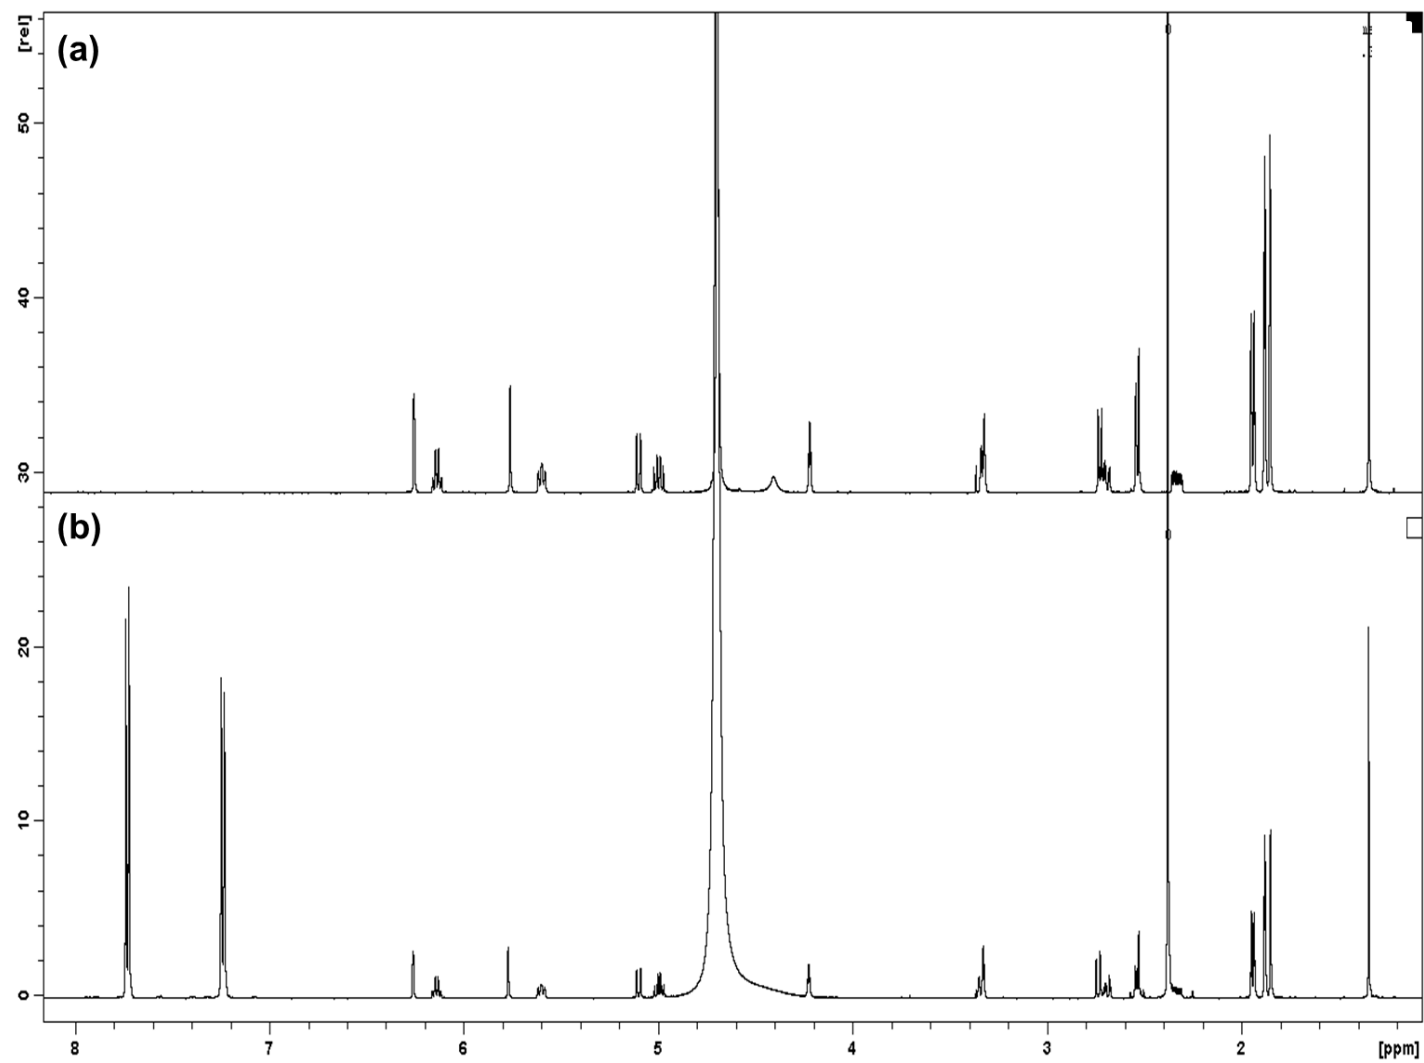

**Figure S63:** Overlay of <sup>1</sup>H NMR spectra of **3** (a) and of the reaction of **3** with *p*TSA after 24 hours (b).
